# Supplementary material for: Interfacial catalysis in and initial reaction mechanism of Al2O3 films fabricated by atomic layer deposition using non-hydrolytic sol–gel chemistry
Source: Royal Society of Chemistry journal article supplement (doi:10.1039/c6cp05842f), 2016-01-01
Supplement: c6cp05842f1.pdf [file c6cp05842f1.pdf]

## Electronic Supplementary Information

### **Interfacial catalysis in and initial reaction mechanism of Al<sub>2</sub>O<sub>3</sub> films fabricated by atomic layer deposition using non-hydrolytic sol-gel chemistry**

*Lina Xu,<sup>a</sup> Guoyong Fang,<sup>\*ab</sup> Yanqiang Cao<sup>b</sup> and Aidong Li<sup>b</sup>*

\*Email: [fanggy@wzu.edu.cn](mailto:fanggy@wzu.edu.cn)

<sup>a</sup>Key Laboratory of Carbon Materials of Zhejiang Province, College of Chemistry and  
Materials Engineering, Wenzhou University, Wenzhou 325035, China

<sup>b</sup>National Laboratory of Solid State Microstructures, College of Engineering and  
Applied Sciences, Nanjing University, Nanjing 210093, China

**Table S1** The atomic coordinates of all stationary points.....S2-S112

**Table S2** Interfacial interaction energies based NBO analysis.....S111-S127

**Table S1** The atomic coordinates of all stationary points.

| <b>OH-terminated Si(001) substrate, Si<sub>63</sub>H<sub>48</sub>-(OH)<sub>16</sub></b> |                  |             |             |             |
|-----------------------------------------------------------------------------------------|------------------|-------------|-------------|-------------|
| <b>Atom</b>                                                                             | <b>Fix/Relax</b> | <b>X</b>    | <b>Y</b>    | <b>Z</b>    |
| Si                                                                                      | -1               | -3.84010000 | 5.76010000  | -1.97260000 |
| Si                                                                                      | -1               | -3.84010000 | 1.92000000  | -1.97260000 |
| Si                                                                                      | -1               | -3.84010000 | -1.92000000 | -1.97260000 |
| Si                                                                                      | -1               | -3.84010000 | -5.76010000 | -1.97260000 |
| Si                                                                                      | -1               | 0.00000000  | 5.76010000  | -1.97260000 |
| Si                                                                                      | -1               | 0.00000000  | 1.92000000  | -1.97260000 |
| Si                                                                                      | -1               | 0.00000000  | -1.92000000 | -1.97260000 |
| Si                                                                                      | -1               | 0.00000000  | -5.76010000 | -1.97260000 |
| Si                                                                                      | -1               | 3.84010000  | 5.76010000  | -1.97260000 |
| Si                                                                                      | -1               | 3.84010000  | 1.92000000  | -1.97260000 |
| Si                                                                                      | -1               | 3.84010000  | -1.92000000 | -1.97260000 |
| Si                                                                                      | -1               | 3.84010000  | -5.76010000 | -1.97260000 |
| Si                                                                                      | -1               | -3.84010000 | 7.68020000  | -0.61490000 |
| Si                                                                                      | -1               | -3.84010000 | 3.84010000  | -0.61490000 |
| Si                                                                                      | -1               | -3.84010000 | 0.00000000  | -0.61490000 |
| Si                                                                                      | -1               | -3.84010000 | -3.84009900 | -0.61490100 |
| Si                                                                                      | -1               | -3.84010000 | -7.68020000 | -0.61490000 |
| Si                                                                                      | -1               | 0.00000000  | 7.68020000  | -0.61490000 |
| Si                                                                                      | -1               | 0.00000000  | 3.84010000  | -0.61490000 |
| Si                                                                                      | -1               | 0.00000000  | 0.00000000  | -0.61489900 |
| Si                                                                                      | -1               | 0.00000000  | -3.84010000 | -0.61490000 |
| Si                                                                                      | -1               | 0.00000000  | -7.68020000 | -0.61490000 |
| Si                                                                                      | -1               | 3.84010000  | 7.68020000  | -0.61490000 |
| Si                                                                                      | -1               | 3.84010000  | 3.84010000  | -0.61490000 |
| Si                                                                                      | -1               | 3.84010000  | 0.00000000  | -0.61490000 |
| Si                                                                                      | -1               | 3.84010000  | -3.84009900 | -0.61490000 |
| Si                                                                                      | -1               | 3.84010000  | -7.68020000 | -0.61490000 |
| Si                                                                                      | -1               | -5.76010000 | 7.68020000  | 0.74280000  |
| Si                                                                                      | -1               | -5.76010000 | 3.84010000  | 0.74280100  |
| Si                                                                                      | -1               | -5.76009800 | 0.00000200  | 0.74280100  |
| Si                                                                                      | -1               | -5.76009900 | -3.84010200 | 0.74280000  |
| Si                                                                                      | -1               | -5.76010000 | -7.68020000 | 0.74280000  |
| Si                                                                                      | -1               | -1.92000100 | 7.68020000  | 0.74279900  |
| Si                                                                                      | -1               | -1.91999900 | 3.84010000  | 0.74280100  |
| Si                                                                                      | -1               | -1.92000200 | 0.00000000  | 0.74279800  |

---

|    |    |             |             |             |
|----|----|-------------|-------------|-------------|
| Si | -1 | -1.92000000 | -3.84010000 | 0.74280000  |
| Si | -1 | -1.92000200 | -7.68020000 | 0.74279900  |
| Si | -1 | 1.92000000  | 7.68020000  | 0.74280100  |
| Si | -1 | 1.92000200  | 3.84010100  | 0.74280000  |
| Si | -1 | 1.92000100  | 0.00000000  | 0.74280000  |
| Si | -1 | 1.92000000  | -3.84010000 | 0.74280000  |
| Si | -1 | 1.92000100  | -7.68020000 | 0.74280000  |
| Si | -1 | 5.76009700  | 7.68020000  | 0.74279900  |
| Si | -1 | 5.76009800  | 3.84010000  | 0.74279600  |
| Si | -1 | 5.76009900  | 0.00000000  | 0.74280000  |
| Si | -1 | 5.76009900  | -3.84010200 | 0.74279900  |
| Si | -1 | 5.76010000  | -7.68019900 | 0.74279900  |
| H  | -1 | -2.97390000 | 5.79380000  | -3.16220000 |
| H  | -1 | -5.23870000 | 5.77270000  | -2.51530000 |
| H  | -1 | -2.98160000 | 1.92030000  | -3.17130000 |
| H  | -1 | -5.23930000 | 1.92050000  | -2.51900000 |
| H  | -1 | -2.98150000 | -1.92030000 | -3.17120000 |
| H  | -1 | -5.23930000 | -1.92050000 | -2.51900000 |
| H  | -1 | -2.97400000 | -5.79360000 | -3.16220000 |
| H  | -1 | -5.23870000 | -5.77270000 | -2.51530000 |
| H  | -1 | 1.16760000  | 5.71010000  | -2.86270000 |
| H  | -1 | -1.16750000 | 5.71010000  | -2.86280000 |
| H  | -1 | 1.17310000  | 1.91760000  | -2.85730000 |
| H  | -1 | -1.17330000 | 1.91760000  | -2.85710000 |
| H  | -1 | 1.17330000  | -1.91760000 | -2.85710000 |
| H  | -1 | -1.17310000 | -1.91760000 | -2.85730000 |
| H  | -1 | 1.16750000  | -5.71010000 | -2.86280000 |
| H  | -1 | -1.16760000 | -5.71010000 | -2.86270000 |
| H  | -1 | 5.23870000  | 5.77270000  | -2.51530000 |
| H  | -1 | 2.97400000  | 5.79360000  | -3.16220000 |
| H  | -1 | 5.23930000  | 1.92050000  | -2.51900000 |
| H  | -1 | 2.98150000  | 1.92030000  | -3.17120000 |
| H  | -1 | 5.23930000  | -1.92050000 | -2.51900000 |
| H  | -1 | 2.98160000  | -1.92030000 | -3.17130000 |
| H  | -1 | 5.23870000  | -5.77270000 | -2.51530000 |
| H  | -1 | 2.97390000  | -5.79380000 | -3.16220000 |
| H  | -1 | -3.82400000 | 8.85870000  | -1.53420000 |
| H  | -1 | -3.82400000 | -8.85870000 | -1.53420000 |

---

---

|    |    |             |             |             |
|----|----|-------------|-------------|-------------|
| H  | -1 | 0.00000000  | 8.92610000  | -1.42910000 |
| H  | -1 | 0.00000000  | -8.92610000 | -1.42910000 |
| H  | -1 | 3.82400000  | 8.85870000  | -1.53420000 |
| H  | -1 | 3.82400000  | -8.85870000 | -1.53420000 |
| H  | -1 | -7.00580000 | 7.40190000  | -0.01410000 |
| H  | -1 | -5.87800000 | 8.93300000  | 1.52980000  |
| H  | -1 | -7.05960000 | 3.84790000  | 0.03190000  |
| H  | -1 | -7.05810000 | 0.00000000  | 0.02890000  |
| H  | -1 | -7.05950000 | -3.84760000 | 0.03180100  |
| H  | -1 | -5.87620000 | -8.93250000 | 1.53080000  |
| H  | -1 | -7.00650000 | -7.40340000 | -0.01330000 |
| H  | -1 | -1.90150000 | 8.88670000  | 1.61890000  |
| H  | -1 | -1.90149900 | -8.88670000 | 1.61880000  |
| H  | -1 | 1.90150000  | 8.88670000  | 1.61880000  |
| H  | -1 | 1.90150000  | -8.88670000 | 1.61890000  |
| H  | -1 | 5.87620100  | 8.93250000  | 1.53080000  |
| H  | -1 | 7.00650000  | 7.40340000  | -0.01329900 |
| H  | -1 | 7.05950100  | 3.84760000  | 0.03180300  |
| H  | -1 | 7.05810000  | 0.00000000  | 0.02890000  |
| H  | -1 | 7.05960100  | -3.84790000 | 0.03190100  |
| H  | -1 | 7.00580000  | -7.40190000 | -0.01410000 |
| H  | -1 | 5.87800000  | -8.93300000 | 1.52980000  |
| Si | 0  | -5.02296600 | 5.74433400  | 1.96473200  |
| Si | 0  | -5.04957500 | 1.94624500  | 1.93566100  |
| Si | 0  | -5.03619200 | -1.93915600 | 1.93267000  |
| Si | 0  | -5.03373000 | -5.74021400 | 1.96493900  |
| Si | 0  | -2.59392100 | 5.75698300  | 1.95405500  |
| Si | 0  | -2.62851300 | 1.91891700  | 1.93061500  |
| Si | 0  | -2.61072200 | -1.91833800 | 1.93985400  |
| Si | 0  | -2.60975200 | -5.75471000 | 1.94408900  |
| Si | 0  | 2.60967600  | 5.75473500  | 1.94412500  |
| Si | 0  | 2.61066500  | 1.91830200  | 1.93989700  |
| Si | 0  | 2.62856600  | -1.91900300 | 1.93061300  |
| Si | 0  | 2.59391600  | -5.75710300 | 1.95396700  |
| Si | 0  | 5.03362300  | 5.74010300  | 1.96494400  |
| Si | 0  | 5.03610700  | 1.93926500  | 1.93262300  |
| Si | 0  | 5.04967500  | -1.94621500 | 1.93569600  |
| Si | 0  | 5.02290200  | -5.74433000 | 1.96476600  |

---

---

|   |   |             |             |            |
|---|---|-------------|-------------|------------|
| O | 0 | -5.33998300 | 5.57877100  | 3.61248300 |
| O | 0 | -5.40519400 | 2.17274800  | 3.56529100 |
| O | 0 | -5.35029100 | -2.05615400 | 3.58593100 |
| O | 0 | -5.36983300 | -5.48741600 | 3.59726100 |
| O | 0 | -2.18262200 | 5.74773700  | 3.58010000 |
| O | 0 | -2.41863000 | 1.90676500  | 3.60213000 |
| O | 0 | -2.23394500 | -1.92135600 | 3.57493700 |
| O | 0 | -2.36654800 | -5.75140300 | 3.61077600 |
| O | 0 | 2.36648700  | 5.75105200  | 3.61076100 |
| O | 0 | 2.23433700  | 1.92195400  | 3.57507300 |
| O | 0 | 2.41886500  | -1.90661100 | 3.60217000 |
| O | 0 | 2.18236900  | -5.74845000 | 3.57997100 |
| O | 0 | 5.36955000  | 5.48639300  | 3.59726700 |
| O | 0 | 5.34991000  | 2.05745000  | 3.58584100 |
| O | 0 | 5.40549200  | -2.17245100 | 3.56529000 |
| O | 0 | 5.33945800  | -5.57824900 | 3.61253600 |
| H | 0 | -5.64559300 | 4.69449400  | 3.86150400 |
| H | 0 | -4.67748900 | 1.88627500  | 4.13816800 |
| H | 0 | -5.68112900 | -2.92370200 | 3.85988000 |
| H | 0 | -4.60892000 | -5.70322800 | 4.15808100 |
| H | 0 | -2.96721000 | 5.67868100  | 4.14422700 |
| H | 0 | -1.51898100 | 1.86624200  | 3.94705000 |
| H | 0 | -3.03483800 | -1.94974700 | 4.12016900 |
| H | 0 | -1.46271500 | -5.66270500 | 3.93573900 |
| H | 0 | 1.46279100  | 5.66218300  | 3.93600400 |
| H | 0 | 3.03550700  | 1.95045900  | 4.11993400 |
| H | 0 | 1.51929600  | -1.86543800 | 3.94724900 |
| H | 0 | 2.96678300  | -5.67709700 | 4.14405300 |
| H | 0 | 4.60851400  | 5.70204200  | 4.15800900 |
| H | 0 | 5.67986800  | 2.92553400  | 3.85927500 |
| H | 0 | 4.67777600  | -1.88587300 | 4.13811600 |
| H | 0 | 5.64705300  | -4.69460700 | 3.86129400 |

**Cl-Al-terminated surface**

| <b>Atom</b> | <b>Fix/Relax</b> | <b>X</b>    | <b>Y</b>    | <b>Z</b>    |
|-------------|------------------|-------------|-------------|-------------|
| Si          | -1               | -3.84010000 | 5.76010000  | -1.97260000 |
| Si          | -1               | -3.84010000 | 1.92000000  | -1.97260000 |
| Si          | -1               | -3.84010000 | -1.92000000 | -1.97260000 |

---

---

|    |    |             |             |             |
|----|----|-------------|-------------|-------------|
| Si | -1 | -3.84010000 | -5.76010000 | -1.97260000 |
| Si | -1 | 0.00000000  | 5.76010000  | -1.97260000 |
| Si | -1 | 0.00000000  | 1.92000000  | -1.97260000 |
| Si | -1 | 0.00000000  | -1.92000000 | -1.97260000 |
| Si | -1 | 0.00000000  | -5.76010000 | -1.97260000 |
| Si | -1 | 3.84010000  | 5.76010000  | -1.97260000 |
| Si | -1 | 3.84010000  | 1.92000000  | -1.97260000 |
| Si | -1 | 3.84010000  | -1.92000000 | -1.97260000 |
| Si | -1 | 3.84010000  | -5.76010000 | -1.97260000 |
| Si | -1 | -3.84010000 | 7.68020000  | -0.61490100 |
| Si | -1 | -3.84009900 | 3.84010000  | -0.61490100 |
| Si | -1 | -3.84010000 | 0.00000000  | -0.61490000 |
| Si | -1 | -3.84010000 | -3.84010000 | -0.61490000 |
| Si | -1 | -3.84010000 | -7.68020000 | -0.61490000 |
| Si | -1 | 0.00000000  | 7.68020100  | -0.61489800 |
| Si | -1 | 0.00000000  | 3.84009800  | -0.61489500 |
| Si | -1 | 0.00000000  | -0.00000100 | -0.61490000 |
| Si | -1 | 0.00000000  | -3.84010000 | -0.61490000 |
| Si | -1 | 0.00000000  | -7.68020000 | -0.61490000 |
| Si | -1 | 3.84010000  | 7.68020000  | -0.61490000 |
| Si | -1 | 3.84009900  | 3.84010000  | -0.61490100 |
| Si | -1 | 3.84010000  | 0.00000000  | -0.61490000 |
| Si | -1 | 3.84010000  | -3.84010000 | -0.61490000 |
| Si | -1 | 3.84010000  | -7.68020000 | -0.61490000 |
| Si | -1 | -5.76010000 | 7.68020000  | 0.74280100  |
| Si | -1 | -5.76010100 | 3.84009900  | 0.74280200  |
| Si | -1 | -5.76009800 | 0.00000100  | 0.74280000  |
| Si | -1 | -5.76010000 | -3.84009900 | 0.74280000  |
| Si | -1 | -5.76010000 | -7.68020000 | 0.74280000  |
| Si | -1 | -1.92000300 | 7.68019800  | 0.74279900  |
| Si | -1 | -1.92000500 | 3.84010200  | 0.74279700  |
| Si | -1 | -1.91999800 | -0.00000100 | 0.74280000  |
| Si | -1 | -1.92000100 | -3.84010100 | 0.74280000  |
| Si | -1 | -1.91999900 | -7.68020000 | 0.74280000  |
| Si | -1 | 1.92000300  | 7.68019800  | 0.74279900  |
| Si | -1 | 1.92000600  | 3.84010200  | 0.74279700  |
| Si | -1 | 1.91999800  | -0.00000100 | 0.74280000  |
| Si | -1 | 1.92000000  | -3.84010000 | 0.74280000  |

---

---

|    |    |             |             |             |
|----|----|-------------|-------------|-------------|
| Si | -1 | 1.92000000  | -7.68020000 | 0.74280000  |
| Si | -1 | 5.76010000  | 7.68020000  | 0.74280000  |
| Si | -1 | 5.76010000  | 3.84009900  | 0.74280200  |
| Si | -1 | 5.76009800  | 0.00000100  | 0.74280000  |
| Si | -1 | 5.76010000  | -3.84010000 | 0.74280000  |
| Si | -1 | 5.76010000  | -7.68020000 | 0.74280000  |
| H  | -1 | -2.97390000 | 5.79380000  | -3.16220000 |
| H  | -1 | -5.23870000 | 5.77270000  | -2.51530000 |
| H  | -1 | -2.98160000 | 1.92030000  | -3.17130000 |
| H  | -1 | -5.23930000 | 1.92050000  | -2.51900000 |
| H  | -1 | -2.98150000 | -1.92030000 | -3.17120000 |
| H  | -1 | -5.23930000 | -1.92050000 | -2.51900000 |
| H  | -1 | -2.97400000 | -5.79360000 | -3.16220000 |
| H  | -1 | -5.23870000 | -5.77270000 | -2.51530000 |
| H  | -1 | 1.16760000  | 5.71010000  | -2.86270000 |
| H  | -1 | -1.16750000 | 5.71010000  | -2.86280000 |
| H  | -1 | 1.17310000  | 1.91760000  | -2.85730000 |
| H  | -1 | -1.17330000 | 1.91760000  | -2.85710000 |
| H  | -1 | 1.17330000  | -1.91760000 | -2.85710000 |
| H  | -1 | -1.17310000 | -1.91760000 | -2.85730000 |
| H  | -1 | 1.16750000  | -5.71010000 | -2.86280000 |
| H  | -1 | -1.16760000 | -5.71010000 | -2.86270000 |
| H  | -1 | 5.23870000  | 5.77270000  | -2.51530000 |
| H  | -1 | 2.97400000  | 5.79360000  | -3.16220000 |
| H  | -1 | 5.23930000  | 1.92050000  | -2.51900000 |
| H  | -1 | 2.98150000  | 1.92030000  | -3.17120000 |
| H  | -1 | 5.23930000  | -1.92050000 | -2.51900000 |
| H  | -1 | 2.98160000  | -1.92030000 | -3.17130000 |
| H  | -1 | 5.23870000  | -5.77270000 | -2.51530000 |
| H  | -1 | 2.97390000  | -5.79380000 | -3.16220000 |
| H  | -1 | -3.82400000 | 8.85870000  | -1.53420000 |
| H  | -1 | -3.82400000 | -8.85870000 | -1.53420000 |
| H  | -1 | 0.00000000  | 8.92610000  | -1.42910000 |
| H  | -1 | 0.00000000  | -8.92610000 | -1.42910000 |
| H  | -1 | 3.82400000  | 8.85870000  | -1.53420000 |
| H  | -1 | 3.82400000  | -8.85870000 | -1.53420000 |
| H  | -1 | -7.00580000 | 7.40190000  | -0.01410000 |
| H  | -1 | -5.87799900 | 8.93300000  | 1.52980000  |

---

---

|    |    |             |             |             |
|----|----|-------------|-------------|-------------|
| H  | -1 | -7.05960000 | 3.84790100  | 0.03189900  |
| H  | -1 | -7.05810000 | 0.00000000  | 0.02890000  |
| H  | -1 | -7.05950000 | -3.84760000 | 0.03180000  |
| H  | -1 | -5.87620000 | -8.93250000 | 1.53080000  |
| H  | -1 | -7.00650000 | -7.40340000 | -0.01330000 |
| H  | -1 | -1.90149800 | 8.88670000  | 1.61890000  |
| H  | -1 | -1.90150000 | -8.88670000 | 1.61880000  |
| H  | -1 | 1.90149800  | 8.88670000  | 1.61880000  |
| H  | -1 | 1.90150000  | -8.88670000 | 1.61890000  |
| H  | -1 | 5.87619900  | 8.93250000  | 1.53080000  |
| H  | -1 | 7.00650000  | 7.40340000  | -0.01330000 |
| H  | -1 | 7.05950000  | 3.84760100  | 0.03180000  |
| H  | -1 | 7.05810000  | 0.00000000  | 0.02890000  |
| H  | -1 | 7.05960000  | -3.84790000 | 0.03190000  |
| H  | -1 | 7.00580000  | -7.40190000 | -0.01410000 |
| H  | -1 | 5.87800000  | -8.93300000 | 1.52980000  |
| Si | 0  | -4.95954500 | 5.75339800  | 2.02298800  |
| Si | 0  | -5.05774300 | 1.92354700  | 1.91026700  |
| Si | 0  | -4.95543900 | -1.92960800 | 1.99373500  |
| Si | 0  | -5.04346800 | -5.75677500 | 1.94073600  |
| Si | 0  | -2.43582900 | 5.75523300  | 1.99686400  |
| Si | 0  | -2.62460000 | 1.92300500  | 1.92587800  |
| Si | 0  | -2.43377100 | -1.92082700 | 1.98131700  |
| Si | 0  | -2.60885900 | -5.74320400 | 1.93933800  |
| Si | 0  | 2.43598600  | 5.75522700  | 1.99682400  |
| Si | 0  | 2.62457800  | 1.92300800  | 1.92582500  |
| Si | 0  | 2.43370300  | -1.92082700 | 1.98126700  |
| Si | 0  | 2.60876100  | -5.74321900 | 1.93936900  |
| Si | 0  | 4.95968700  | 5.75333900  | 2.02286200  |
| Si | 0  | 5.05772900  | 1.92356400  | 1.91028300  |
| Si | 0  | 4.95546100  | -1.92957500 | 1.99375300  |
| Si | 0  | 5.04335900  | -5.75682600 | 1.94087500  |
| O  | 0  | -5.32130300 | 5.60356100  | 3.65367500  |
| O  | 0  | -5.28416400 | 1.94638000  | 3.57826500  |
| O  | 0  | -5.27833300 | -1.99303800 | 3.64151600  |
| O  | 0  | -5.25522800 | -5.64656800 | 3.60881600  |
| O  | 0  | -1.53355600 | 5.72164100  | 3.40273300  |
| O  | 0  | -2.42075400 | 1.94773900  | 3.59897900  |

---



---

|    |   |             |             |            |
|----|---|-------------|-------------|------------|
| O  | 0 | -1.54305000 | -1.92894200 | 3.39512900 |
| O  | 0 | -2.39408000 | -5.63056600 | 3.60730400 |
| O  | 0 | 1.53389300  | 5.72166500  | 3.40281200 |
| O  | 0 | 2.42064100  | 1.94789600  | 3.59895200 |
| O  | 0 | 1.54240000  | -1.92891500 | 3.39473100 |
| O  | 0 | 2.39388300  | -5.63083200 | 3.60733600 |
| O  | 0 | 5.32137600  | 5.60354900  | 3.65355700 |
| O  | 0 | 5.28407400  | 1.94654500  | 3.57826900 |
| O  | 0 | 5.27846500  | -1.99289500 | 3.64152000 |
| O  | 0 | 5.25506100  | -5.64678200 | 3.60898400 |
| H  | 0 | -6.22520100 | 5.36927300  | 3.88994800 |
| H  | 0 | -6.19232900 | -2.11113400 | 3.92303500 |
| Al | 0 | -3.86070900 | 1.99665200  | 4.54133400 |
| Al | 0 | -3.82639100 | -5.45287800 | 4.54263300 |
| Cl | 0 | -3.89563800 | 2.07605500  | 6.60588900 |
| Cl | 0 | -3.83999700 | -5.15959200 | 6.58904400 |
| Al | 0 | -0.00022000 | -1.97175000 | 4.13556000 |
| Al | 0 | 0.00015400  | 5.53762000  | 4.13302200 |
| Cl | 0 | 0.00012200  | -2.06998000 | 6.21132100 |
| Cl | 0 | 0.00008700  | 5.13448500  | 6.17240800 |
| Al | 0 | 3.82616000  | -5.45351700 | 4.54278300 |
| Al | 0 | 3.86057800  | 1.99700800  | 4.54130000 |
| Cl | 0 | 3.83939300  | -5.16134900 | 6.58936000 |
| Cl | 0 | 3.89623900  | 2.07709500  | 6.60581900 |
| H  | 0 | 6.22521100  | 5.36908200  | 3.88985800 |
| H  | 0 | 6.19247100  | -2.11107300 | 3.92301700 |

**Im1<sup>A</sup>-Si**

| <b>Atom</b> | <b>Fix/Relax</b> | <b>X</b>    | <b>Y</b>    | <b>Z</b>    |
|-------------|------------------|-------------|-------------|-------------|
| Si          | -1               | -3.84010000 | 5.76010000  | -1.97260000 |
| Si          | -1               | -3.84010000 | 1.92000000  | -1.97260000 |
| Si          | -1               | -3.84010000 | -1.92000000 | -1.97260000 |
| Si          | -1               | -3.84010000 | -5.76010000 | -1.97260000 |
| Si          | -1               | 0.00000000  | 5.76010000  | -1.97260000 |
| Si          | -1               | 0.00000000  | 1.92000000  | -1.97260000 |
| Si          | -1               | 0.00000000  | -1.92000000 | -1.97260000 |
| Si          | -1               | 0.00000000  | -5.76010000 | -1.97260000 |
| Si          | -1               | 3.84010000  | 5.76010000  | -1.97260000 |

---

---

|    |    |             |             |             |
|----|----|-------------|-------------|-------------|
| Si | -1 | 3.84010000  | 1.92000000  | -1.97260000 |
| Si | -1 | 3.84010000  | -1.92000000 | -1.97260000 |
| Si | -1 | 3.84010000  | -5.76010000 | -1.97260000 |
| Si | -1 | -3.84010000 | 7.68020000  | -0.61490000 |
| Si | -1 | -3.84010100 | 3.84010100  | -0.61490000 |
| Si | -1 | -3.84010000 | -0.00000100 | -0.61490000 |
| Si | -1 | -3.84009900 | -3.84010000 | -0.61490000 |
| Si | -1 | -3.84010000 | -7.68020000 | -0.61490000 |
| Si | -1 | 0.00000000  | 7.68020000  | -0.61490000 |
| Si | -1 | 0.00000000  | 3.84010000  | -0.61490000 |
| Si | -1 | 0.00000000  | 0.00000000  | -0.61490000 |
| Si | -1 | 0.00000000  | -3.84010000 | -0.61489900 |
| Si | -1 | 0.00000000  | -7.68020000 | -0.61490000 |
| Si | -1 | 3.84010000  | 7.68020000  | -0.61490000 |
| Si | -1 | 3.84010000  | 3.84010000  | -0.61490000 |
| Si | -1 | 3.84010000  | 0.00000000  | -0.61490000 |
| Si | -1 | 3.84010000  | -3.84010000 | -0.61490000 |
| Si | -1 | 3.84010000  | -7.68020000 | -0.61490000 |
| Si | -1 | -5.76010000 | 7.68019900  | 0.74280100  |
| Si | -1 | -5.76009900 | 3.84009900  | 0.74280000  |
| Si | -1 | -5.76010100 | -0.00000100 | 0.74279900  |
| Si | -1 | -5.76010000 | -3.84010000 | 0.74280000  |
| Si | -1 | -5.76010000 | -7.68020000 | 0.74280000  |
| Si | -1 | -1.92000100 | 7.68020000  | 0.74280100  |
| Si | -1 | -1.91999900 | 3.84010100  | 0.74279900  |
| Si | -1 | -1.92000000 | 0.00000100  | 0.74279900  |
| Si | -1 | -1.92000200 | -3.84009900 | 0.74280100  |
| Si | -1 | -1.92000000 | -7.68020000 | 0.74280000  |
| Si | -1 | 1.92000000  | 7.68020000  | 0.74280000  |
| Si | -1 | 1.92000000  | 3.84010000  | 0.74280000  |
| Si | -1 | 1.92000000  | 0.00000000  | 0.74280000  |
| Si | -1 | 1.92000000  | -3.84010000 | 0.74280000  |
| Si | -1 | 1.92000000  | -7.68020000 | 0.74280000  |
| Si | -1 | 5.76010000  | 7.68020000  | 0.74280000  |
| Si | -1 | 5.76010000  | 3.84010000  | 0.74280000  |
| Si | -1 | 5.76010000  | 0.00000000  | 0.74280000  |
| Si | -1 | 5.76010000  | -3.84010000 | 0.74280000  |
| Si | -1 | 5.76010000  | -7.68020000 | 0.74280000  |

---

---

|   |    |             |             |             |
|---|----|-------------|-------------|-------------|
| H | -1 | -2.97390000 | 5.79380000  | -3.16220000 |
| H | -1 | -5.23870000 | 5.77270000  | -2.51530000 |
| H | -1 | -2.98160000 | 1.92030000  | -3.17130000 |
| H | -1 | -5.23930000 | 1.92050000  | -2.51900000 |
| H | -1 | -2.98150000 | -1.92030000 | -3.17120000 |
| H | -1 | -5.23930000 | -1.92050000 | -2.51900000 |
| H | -1 | -2.97400000 | -5.79360000 | -3.16220000 |
| H | -1 | -5.23870000 | -5.77270000 | -2.51530000 |
| H | -1 | 1.16760000  | 5.71010000  | -2.86270000 |
| H | -1 | -1.16750000 | 5.71010000  | -2.86280000 |
| H | -1 | 1.17310000  | 1.91760000  | -2.85730000 |
| H | -1 | -1.17330000 | 1.91760000  | -2.85710000 |
| H | -1 | 1.17330000  | -1.91760000 | -2.85710000 |
| H | -1 | -1.17310000 | -1.91760000 | -2.85730000 |
| H | -1 | 1.16750000  | -5.71010000 | -2.86280000 |
| H | -1 | -1.16760000 | -5.71010000 | -2.86270000 |
| H | -1 | 5.23870000  | 5.77270000  | -2.51530000 |
| H | -1 | 2.97400000  | 5.79360000  | -3.16220000 |
| H | -1 | 5.23930000  | 1.92050000  | -2.51900000 |
| H | -1 | 2.98150000  | 1.92030000  | -3.17120000 |
| H | -1 | 5.23930000  | -1.92050000 | -2.51900000 |
| H | -1 | 2.98160000  | -1.92030000 | -3.17130000 |
| H | -1 | 5.23870000  | -5.77270000 | -2.51530000 |
| H | -1 | 2.97390000  | -5.79380000 | -3.16220000 |
| H | -1 | -3.82400000 | 8.85870000  | -1.53420000 |
| H | -1 | -3.82400000 | -8.85870000 | -1.53420000 |
| H | -1 | 0.00000000  | 8.92610000  | -1.42910000 |
| H | -1 | 0.00000000  | -8.92610000 | -1.42910000 |
| H | -1 | 3.82400000  | 8.85870000  | -1.53420000 |
| H | -1 | 3.82400000  | -8.85870000 | -1.53420000 |
| H | -1 | -7.00580000 | 7.40190000  | -0.01410000 |
| H | -1 | -5.87800000 | 8.93300000  | 1.52980000  |
| H | -1 | -7.05960000 | 3.84790000  | 0.03190000  |
| H | -1 | -7.05810000 | 0.00000000  | 0.02890000  |
| H | -1 | -7.05950000 | -3.84760000 | 0.03180000  |
| H | -1 | -5.87620000 | -8.93250000 | 1.53080000  |
| H | -1 | -7.00650000 | -7.40340000 | -0.01330000 |
| H | -1 | -1.90150000 | 8.88670000  | 1.61890000  |

---

---

|    |    |             |             |             |
|----|----|-------------|-------------|-------------|
| H  | -1 | -1.90150000 | -8.88670000 | 1.61880000  |
| H  | -1 | 1.90150000  | 8.88670000  | 1.61880000  |
| H  | -1 | 1.90150000  | -8.88670000 | 1.61890000  |
| H  | -1 | 5.87620000  | 8.93250000  | 1.53080000  |
| H  | -1 | 7.00650000  | 7.40340000  | -0.01330000 |
| H  | -1 | 7.05950000  | 3.84760000  | 0.03180000  |
| H  | -1 | 7.05810000  | 0.00000000  | 0.02890000  |
| H  | -1 | 7.05960000  | -3.84790000 | 0.03190000  |
| H  | -1 | 7.00580000  | -7.40190000 | -0.01410000 |
| H  | -1 | 5.87800000  | -8.93300000 | 1.52980000  |
| Si | 0  | -5.02054400 | 5.74767200  | 1.97108700  |
| Si | 0  | -5.08591700 | 1.93164400  | 1.95964300  |
| Si | 0  | -5.05100600 | -1.92194000 | 1.95479500  |
| Si | 0  | -5.03494100 | -5.74639000 | 1.96470000  |
| Si | 0  | -2.58793300 | 5.75702000  | 1.95612200  |
| Si | 0  | -2.60590100 | 1.91532700  | 1.96015800  |
| Si | 0  | -2.58428300 | -1.92325900 | 1.95697700  |
| Si | 0  | -2.61128400 | -5.75561300 | 1.94309300  |
| Si | 0  | 2.60993900  | 5.75503700  | 1.94458300  |
| Si | 0  | 2.60447000  | 1.91899400  | 1.93902300  |
| Si | 0  | 2.62347800  | -1.92001400 | 1.93099300  |
| Si | 0  | 2.59472900  | -5.75660000 | 1.95434900  |
| Si | 0  | 5.03408500  | 5.74010200  | 1.96464800  |
| Si | 0  | 5.03400700  | 1.93898700  | 1.93822500  |
| Si | 0  | 5.04668500  | -1.94621200 | 1.93710600  |
| Si | 0  | 5.02338600  | -5.74460800 | 1.96409500  |
| O  | 0  | -5.32869700 | 5.60769900  | 3.62389200  |
| O  | 0  | -5.75219200 | 2.10242000  | 3.49155500  |
| O  | 0  | -5.59753700 | -1.86280200 | 3.54335000  |
| O  | 0  | -5.35941500 | -5.53599800 | 3.60089900  |
| O  | 0  | -2.14284800 | 5.74489000  | 3.57291200  |
| O  | 0  | -2.07107600 | 1.86335800  | 3.56251300  |
| O  | 0  | -1.95811200 | -1.98816700 | 3.51523800  |
| O  | 0  | -2.36927400 | -5.75043900 | 3.60872000  |
| O  | 0  | 2.36786900  | 5.75465500  | 3.61129000  |
| O  | 0  | 2.18375800  | 1.93755300  | 3.56503600  |
| O  | 0  | 2.39403800  | -1.91383800 | 3.59927600  |
| O  | 0  | 2.18821900  | -5.74025300 | 3.58126200  |

---

---

|    |   |             |             |            |
|----|---|-------------|-------------|------------|
| O  | 0 | 5.37016300  | 5.48727600  | 3.59690600 |
| O  | 0 | 5.35572400  | 2.05332900  | 3.58882800 |
| O  | 0 | 5.40483900  | -2.17561000 | 3.56613900 |
| O  | 0 | 5.34012900  | -5.57968400 | 3.61205500 |
| H  | 0 | -5.78003700 | 4.79498200  | 3.88892500 |
| H  | 0 | -5.78920300 | 1.29492900  | 4.02079800 |
| H  | 0 | -5.63685400 | -2.72269600 | 3.98372900 |
| H  | 0 | -4.57868400 | -5.71852700 | 4.14635100 |
| H  | 0 | -2.90937300 | 5.69799300  | 4.16258500 |
| H  | 0 | -1.14343200 | 2.10586700  | 3.68855200 |
| H  | 0 | -2.13364600 | -1.19995100 | 4.04692900 |
| H  | 0 | -1.48429800 | -5.55895700 | 3.94038700 |
| H  | 0 | 1.46275900  | 5.69222000  | 3.93884000 |
| H  | 0 | 2.96396200  | 1.93834500  | 4.13910500 |
| H  | 0 | 1.48705100  | -1.95912800 | 3.92515800 |
| H  | 0 | 2.97550300  | -5.68261200 | 4.14304900 |
| H  | 0 | 4.61105700  | 5.70735500  | 4.15850000 |
| H  | 0 | 5.67744300  | 2.92366300  | 3.86469000 |
| H  | 0 | 4.68041500  | -1.88978200 | 4.14303000 |
| H  | 0 | 5.64525400  | -4.69542400 | 3.86168800 |
| Si | 0 | -3.18445300 | 1.66265600  | 6.44181000 |
| Cl | 0 | -1.15747500 | 1.50340900  | 6.50416100 |
| Cl | 0 | -3.98835600 | 0.10644800  | 5.38140500 |
| Cl | 0 | -3.87757000 | 1.49458000  | 8.34913600 |
| Cl | 0 | -3.78018600 | 3.46176900  | 5.72303200 |

**TS1<sup>A-Si</sup>**

| <b>Atom</b> | <b>Fix/Relax</b> | <b>X</b>    | <b>Y</b>    | <b>Z</b>    |
|-------------|------------------|-------------|-------------|-------------|
| Si          | -1               | -3.84010000 | 5.76010000  | -1.97260000 |
| Si          | -1               | -3.84010000 | 1.92000000  | -1.97260000 |
| Si          | -1               | -3.84010000 | -1.92000000 | -1.97260000 |
| Si          | -1               | -3.84010000 | -5.76010000 | -1.97260000 |
| Si          | -1               | 0.00000000  | 5.76010000  | -1.97260000 |
| Si          | -1               | 0.00000000  | 1.92000000  | -1.97260000 |
| Si          | -1               | 0.00000000  | -1.92000000 | -1.97260000 |
| Si          | -1               | 0.00000000  | -5.76010000 | -1.97260000 |
| Si          | -1               | 3.84010000  | 5.76010000  | -1.97260000 |
| Si          | -1               | 3.84010000  | 1.92000000  | -1.97260000 |

---

---

|    |    |             |             |             |
|----|----|-------------|-------------|-------------|
| Si | -1 | 3.84010000  | -1.92000000 | -1.97260000 |
| Si | -1 | 3.84010000  | -5.76010000 | -1.97260000 |
| Si | -1 | -3.84010000 | 7.68020000  | -0.61490000 |
| Si | -1 | -3.84010000 | 3.84010000  | -0.61490000 |
| Si | -1 | -3.84010000 | 0.00000000  | -0.61490000 |
| Si | -1 | -3.84010000 | -3.84010000 | -0.61490000 |
| Si | -1 | -3.84010000 | -7.68020000 | -0.61490000 |
| Si | -1 | 0.00000000  | 7.68020000  | -0.61490000 |
| Si | -1 | 0.00000000  | 3.84010000  | -0.61490000 |
| Si | -1 | 0.00000000  | 0.00000000  | -0.61490000 |
| Si | -1 | 0.00000000  | -3.84010000 | -0.61490000 |
| Si | -1 | 0.00000000  | -7.68020000 | -0.61490000 |
| Si | -1 | 3.84010000  | 7.68020000  | -0.61490000 |
| Si | -1 | 3.84010000  | 3.84010000  | -0.61490000 |
| Si | -1 | 3.84010000  | 0.00000000  | -0.61490000 |
| Si | -1 | 3.84010000  | -3.84010000 | -0.61490000 |
| Si | -1 | 3.84010000  | -7.68020000 | -0.61490000 |
| Si | -1 | -5.76010000 | 7.68020000  | 0.74280000  |
| Si | -1 | -5.76010000 | 3.84010000  | 0.74280000  |
| Si | -1 | -5.76010000 | 0.00000000  | 0.74280000  |
| Si | -1 | -5.76010000 | -3.84010000 | 0.74280000  |
| Si | -1 | -5.76010000 | -7.68020000 | 0.74280000  |
| Si | -1 | -1.92000000 | 7.68020000  | 0.74280000  |
| Si | -1 | -1.92000000 | 3.84010000  | 0.74280000  |
| Si | -1 | -1.92000000 | 0.00000000  | 0.74280000  |
| Si | -1 | -1.92000000 | -3.84010000 | 0.74280000  |
| Si | -1 | -1.92000000 | -7.68020000 | 0.74280000  |
| Si | -1 | 1.92000000  | 7.68020000  | 0.74280000  |
| Si | -1 | 1.92000000  | 3.84010000  | 0.74280000  |
| Si | -1 | 1.92000000  | 0.00000000  | 0.74280000  |
| Si | -1 | 1.92000000  | -3.84010000 | 0.74280000  |
| Si | -1 | 1.92000000  | -7.68020000 | 0.74280000  |
| Si | -1 | 5.76010000  | 7.68020000  | 0.74280000  |
| Si | -1 | 5.76010000  | 3.84010000  | 0.74280000  |
| Si | -1 | 5.76010000  | 0.00000000  | 0.74280000  |
| Si | -1 | 5.76010000  | -3.84010000 | 0.74280000  |
| Si | -1 | 5.76010000  | -7.68020000 | 0.74280000  |
| H  | -1 | -2.97390000 | 5.79380000  | -3.16220000 |

---

---

|   |    |             |             |             |
|---|----|-------------|-------------|-------------|
| H | -1 | -5.23870000 | 5.77270000  | -2.51530000 |
| H | -1 | -2.98160000 | 1.92030000  | -3.17130000 |
| H | -1 | -5.23930000 | 1.92050000  | -2.51900000 |
| H | -1 | -2.98150000 | -1.92030000 | -3.17120000 |
| H | -1 | -5.23930000 | -1.92050000 | -2.51900000 |
| H | -1 | -2.97400000 | -5.79360000 | -3.16220000 |
| H | -1 | -5.23870000 | -5.77270000 | -2.51530000 |
| H | -1 | 1.16760000  | 5.71010000  | -2.86270000 |
| H | -1 | -1.16750000 | 5.71010000  | -2.86280000 |
| H | -1 | 1.17310000  | 1.91760000  | -2.85730000 |
| H | -1 | -1.17330000 | 1.91760000  | -2.85710000 |
| H | -1 | 1.17330000  | -1.91760000 | -2.85710000 |
| H | -1 | -1.17310000 | -1.91760000 | -2.85730000 |
| H | -1 | 1.16750000  | -5.71010000 | -2.86280000 |
| H | -1 | -1.16760000 | -5.71010000 | -2.86270000 |
| H | -1 | 5.23870000  | 5.77270000  | -2.51530000 |
| H | -1 | 2.97400000  | 5.79360000  | -3.16220000 |
| H | -1 | 5.23930000  | 1.92050000  | -2.51900000 |
| H | -1 | 2.98150000  | 1.92030000  | -3.17120000 |
| H | -1 | 5.23930000  | -1.92050000 | -2.51900000 |
| H | -1 | 2.98160000  | -1.92030000 | -3.17130000 |
| H | -1 | 5.23870000  | -5.77270000 | -2.51530000 |
| H | -1 | 2.97390000  | -5.79380000 | -3.16220000 |
| H | -1 | -3.82400000 | 8.85870000  | -1.53420000 |
| H | -1 | -3.82400000 | -8.85870000 | -1.53420000 |
| H | -1 | 0.00000000  | 8.92610000  | -1.42910000 |
| H | -1 | 0.00000000  | -8.92610000 | -1.42910000 |
| H | -1 | 3.82400000  | 8.85870000  | -1.53420000 |
| H | -1 | 3.82400000  | -8.85870000 | -1.53420000 |
| H | -1 | -7.00580000 | 7.40190000  | -0.01410000 |
| H | -1 | -5.87800000 | 8.93300000  | 1.52980000  |
| H | -1 | -7.05960000 | 3.84790000  | 0.03190000  |
| H | -1 | -7.05810000 | 0.00000000  | 0.02890000  |
| H | -1 | -7.05950000 | -3.84760000 | 0.03180000  |
| H | -1 | -5.87620000 | -8.93250000 | 1.53080000  |
| H | -1 | -7.00650000 | -7.40340000 | -0.01330000 |
| H | -1 | -1.90150000 | 8.88670000  | 1.61890000  |
| H | -1 | -1.90150000 | -8.88670000 | 1.61880000  |

---

---

|    |    |             |             |             |
|----|----|-------------|-------------|-------------|
| H  | -1 | 1.90150000  | 8.88670000  | 1.61880000  |
| H  | -1 | 1.90150000  | -8.88670000 | 1.61890000  |
| H  | -1 | 5.87620000  | 8.93250000  | 1.53080000  |
| H  | -1 | 7.00650000  | 7.40340000  | -0.01330000 |
| H  | -1 | 7.05950000  | 3.84760000  | 0.03180000  |
| H  | -1 | 7.05810000  | 0.00000000  | 0.02890000  |
| H  | -1 | 7.05960000  | -3.84790000 | 0.03190000  |
| H  | -1 | 7.00580000  | -7.40190000 | -0.01410000 |
| H  | -1 | 5.87800000  | -8.93300000 | 1.52980000  |
| Si | 0  | -5.06286300 | 5.75052000  | 1.99464200  |
| Si | 0  | -5.13579200 | 1.94833000  | 1.95817700  |
| Si | 0  | -5.05954000 | -1.93057300 | 1.96618200  |
| Si | 0  | -5.02906900 | -5.74538900 | 1.95915100  |
| Si | 0  | -2.61179600 | 5.72163200  | 1.95430700  |
| Si | 0  | -2.68277200 | 1.95510800  | 1.91196400  |
| Si | 0  | -2.59057300 | -1.96120300 | 1.96451900  |
| Si | 0  | -2.60351100 | -5.74376400 | 1.94983500  |
| Si | 0  | 2.59973700  | 5.74629400  | 1.95126700  |
| Si | 0  | 2.60557900  | 1.93336900  | 1.94496500  |
| Si | 0  | 2.61894900  | -1.91829800 | 1.93178600  |
| Si | 0  | 2.60135800  | -5.75173100 | 1.95526400  |
| Si | 0  | 5.02718800  | 5.74396800  | 1.95982700  |
| Si | 0  | 5.06147600  | 1.92846300  | 1.95216300  |
| Si | 0  | 5.04676000  | -1.94478500 | 1.93693800  |
| Si | 0  | 5.02836600  | -5.74643100 | 1.95974600  |
| O  | 0  | -5.52717400 | 5.65052600  | 3.59733800  |
| O  | 0  | -5.74278000 | 2.22358200  | 3.49057300  |
| O  | 0  | -5.60803000 | -1.90970900 | 3.54657100  |
| O  | 0  | -5.35429700 | -5.51207600 | 3.59484000  |
| O  | 0  | -2.02499700 | 5.31084200  | 3.49792600  |
| O  | 0  | -2.10733800 | 2.44723700  | 3.57672400  |
| O  | 0  | -1.94234200 | -2.26962300 | 3.48869000  |
| O  | 0  | -2.27186800 | -5.65410700 | 3.59691000  |
| O  | 0  | 2.27788500  | 5.69667100  | 3.60109200  |
| O  | 0  | 2.02198100  | 2.12283500  | 3.50695900  |
| O  | 0  | 2.34120200  | -1.86878600 | 3.59574600  |
| O  | 0  | 2.22698200  | -5.67184200 | 3.58617400  |
| O  | 0  | 5.34867800  | 5.51255300  | 3.59618800  |

---



---

|    |   |             |             |            |
|----|---|-------------|-------------|------------|
| O  | 0 | 5.57243000  | 1.93574200  | 3.54539500 |
| O  | 0 | 5.41028700  | -2.19585100 | 3.56169100 |
| O  | 0 | 5.34674700  | -5.59572600 | 3.60829700 |
| H  | 0 | -5.68886300 | 4.74981800  | 3.91489600 |
| H  | 0 | -5.55760500 | 1.54892300  | 4.15896100 |
| H  | 0 | -5.70859000 | -2.78338400 | 3.94880300 |
| H  | 0 | -4.57937600 | -5.71019500 | 4.14279100 |
| H  | 0 | -2.42218800 | 5.73263400  | 4.27136000 |
| H  | 0 | -1.80511100 | 3.39148800  | 3.55423900 |
| H  | 0 | -2.24105200 | -1.67930300 | 4.19474200 |
| H  | 0 | -1.82556500 | -4.84256600 | 3.87536100 |
| H  | 0 | 1.75224600  | 4.94817200  | 3.91307200 |
| H  | 0 | 2.21162900  | 1.41971900  | 4.13996100 |
| H  | 0 | 1.52700300  | -2.27721300 | 3.91410500 |
| H  | 0 | 3.02232000  | -5.73600700 | 4.13623100 |
| H  | 0 | 4.57447500  | 5.71411000  | 4.14404100 |
| H  | 0 | 5.64741500  | 2.81875700  | 3.93272600 |
| H  | 0 | 4.71246100  | -1.88028600 | 4.15404000 |
| H  | 0 | 5.63533600  | -4.70884900 | 3.86871200 |
| Cl | 0 | -0.44646800 | 3.07069200  | 5.59120200 |
| Si | 0 | -2.24147200 | 1.95368000  | 5.36195700 |
| Cl | 0 | -3.72217700 | 3.26630100  | 5.95413500 |
| Cl | 0 | -1.77754800 | 0.72813000  | 7.00638600 |
| Cl | 0 | -3.42930300 | 0.30684400  | 4.52306300 |

**Im2<sup>A</sup>-Si**

| Atom | Fix/Relax | X           | Y           | Z           |
|------|-----------|-------------|-------------|-------------|
| Si   | -1        | -3.84010000 | 5.76010000  | -1.97260000 |
| Si   | -1        | -3.84010000 | 1.92000000  | -1.97260000 |
| Si   | -1        | -3.84010000 | -1.92000000 | -1.97260000 |
| Si   | -1        | -3.84010000 | -5.76010000 | -1.97260000 |
| Si   | -1        | 0.00000000  | 5.76010000  | -1.97260000 |
| Si   | -1        | 0.00000000  | 1.92000000  | -1.97260000 |
| Si   | -1        | 0.00000000  | -1.92000000 | -1.97260000 |
| Si   | -1        | 0.00000000  | -5.76010000 | -1.97260000 |
| Si   | -1        | 3.84010000  | 5.76010000  | -1.97260000 |
| Si   | -1        | 3.84010000  | 1.92000000  | -1.97260000 |
| Si   | -1        | 3.84010000  | -1.92000000 | -1.97260000 |

---

---

|    |    |             |             |             |
|----|----|-------------|-------------|-------------|
| Si | -1 | 3.84010000  | -5.76010000 | -1.97260000 |
| Si | -1 | -3.84010000 | 7.68020000  | -0.61490000 |
| Si | -1 | -3.84010000 | 3.84010000  | -0.61490000 |
| Si | -1 | -3.84010000 | 0.00000000  | -0.61490000 |
| Si | -1 | -3.84010000 | -3.84010000 | -0.61490000 |
| Si | -1 | -3.84010000 | -7.68020000 | -0.61490000 |
| Si | -1 | 0.00000000  | 7.68020000  | -0.61490000 |
| Si | -1 | 0.00000000  | 3.84010100  | -0.61490100 |
| Si | -1 | 0.00000000  | 0.00000000  | -0.61489900 |
| Si | -1 | 0.00000000  | -3.84010000 | -0.61490000 |
| Si | -1 | 0.00000000  | -7.68020000 | -0.61490000 |
| Si | -1 | 3.84010000  | 7.68020000  | -0.61490000 |
| Si | -1 | 3.84010000  | 3.84010100  | -0.61489900 |
| Si | -1 | 3.84010000  | 0.00000100  | -0.61490000 |
| Si | -1 | 3.84010000  | -3.84010000 | -0.61490000 |
| Si | -1 | 3.84010000  | -7.68020000 | -0.61490000 |
| Si | -1 | -5.76009900 | 7.68020000  | 0.74280000  |
| Si | -1 | -5.76010000 | 3.84009900  | 0.74280000  |
| Si | -1 | -5.76010000 | 0.00000100  | 0.74280100  |
| Si | -1 | -5.76010100 | -3.84009900 | 0.74280000  |
| Si | -1 | -5.76010000 | -7.68020000 | 0.74280000  |
| Si | -1 | -1.92000000 | 7.68020000  | 0.74280000  |
| Si | -1 | -1.92000000 | 3.84010000  | 0.74280000  |
| Si | -1 | -1.92000100 | 0.00000000  | 0.74279900  |
| Si | -1 | -1.92000000 | -3.84010100 | 0.74280000  |
| Si | -1 | -1.91999800 | -7.68020000 | 0.74280100  |
| Si | -1 | 1.91999800  | 7.68020100  | 0.74280100  |
| Si | -1 | 1.92000300  | 3.84009600  | 0.74280000  |
| Si | -1 | 1.91999600  | -0.00000100 | 0.74279900  |
| Si | -1 | 1.92000100  | -3.84010000 | 0.74280000  |
| Si | -1 | 1.92000000  | -7.68020000 | 0.74280000  |
| Si | -1 | 5.76009900  | 7.68019900  | 0.74280000  |
| Si | -1 | 5.76010100  | 3.84010300  | 0.74279900  |
| Si | -1 | 5.76010000  | 0.00000000  | 0.74280200  |
| Si | -1 | 5.76010100  | -3.84010000 | 0.74280000  |
| Si | -1 | 5.76010000  | -7.68020000 | 0.74280000  |
| H  | -1 | -2.97390000 | 5.79380000  | -3.16220000 |
| H  | -1 | -5.23870000 | 5.77270000  | -2.51530000 |

---

---

|   |    |             |             |             |
|---|----|-------------|-------------|-------------|
| H | -1 | -2.98160000 | 1.92030000  | -3.17130000 |
| H | -1 | -5.23930000 | 1.92050000  | -2.51900000 |
| H | -1 | -2.98150000 | -1.92030000 | -3.17120000 |
| H | -1 | -5.23930000 | -1.92050000 | -2.51900000 |
| H | -1 | -2.97400000 | -5.79360000 | -3.16220000 |
| H | -1 | -5.23870000 | -5.77270000 | -2.51530000 |
| H | -1 | 1.16760000  | 5.71010000  | -2.86270000 |
| H | -1 | -1.16750000 | 5.71010000  | -2.86280000 |
| H | -1 | 1.17310000  | 1.91760000  | -2.85730000 |
| H | -1 | -1.17330000 | 1.91760000  | -2.85710000 |
| H | -1 | 1.17330000  | -1.91760000 | -2.85710000 |
| H | -1 | -1.17310000 | -1.91760000 | -2.85730000 |
| H | -1 | 1.16750000  | -5.71010000 | -2.86280000 |
| H | -1 | -1.16760000 | -5.71010000 | -2.86270000 |
| H | -1 | 5.23870000  | 5.77270000  | -2.51530000 |
| H | -1 | 2.97400000  | 5.79360000  | -3.16220000 |
| H | -1 | 5.23930000  | 1.92050000  | -2.51900000 |
| H | -1 | 2.98150000  | 1.92030000  | -3.17120000 |
| H | -1 | 5.23930000  | -1.92050000 | -2.51900000 |
| H | -1 | 2.98160000  | -1.92030000 | -3.17130000 |
| H | -1 | 5.23870000  | -5.77270000 | -2.51530000 |
| H | -1 | 2.97390000  | -5.79380000 | -3.16220000 |
| H | -1 | -3.82400000 | 8.85870000  | -1.53420000 |
| H | -1 | -3.82400000 | -8.85870000 | -1.53420000 |
| H | -1 | 0.00000000  | 8.92610000  | -1.42910000 |
| H | -1 | 0.00000000  | -8.92610000 | -1.42910000 |
| H | -1 | 3.82400000  | 8.85870000  | -1.53420000 |
| H | -1 | 3.82400000  | -8.85870000 | -1.53420000 |
| H | -1 | -7.00580000 | 7.40190000  | -0.01410000 |
| H | -1 | -5.87800000 | 8.93300000  | 1.52980000  |
| H | -1 | -7.05960000 | 3.84790000  | 0.03190000  |
| H | -1 | -7.05810000 | 0.00000000  | 0.02890000  |
| H | -1 | -7.05950000 | -3.84760000 | 0.03180000  |
| H | -1 | -5.87620000 | -8.93250000 | 1.53080000  |
| H | -1 | -7.00650000 | -7.40340000 | -0.01330000 |
| H | -1 | -1.90150000 | 8.88670000  | 1.61890000  |
| H | -1 | -1.90150100 | -8.88670000 | 1.61880000  |
| H | -1 | 1.90150100  | 8.88670000  | 1.61880000  |

---

---

|    |    |             |             |             |
|----|----|-------------|-------------|-------------|
| H  | -1 | 1.90150000  | -8.88670000 | 1.61890000  |
| H  | -1 | 5.87620000  | 8.93250000  | 1.53080000  |
| H  | -1 | 7.00650000  | 7.40340000  | -0.01330000 |
| H  | -1 | 7.05950000  | 3.84759900  | 0.03180000  |
| H  | -1 | 7.05810000  | 0.00000000  | 0.02889900  |
| H  | -1 | 7.05960000  | -3.84790000 | 0.03190000  |
| H  | -1 | 7.00580000  | -7.40190000 | -0.01410000 |
| H  | -1 | 5.87800000  | -8.93300000 | 1.52980000  |
| Si | 0  | -5.07125400 | 5.75194700  | 1.99070700  |
| Si | 0  | -5.12534900 | 1.95079500  | 1.96608300  |
| Si | 0  | -5.06226500 | -1.93263300 | 1.96923200  |
| Si | 0  | -5.02801800 | -5.74530700 | 1.95879800  |
| Si | 0  | -2.62272600 | 5.71966700  | 1.94227700  |
| Si | 0  | -2.68221000 | 1.95972400  | 1.89619900  |
| Si | 0  | -2.59122800 | -1.96898000 | 1.97013800  |
| Si | 0  | -2.60255900 | -5.74179700 | 1.94969300  |
| Si | 0  | 2.59467500  | 5.74228500  | 1.95385100  |
| Si | 0  | 2.59727000  | 1.93657200  | 1.95230400  |
| Si | 0  | 2.61406900  | -1.91838900 | 1.93510800  |
| Si | 0  | 2.60081800  | -5.75284400 | 1.95567700  |
| Si | 0  | 5.02422300  | 5.74483100  | 1.96010500  |
| Si | 0  | 5.05900500  | 1.92642800  | 1.95416900  |
| Si | 0  | 5.04490900  | -1.94455200 | 1.93889800  |
| Si | 0  | 5.02786800  | -5.74603900 | 1.95967200  |
| O  | 0  | -5.54214600 | 5.64672800  | 3.59113300  |
| O  | 0  | -5.65768100 | 2.24102400  | 3.52504700  |
| O  | 0  | -5.63615100 | -1.91559900 | 3.53869400  |
| O  | 0  | -5.35122100 | -5.51368500 | 3.59528200  |
| O  | 0  | -2.03738100 | 5.26016500  | 3.48155100  |
| O  | 0  | -2.12523700 | 2.51820700  | 3.58478300  |
| O  | 0  | -1.93480000 | -2.32428900 | 3.47729500  |
| O  | 0  | -2.26731700 | -5.63855300 | 3.59471600  |
| O  | 0  | 2.25229600  | 5.67743200  | 3.59850300  |
| O  | 0  | 2.00007300  | 2.16756100  | 3.50058600  |
| O  | 0  | 2.32041400  | -1.86841400 | 3.59463400  |
| O  | 0  | 2.22752900  | -5.68432100 | 3.58648800  |
| O  | 0  | 5.34489500  | 5.52616200  | 3.59776500  |
| O  | 0  | 5.59012400  | 1.91282700  | 3.53954800  |

---

---

|    |   |             |             |            |
|----|---|-------------|-------------|------------|
| O  | 0 | 5.41912500  | -2.19878200 | 3.56058100 |
| O  | 0 | 5.34685200  | -5.59307900 | 3.60788400 |
| H  | 0 | -5.72701700 | 4.74653600  | 3.89585200 |
| H  | 0 | -5.41951200 | 1.56795000  | 4.18064800 |
| H  | 0 | -5.71102100 | -2.78848300 | 3.94803300 |
| H  | 0 | -4.57134000 | -5.70212400 | 4.13976500 |
| H  | 0 | -2.26821500 | 5.77633300  | 4.26434200 |
| H  | 0 | -1.91345100 | 3.50101700  | 3.59718900 |
| H  | 0 | -2.16708400 | -1.69947500 | 4.17999000 |
| H  | 0 | -1.84453600 | -4.80985800 | 3.86192100 |
| H  | 0 | 1.78671400  | 4.88538200  | 3.90327300 |
| H  | 0 | 1.95273500  | 1.41897400  | 4.10874400 |
| H  | 0 | 1.48008600  | -2.23530400 | 3.89646800 |
| H  | 0 | 3.02487600  | -5.72735800 | 4.13564900 |
| H  | 0 | 4.56748100  | 5.72080900  | 4.14330600 |
| H  | 0 | 5.62080700  | 2.78375400  | 3.95787700 |
| H  | 0 | 4.74748000  | -1.84860200 | 4.16320900 |
| H  | 0 | 5.63231700  | -4.70478800 | 3.86724500 |
| Si | 0 | -1.77257300 | 1.73703400  | 5.13275600 |
| Cl | 0 | -0.33420100 | 0.23110800  | 5.05991100 |
| Cl | 0 | -3.37045300 | 0.26118000  | 4.47742100 |
| Cl | 0 | -2.86546100 | 2.09221300  | 6.85473200 |
| Cl | 0 | -0.37345900 | 3.31973300  | 5.53918300 |

**TS2<sup>A-Si</sup>**

| <b>Atom</b> | <b>Fix/Relax</b> | <b>X</b>    | <b>Y</b>    | <b>Z</b>    |
|-------------|------------------|-------------|-------------|-------------|
| Si          | -1               | -3.84010000 | 5.76010000  | -1.97260000 |
| Si          | -1               | -3.84010000 | 1.92000000  | -1.97260000 |
| Si          | -1               | -3.84010000 | -1.92000000 | -1.97260000 |
| Si          | -1               | -3.84010000 | -5.76010000 | -1.97260000 |
| Si          | -1               | 0.00000000  | 5.76010000  | -1.97260000 |
| Si          | -1               | 0.00000000  | 1.92000000  | -1.97260000 |
| Si          | -1               | 0.00000000  | -1.92000000 | -1.97260000 |
| Si          | -1               | 0.00000000  | -5.76010000 | -1.97260000 |
| Si          | -1               | 3.84010000  | 5.76010000  | -1.97260000 |
| Si          | -1               | 3.84010000  | 1.92000000  | -1.97260000 |
| Si          | -1               | 3.84010000  | -1.92000000 | -1.97260000 |
| Si          | -1               | 3.84010000  | -5.76010000 | -1.97260000 |

---

---

|    |    |             |             |             |
|----|----|-------------|-------------|-------------|
| Si | -1 | -3.84010000 | 7.68020000  | -0.61490000 |
| Si | -1 | -3.84010000 | 3.84010000  | -0.61490000 |
| Si | -1 | -3.84010000 | 0.00000000  | -0.61490000 |
| Si | -1 | -3.84010000 | -3.84010000 | -0.61490000 |
| Si | -1 | -3.84010000 | -7.68020000 | -0.61490000 |
| Si | -1 | 0.00000000  | 7.68020000  | -0.61490000 |
| Si | -1 | 0.00000000  | 3.84010000  | -0.61490000 |
| Si | -1 | 0.00000000  | 0.00000000  | -0.61490000 |
| Si | -1 | 0.00000000  | -3.84010000 | -0.61490000 |
| Si | -1 | 0.00000000  | -7.68020000 | -0.61490000 |
| Si | -1 | 3.84010000  | 7.68020000  | -0.61490000 |
| Si | -1 | 3.84010000  | 3.84010000  | -0.61490000 |
| Si | -1 | 3.84010000  | 0.00000000  | -0.61490000 |
| Si | -1 | 3.84010000  | -3.84010000 | -0.61490000 |
| Si | -1 | 3.84010000  | -7.68020000 | -0.61490000 |
| Si | -1 | -5.76010000 | 7.68020000  | 0.74280000  |
| Si | -1 | -5.76010000 | 3.84010000  | 0.74280000  |
| Si | -1 | -5.76010000 | 0.00000000  | 0.74280000  |
| Si | -1 | -5.76010000 | -3.84010000 | 0.74280000  |
| Si | -1 | -5.76010000 | -7.68020000 | 0.74280000  |
| Si | -1 | -1.92000000 | 7.68020000  | 0.74280000  |
| Si | -1 | -1.92000000 | 3.84010000  | 0.74280000  |
| Si | -1 | -1.92000000 | 0.00000000  | 0.74280000  |
| Si | -1 | -1.92000000 | -3.84010000 | 0.74280000  |
| Si | -1 | -1.92000000 | -7.68020000 | 0.74280000  |
| Si | -1 | 1.92000000  | 7.68020000  | 0.74280000  |
| Si | -1 | 1.92000000  | 3.84010000  | 0.74280000  |
| Si | -1 | 1.92000000  | 0.00000000  | 0.74280000  |
| Si | -1 | 1.92000000  | -3.84010000 | 0.74280000  |
| Si | -1 | 1.92000000  | -7.68020000 | 0.74280000  |
| Si | -1 | 5.76010000  | 7.68020000  | 0.74280000  |
| Si | -1 | 5.76010000  | 3.84010000  | 0.74280000  |
| Si | -1 | 5.76010000  | 0.00000000  | 0.74280000  |
| Si | -1 | 5.76010000  | -3.84010000 | 0.74280000  |
| Si | -1 | 5.76010000  | -7.68020000 | 0.74280000  |
| H  | -1 | -2.97390000 | 5.79380000  | -3.16220000 |
| H  | -1 | -5.23870000 | 5.77270000  | -2.51530000 |
| H  | -1 | -2.98160000 | 1.92030000  | -3.17130000 |

---

---

|   |    |             |             |             |
|---|----|-------------|-------------|-------------|
| H | -1 | -5.23930000 | 1.92050000  | -2.51900000 |
| H | -1 | -2.98150000 | -1.92030000 | -3.17120000 |
| H | -1 | -5.23930000 | -1.92050000 | -2.51900000 |
| H | -1 | -2.97400000 | -5.79360000 | -3.16220000 |
| H | -1 | -5.23870000 | -5.77270000 | -2.51530000 |
| H | -1 | 1.16760000  | 5.71010000  | -2.86270000 |
| H | -1 | -1.16750000 | 5.71010000  | -2.86280000 |
| H | -1 | 1.17310000  | 1.91760000  | -2.85730000 |
| H | -1 | -1.17330000 | 1.91760000  | -2.85710000 |
| H | -1 | 1.17330000  | -1.91760000 | -2.85710000 |
| H | -1 | -1.17310000 | -1.91760000 | -2.85730000 |
| H | -1 | 1.16750000  | -5.71010000 | -2.86280000 |
| H | -1 | -1.16760000 | -5.71010000 | -2.86270000 |
| H | -1 | 5.23870000  | 5.77270000  | -2.51530000 |
| H | -1 | 2.97400000  | 5.79360000  | -3.16220000 |
| H | -1 | 5.23930000  | 1.92050000  | -2.51900000 |
| H | -1 | 2.98150000  | 1.92030000  | -3.17120000 |
| H | -1 | 5.23930000  | -1.92050000 | -2.51900000 |
| H | -1 | 2.98160000  | -1.92030000 | -3.17130000 |
| H | -1 | 5.23870000  | -5.77270000 | -2.51530000 |
| H | -1 | 2.97390000  | -5.79380000 | -3.16220000 |
| H | -1 | -3.82400000 | 8.85870000  | -1.53420000 |
| H | -1 | -3.82400000 | -8.85870000 | -1.53420000 |
| H | -1 | 0.00000000  | 8.92610000  | -1.42910000 |
| H | -1 | 0.00000000  | -8.92610000 | -1.42910000 |
| H | -1 | 3.82400000  | 8.85870000  | -1.53420000 |
| H | -1 | 3.82400000  | -8.85870000 | -1.53420000 |
| H | -1 | -7.00580000 | 7.40190000  | -0.01410000 |
| H | -1 | -5.87800000 | 8.93300000  | 1.52980000  |
| H | -1 | -7.05960000 | 3.84790000  | 0.03190000  |
| H | -1 | -7.05810000 | 0.00000000  | 0.02890000  |
| H | -1 | -7.05950000 | -3.84760000 | 0.03180000  |
| H | -1 | -5.87620000 | -8.93250000 | 1.53080000  |
| H | -1 | -7.00650000 | -7.40340000 | -0.01330000 |
| H | -1 | -1.90150000 | 8.88670000  | 1.61890000  |
| H | -1 | -1.90150000 | -8.88670000 | 1.61880000  |
| H | -1 | 1.90150000  | 8.88670000  | 1.61880000  |
| H | -1 | 1.90150000  | -8.88670000 | 1.61890000  |

---

---

|    |    |             |             |             |
|----|----|-------------|-------------|-------------|
| H  | -1 | 5.87620000  | 8.93250000  | 1.53080000  |
| H  | -1 | 7.00650000  | 7.40340000  | -0.01330000 |
| H  | -1 | 7.05950000  | 3.84760000  | 0.03180000  |
| H  | -1 | 7.05810000  | 0.00000000  | 0.02890000  |
| H  | -1 | 7.05960000  | -3.84790000 | 0.03190000  |
| H  | -1 | 7.00580000  | -7.40190000 | -0.01410000 |
| H  | -1 | 5.87800000  | -8.93300000 | 1.52980000  |
| Si | 0  | -5.04884000 | 5.75414200  | 1.96152600  |
| Si | 0  | -5.14546000 | 1.93956800  | 1.95736700  |
| Si | 0  | -5.05361100 | -1.92824100 | 1.96880100  |
| Si | 0  | -5.03468600 | -5.74654100 | 1.96529000  |
| Si | 0  | -2.63051700 | 5.74475600  | 1.95282100  |
| Si | 0  | -2.71173100 | 1.94830000  | 1.83606100  |
| Si | 0  | -2.58522600 | -1.96059200 | 1.96340600  |
| Si | 0  | -2.61192700 | -5.75480000 | 1.94766600  |
| Si | 0  | 2.60768100  | 5.75111600  | 1.95630400  |
| Si | 0  | 2.64928900  | 1.92276800  | 1.93541500  |
| Si | 0  | 2.59747600  | -1.92119600 | 1.96346200  |
| Si | 0  | 2.59286800  | -5.75491900 | 1.95271100  |
| Si | 0  | 5.03537000  | 5.76749500  | 1.96927500  |
| Si | 0  | 5.06579500  | 1.90800900  | 1.92730900  |
| Si | 0  | 5.05688400  | -1.93225300 | 1.95101400  |
| Si | 0  | 5.02350400  | -5.74527400 | 1.96442500  |
| O  | 0  | -5.36555900 | 5.63566400  | 3.61160500  |
| O  | 0  | -5.68185500 | 2.17511800  | 3.52450600  |
| O  | 0  | -5.59608300 | -1.87409200 | 3.55559700  |
| O  | 0  | -5.36335600 | -5.51904300 | 3.59899600  |
| O  | 0  | -2.28139900 | 5.54334300  | 3.58091500  |
| O  | 0  | -2.17642600 | 2.42801600  | 3.56507400  |
| O  | 0  | -1.91902500 | -2.23662700 | 3.47665200  |
| O  | 0  | -2.37555100 | -5.74773100 | 3.61284200  |
| O  | 0  | 2.36248700  | 5.71718700  | 3.61095700  |
| O  | 0  | 2.52396900  | 1.91918300  | 3.60155300  |
| O  | 0  | 2.14230800  | -1.95784800 | 3.57669900  |
| O  | 0  | 2.17837200  | -5.72678900 | 3.57776900  |
| O  | 0  | 5.36297300  | 5.72208200  | 3.60440000  |
| O  | 0  | 5.39283600  | 1.77778200  | 3.56107100  |
| O  | 0  | 5.61063300  | -2.15162200 | 3.52210400  |

---



---

|    |   |             |             |            |
|----|---|-------------|-------------|------------|
| O  | 0 | 5.33454700  | -5.59559000 | 3.61407800 |
| H  | 0 | -5.74128800 | 4.79307800  | 3.90025500 |
| H  | 0 | -5.58323500 | 1.43167000  | 4.13417000 |
| H  | 0 | -5.70569200 | -2.74185800 | 3.96844500 |
| H  | 0 | -4.58501600 | -5.70399800 | 4.14736800 |
| H  | 0 | -3.04311700 | 5.72926800  | 4.15097100 |
| H  | 0 | -1.58959800 | 3.25541100  | 3.57377300 |
| H  | 0 | -2.25748100 | -1.70440300 | 4.20681100 |
| H  | 0 | -1.50641400 | -5.49769400 | 3.94746400 |
| H  | 0 | 1.55490900  | 5.31067400  | 3.96293500 |
| H  | 0 | 1.73893000  | 2.32425500  | 4.01242200 |
| H  | 0 | 1.27158500  | -2.33451000 | 3.75447100 |
| H  | 0 | 2.96286900  | -5.66372600 | 4.14318600 |
| H  | 0 | 4.55447700  | 5.65511200  | 4.13547400 |
| H  | 0 | 4.59616700  | 1.96675400  | 4.08436200 |
| H  | 0 | 5.40800000  | -1.43587000 | 4.13833000 |
| H  | 0 | 5.66563300  | -4.72555700 | 3.87890000 |
| Si | 0 | -1.74063100 | 1.54361500  | 4.97156900 |
| Cl | 0 | -0.17908900 | 0.27382000  | 4.73379400 |
| Cl | 0 | -3.39908900 | 0.24573500  | 4.84427300 |
| Cl | 0 | -2.05410000 | 2.41002300  | 6.76881200 |
| Cl | 0 | 0.08801300  | 3.55307300  | 4.58369200 |

**Im3<sup>A</sup>-Si**

| <b>Atom</b> | <b>Fix/Relax</b> | <b>X</b>    | <b>Y</b>    | <b>Z</b>    |
|-------------|------------------|-------------|-------------|-------------|
| Si          | -1               | -3.84010000 | 5.76010000  | -1.97260000 |
| Si          | -1               | -3.84010000 | 1.92000100  | -1.97260000 |
| Si          | -1               | -3.84010000 | -1.92000000 | -1.97260000 |
| Si          | -1               | -3.84010000 | -5.76010000 | -1.97260000 |
| Si          | -1               | 0.00000000  | 5.76010000  | -1.97260000 |
| Si          | -1               | 0.00000000  | 1.92000000  | -1.97260100 |
| Si          | -1               | 0.00000000  | -1.92000000 | -1.97260000 |
| Si          | -1               | 0.00000000  | -5.76010000 | -1.97260000 |
| Si          | -1               | 3.84010000  | 5.76010000  | -1.97260000 |
| Si          | -1               | 3.84010000  | 1.92000000  | -1.97260000 |
| Si          | -1               | 3.84010000  | -1.92000000 | -1.97260000 |
| Si          | -1               | 3.84010000  | -5.76010000 | -1.97260000 |
| Si          | -1               | -3.84010000 | 7.68020000  | -0.61490000 |

---

---

|    |    |             |             |             |
|----|----|-------------|-------------|-------------|
| Si | -1 | -3.84009900 | 3.84010100  | -0.61490100 |
| Si | -1 | -3.84009800 | -0.00000100 | -0.61490200 |
| Si | -1 | -3.84010000 | -3.84009900 | -0.61489900 |
| Si | -1 | -3.84010000 | -7.68020000 | -0.61490000 |
| Si | -1 | -0.00000100 | 7.68020100  | -0.61489800 |
| Si | -1 | -0.00000100 | 3.84009900  | -0.61489900 |
| Si | -1 | 0.00000100  | -0.00000200 | -0.61489900 |
| Si | -1 | 0.00000000  | -3.84009900 | -0.61490000 |
| Si | -1 | 0.00000000  | -7.68020000 | -0.61490000 |
| Si | -1 | 3.84010000  | 7.68019900  | -0.61490000 |
| Si | -1 | 3.84010000  | 3.84010000  | -0.61489900 |
| Si | -1 | 3.84010000  | -0.00000100 | -0.61490000 |
| Si | -1 | 3.84010000  | -3.84010000 | -0.61490000 |
| Si | -1 | 3.84010000  | -7.68020000 | -0.61490000 |
| Si | -1 | -5.76010100 | 7.68020300  | 0.74280000  |
| Si | -1 | -5.76009900 | 3.84010000  | 0.74280000  |
| Si | -1 | -5.76010400 | 0.00000100  | 0.74280000  |
| Si | -1 | -5.76009800 | -3.84010100 | 0.74279900  |
| Si | -1 | -5.76010000 | -7.68019900 | 0.74280100  |
| Si | -1 | -1.91999600 | 7.68020100  | 0.74279800  |
| Si | -1 | -1.92000600 | 3.84009700  | 0.74280700  |
| Si | -1 | -1.91999900 | 0.00000000  | 0.74279800  |
| Si | -1 | -1.91999900 | -3.84010300 | 0.74279900  |
| Si | -1 | -1.92000000 | -7.68019900 | 0.74280000  |
| Si | -1 | 1.92000000  | 7.68020100  | 0.74279700  |
| Si | -1 | 1.92000300  | 3.84010200  | 0.74280000  |
| Si | -1 | 1.92000000  | 0.00000200  | 0.74280100  |
| Si | -1 | 1.92000000  | -3.84010100 | 0.74280000  |
| Si | -1 | 1.92000000  | -7.68020000 | 0.74280000  |
| Si | -1 | 5.76010100  | 7.68020200  | 0.74279900  |
| Si | -1 | 5.76010000  | 3.84009900  | 0.74280000  |
| Si | -1 | 5.76010000  | 0.00000000  | 0.74280000  |
| Si | -1 | 5.76010000  | -3.84010000 | 0.74280000  |
| Si | -1 | 5.76010000  | -7.68020000 | 0.74280000  |
| H  | -1 | -2.97390000 | 5.79380000  | -3.16220000 |
| H  | -1 | -5.23870000 | 5.77270000  | -2.51530000 |
| H  | -1 | -2.98160000 | 1.92030000  | -3.17130000 |
| H  | -1 | -5.23930000 | 1.92050000  | -2.51900000 |

---

---

|   |    |             |             |             |
|---|----|-------------|-------------|-------------|
| H | -1 | -2.98150000 | -1.92030000 | -3.17120000 |
| H | -1 | -5.23930000 | -1.92050000 | -2.51900000 |
| H | -1 | -2.97400000 | -5.79360000 | -3.16220000 |
| H | -1 | -5.23870000 | -5.77270000 | -2.51530000 |
| H | -1 | 1.16760000  | 5.71010000  | -2.86270000 |
| H | -1 | -1.16750000 | 5.71010000  | -2.86280000 |
| H | -1 | 1.17310000  | 1.91760000  | -2.85730000 |
| H | -1 | -1.17330000 | 1.91760000  | -2.85710000 |
| H | -1 | 1.17330000  | -1.91760000 | -2.85710000 |
| H | -1 | -1.17310000 | -1.91760000 | -2.85730000 |
| H | -1 | 1.16750000  | -5.71010000 | -2.86280000 |
| H | -1 | -1.16760000 | -5.71010000 | -2.86270000 |
| H | -1 | 5.23870000  | 5.77270000  | -2.51530000 |
| H | -1 | 2.97400000  | 5.79360000  | -3.16220000 |
| H | -1 | 5.23930000  | 1.92050000  | -2.51900000 |
| H | -1 | 2.98150000  | 1.92030000  | -3.17120000 |
| H | -1 | 5.23930000  | -1.92050000 | -2.51900000 |
| H | -1 | 2.98160000  | -1.92030000 | -3.17130000 |
| H | -1 | 5.23870000  | -5.77270000 | -2.51530000 |
| H | -1 | 2.97390000  | -5.79380000 | -3.16220000 |
| H | -1 | -3.82400000 | 8.85870000  | -1.53420000 |
| H | -1 | -3.82400000 | -8.85870000 | -1.53420000 |
| H | -1 | 0.00000000  | 8.92610000  | -1.42910000 |
| H | -1 | 0.00000000  | -8.92610000 | -1.42910000 |
| H | -1 | 3.82400000  | 8.85870000  | -1.53420000 |
| H | -1 | 3.82400000  | -8.85870000 | -1.53420000 |
| H | -1 | -7.00580000 | 7.40189900  | -0.01410000 |
| H | -1 | -5.87800000 | 8.93300000  | 1.52980100  |
| H | -1 | -7.05960000 | 3.84789900  | 0.03190000  |
| H | -1 | -7.05809900 | 0.00000000  | 0.02889900  |
| H | -1 | -7.05950100 | -3.84759900 | 0.03180100  |
| H | -1 | -5.87620000 | -8.93250000 | 1.53080000  |
| H | -1 | -7.00650000 | -7.40340000 | -0.01330000 |
| H | -1 | -1.90150200 | 8.88670000  | 1.61890000  |
| H | -1 | -1.90150000 | -8.88670000 | 1.61880000  |
| H | -1 | 1.90150000  | 8.88670000  | 1.61880100  |
| H | -1 | 1.90150000  | -8.88670000 | 1.61890000  |
| H | -1 | 5.87619900  | 8.93250000  | 1.53080100  |

---

---

|    |    |             |             |             |
|----|----|-------------|-------------|-------------|
| H  | -1 | 7.00650000  | 7.40340000  | -0.01330000 |
| H  | -1 | 7.05950000  | 3.84760000  | 0.03180000  |
| H  | -1 | 7.05810000  | 0.00000000  | 0.02890000  |
| H  | -1 | 7.05960000  | -3.84790000 | 0.03190000  |
| H  | -1 | 7.00580000  | -7.40190000 | -0.01410000 |
| H  | -1 | 5.87800000  | -8.93300000 | 1.52980000  |
| Si | 0  | -5.04487400 | 5.74291300  | 1.96066700  |
| Si | 0  | -5.08776900 | 1.94102900  | 1.93893800  |
| Si | 0  | -5.04416900 | -1.93841600 | 1.94776300  |
| Si | 0  | -5.03243000 | -5.74005200 | 1.96601900  |
| Si | 0  | -2.63379100 | 5.75882900  | 1.91091300  |
| Si | 0  | -2.64592800 | 1.90746700  | 1.91364000  |
| Si | 0  | -2.60560400 | -1.91841000 | 1.95070600  |
| Si | 0  | -2.60835500 | -5.75471200 | 1.94590900  |
| Si | 0  | 2.62850200  | 5.75708700  | 1.94874500  |
| Si | 0  | 2.61127600  | 1.91879800  | 1.94668300  |
| Si | 0  | 2.62281200  | -1.91564300 | 1.93329400  |
| Si | 0  | 2.59243000  | -5.75818900 | 1.95397300  |
| Si | 0  | 5.04401700  | 5.74216400  | 1.95367200  |
| Si | 0  | 5.03674700  | 1.94043700  | 1.92673700  |
| Si | 0  | 5.04504700  | -1.94676600 | 1.93488100  |
| Si | 0  | 5.02258200  | -5.74387900 | 1.96544700  |
| O  | 0  | -5.28535600 | 5.56806500  | 3.62291300  |
| O  | 0  | -5.62814800 | 2.20207300  | 3.51115300  |
| O  | 0  | -5.44662300 | -2.02174200 | 3.58110500  |
| O  | 0  | -5.36756000 | -5.47781200 | 3.59717200  |
| O  | 0  | -2.29741300 | 5.72732500  | 3.59265900  |
| O  | 0  | -2.22375700 | 1.81736400  | 3.53909500  |
| O  | 0  | -2.14502500 | -1.91415000 | 3.56341300  |
| O  | 0  | -2.36438400 | -5.74323900 | 3.61127600  |
| O  | 0  | 2.47097300  | 5.78500000  | 3.61771000  |
| O  | 0  | 2.28571900  | 1.90282200  | 3.58842600  |
| O  | 0  | 2.40241700  | -1.88028900 | 3.60132400  |
| O  | 0  | 2.17309900  | -5.76224600 | 3.57682300  |
| O  | 0  | 5.36515600  | 5.49382400  | 3.58717000  |
| O  | 0  | 5.35496600  | 2.05658300  | 3.57952200  |
| O  | 0  | 5.39811900  | -2.17215500 | 3.56503400  |
| O  | 0  | 5.34280600  | -5.57805300 | 3.61183500  |

---

---

|    |   |             |             |            |
|----|---|-------------|-------------|------------|
| H  | 0 | -5.64902800 | 4.71122900  | 3.89083900 |
| H  | 0 | -5.60513900 | 1.45226000  | 4.12117400 |
| H  | 0 | -5.69884500 | -2.91039500 | 3.87205900 |
| H  | 0 | -4.60854300 | -5.69610500 | 4.15978700 |
| H  | 0 | -3.11082500 | 5.62397500  | 4.11977600 |
| H  | 0 | -1.13238900 | 4.84806600  | 3.95456100 |
| H  | 0 | -2.89284800 | -1.85492400 | 4.17531500 |
| H  | 0 | -1.46581700 | -5.61063500 | 3.93653700 |
| H  | 0 | 1.67597500  | 5.37675400  | 3.99560800 |
| H  | 0 | 3.10067000  | 1.94540900  | 4.11201300 |
| H  | 0 | 1.53544200  | -1.62440500 | 3.93908800 |
| H  | 0 | 2.94952500  | -5.66848600 | 4.14810700 |
| H  | 0 | 4.56916800  | 5.66815300  | 4.11688400 |
| H  | 0 | 5.68038700  | 2.92620800  | 3.85412500 |
| H  | 0 | 4.67590400  | -1.86945200 | 4.13679500 |
| H  | 0 | 5.64274300  | -4.69205200 | 3.86186200 |
| Si | 0 | -2.41989800 | 1.59850200  | 5.10480800 |
| Cl | 0 | -0.72604000 | 0.94537300  | 5.99926100 |
| Cl | 0 | -3.88878700 | 0.18095800  | 5.41988200 |
| Cl | 0 | -3.07670800 | 3.31620300  | 6.00061000 |
| Cl | 0 | -0.06046000 | 4.00701300  | 4.05408600 |

**P1<sup>A</sup>-Si**

| <b>Atom</b> | <b>Fix/Relax</b> | <b>X</b>    | <b>Y</b>    | <b>Z</b>    |
|-------------|------------------|-------------|-------------|-------------|
| Si          | -1               | -3.84010000 | 5.76010000  | -1.97260000 |
| Si          | -1               | -3.84010000 | 1.92000000  | -1.97260000 |
| Si          | -1               | -3.84010000 | -1.92000000 | -1.97260100 |
| Si          | -1               | -3.84010000 | -5.76010000 | -1.97260000 |
| Si          | -1               | 0.00000000  | 5.76010000  | -1.97260000 |
| Si          | -1               | 0.00000000  | 1.92000000  | -1.97259900 |
| Si          | -1               | 0.00000000  | -1.92000100 | -1.97259900 |
| Si          | -1               | 0.00000000  | -5.76010000 | -1.97260000 |
| Si          | -1               | 3.84010000  | 5.76010000  | -1.97260000 |
| Si          | -1               | 3.84010000  | 1.92000000  | -1.97260000 |
| Si          | -1               | 3.84010000  | -1.92000000 | -1.97260000 |
| Si          | -1               | 3.84010000  | -5.76010000 | -1.97260000 |
| Si          | -1               | -3.84010000 | 7.68020000  | -0.61490000 |
| Si          | -1               | -3.84010000 | 3.84009700  | -0.61490100 |

---

---

|    |    |             |             |             |
|----|----|-------------|-------------|-------------|
| Si | -1 | -3.84009900 | -0.00000100 | -0.61490000 |
| Si | -1 | -3.84010000 | -3.84010000 | -0.61490000 |
| Si | -1 | -3.84010000 | -7.68020000 | -0.61490000 |
| Si | -1 | 0.00000000  | 7.68020000  | -0.61490000 |
| Si | -1 | -0.00000200 | 3.84009800  | -0.61490100 |
| Si | -1 | -0.00000100 | 0.00000200  | -0.61490400 |
| Si | -1 | -0.00000100 | -3.84010000 | -0.61490100 |
| Si | -1 | 0.00000000  | -7.68020000 | -0.61490000 |
| Si | -1 | 3.84010000  | 7.68020000  | -0.61490000 |
| Si | -1 | 3.84010000  | 3.84010000  | -0.61490000 |
| Si | -1 | 3.84010000  | 0.00000000  | -0.61490000 |
| Si | -1 | 3.84010000  | -3.84010000 | -0.61490000 |
| Si | -1 | 3.84010000  | -7.68020000 | -0.61490000 |
| Si | -1 | -5.76010100 | 7.68020000  | 0.74280100  |
| Si | -1 | -5.76009800 | 3.84009600  | 0.74279500  |
| Si | -1 | -5.76009500 | 0.00000300  | 0.74278900  |
| Si | -1 | -5.76009900 | -3.84009900 | 0.74280000  |
| Si | -1 | -5.76010000 | -7.68020000 | 0.74280000  |
| Si | -1 | -1.92000200 | 7.68019700  | 0.74279800  |
| Si | -1 | -1.91999500 | 3.84011100  | 0.74280600  |
| Si | -1 | -1.92000600 | -0.00000700 | 0.74280500  |
| Si | -1 | -1.91999700 | -3.84010000 | 0.74280100  |
| Si | -1 | -1.92000000 | -7.68020000 | 0.74280000  |
| Si | -1 | 1.92000000  | 7.68020000  | 0.74280000  |
| Si | -1 | 1.92000000  | 3.84010000  | 0.74280000  |
| Si | -1 | 1.92000000  | 0.00000000  | 0.74280100  |
| Si | -1 | 1.92000000  | -3.84010000 | 0.74280000  |
| Si | -1 | 1.92000000  | -7.68020000 | 0.74280000  |
| Si | -1 | 5.76010000  | 7.68020000  | 0.74280000  |
| Si | -1 | 5.76010000  | 3.84010000  | 0.74280000  |
| Si | -1 | 5.76010000  | 0.00000000  | 0.74280000  |
| Si | -1 | 5.76010000  | -3.84010000 | 0.74280000  |
| Si | -1 | 5.76010000  | -7.68020000 | 0.74280000  |
| H  | -1 | -2.97390000 | 5.79380000  | -3.16220000 |
| H  | -1 | -5.23870000 | 5.77270000  | -2.51530000 |
| H  | -1 | -2.98160000 | 1.92030000  | -3.17130000 |
| H  | -1 | -5.23930000 | 1.92050000  | -2.51900000 |
| H  | -1 | -2.98150000 | -1.92030000 | -3.17120000 |

---

---

|   |    |             |             |             |
|---|----|-------------|-------------|-------------|
| H | -1 | -5.23930000 | -1.92050000 | -2.51900000 |
| H | -1 | -2.97400000 | -5.79360000 | -3.16220000 |
| H | -1 | -5.23870000 | -5.77270000 | -2.51530000 |
| H | -1 | 1.16760000  | 5.71010000  | -2.86270000 |
| H | -1 | -1.16750000 | 5.71010000  | -2.86280000 |
| H | -1 | 1.17310000  | 1.91760000  | -2.85730000 |
| H | -1 | -1.17330000 | 1.91760000  | -2.85710000 |
| H | -1 | 1.17330000  | -1.91760000 | -2.85710000 |
| H | -1 | -1.17310000 | -1.91760000 | -2.85730000 |
| H | -1 | 1.16750000  | -5.71010000 | -2.86280000 |
| H | -1 | -1.16760000 | -5.71010000 | -2.86270000 |
| H | -1 | 5.23870000  | 5.77270000  | -2.51530000 |
| H | -1 | 2.97400000  | 5.79360000  | -3.16220000 |
| H | -1 | 5.23930000  | 1.92050000  | -2.51900000 |
| H | -1 | 2.98150000  | 1.92030000  | -3.17120000 |
| H | -1 | 5.23930000  | -1.92050000 | -2.51900000 |
| H | -1 | 2.98160000  | -1.92030000 | -3.17130000 |
| H | -1 | 5.23870000  | -5.77270000 | -2.51530000 |
| H | -1 | 2.97390000  | -5.79380000 | -3.16220000 |
| H | -1 | -3.82400000 | 8.85870000  | -1.53420000 |
| H | -1 | -3.82400000 | -8.85870000 | -1.53420000 |
| H | -1 | 0.00000000  | 8.92610000  | -1.42910000 |
| H | -1 | 0.00000000  | -8.92610000 | -1.42910000 |
| H | -1 | 3.82400000  | 8.85870000  | -1.53420000 |
| H | -1 | 3.82400000  | -8.85870000 | -1.53420000 |
| H | -1 | -7.00580000 | 7.40190000  | -0.01410000 |
| H | -1 | -5.87799900 | 8.93300000  | 1.52980000  |
| H | -1 | -7.05960200 | 3.84790100  | 0.03190300  |
| H | -1 | -7.05810300 | -0.00000100 | 0.02890600  |
| H | -1 | -7.05950000 | -3.84760100 | 0.03180100  |
| H | -1 | -5.87620000 | -8.93250000 | 1.53080000  |
| H | -1 | -7.00650000 | -7.40340000 | -0.01330000 |
| H | -1 | -1.90149900 | 8.88670000  | 1.61890000  |
| H | -1 | -1.90150000 | -8.88670000 | 1.61880000  |
| H | -1 | 1.90150000  | 8.88670000  | 1.61880000  |
| H | -1 | 1.90150000  | -8.88670000 | 1.61890000  |
| H | -1 | 5.87620000  | 8.93250000  | 1.53080000  |
| H | -1 | 7.00650000  | 7.40340000  | -0.01330000 |

---

---

|    |    |             |             |             |
|----|----|-------------|-------------|-------------|
| H  | -1 | 7.05950000  | 3.84760000  | 0.03180000  |
| H  | -1 | 7.05810000  | 0.00000000  | 0.02890000  |
| H  | -1 | 7.05960000  | -3.84790000 | 0.03190000  |
| H  | -1 | 7.00580000  | -7.40190000 | -0.01410000 |
| H  | -1 | 5.87800000  | -8.93300000 | 1.52980000  |
| Si | 0  | -5.02571000 | 5.74531500  | 1.97074600  |
| Si | 0  | -5.08283000 | 1.94521700  | 1.94742500  |
| Si | 0  | -5.04127600 | -1.93898800 | 1.94575400  |
| Si | 0  | -5.03312500 | -5.73990600 | 1.96530000  |
| Si | 0  | -2.59483500 | 5.75674500  | 1.96044400  |
| Si | 0  | -2.62613300 | 1.91813600  | 1.91820700  |
| Si | 0  | -2.60472000 | -1.91802300 | 1.94393300  |
| Si | 0  | -2.60881200 | -5.75442600 | 1.94532000  |
| Si | 0  | 2.60735500  | 5.75362000  | 1.94549800  |
| Si | 0  | 2.61473300  | 1.91931100  | 1.94259400  |
| Si | 0  | 2.62317200  | -1.91604500 | 1.93288600  |
| Si | 0  | 2.59268100  | -5.75812200 | 1.95413200  |
| Si | 0  | 5.03186400  | 5.74038800  | 1.96511000  |
| Si | 0  | 5.03912500  | 1.93843200  | 1.92816600  |
| Si | 0  | 5.04536900  | -1.94695100 | 1.93570400  |
| Si | 0  | 5.02266900  | -5.74421700 | 1.96554200  |
| O  | 0  | -5.34874600 | 5.58819600  | 3.61591800  |
| O  | 0  | -5.64268300 | 2.22171300  | 3.50958900  |
| O  | 0  | -5.42046900 | -2.03699900 | 3.58522800  |
| O  | 0  | -5.37016000 | -5.47933900 | 3.59657100  |
| O  | 0  | -2.16895400 | 5.74011200  | 3.57966000  |
| O  | 0  | -2.10242200 | 1.92770800  | 3.52781100  |
| O  | 0  | -2.14619700 | -1.89805400 | 3.55849500  |
| O  | 0  | -2.36472000 | -5.74350800 | 3.61130200  |
| O  | 0  | 2.36316300  | 5.74103900  | 3.61043200  |
| O  | 0  | 2.26959900  | 1.92798500  | 3.58076500  |
| O  | 0  | 2.40019300  | -1.88022700 | 3.60068700  |
| O  | 0  | 2.17391100  | -5.76126400 | 3.57735600  |
| O  | 0  | 5.36583800  | 5.48556300  | 3.59719200  |
| O  | 0  | 5.35769000  | 2.04914000  | 3.58099200  |
| O  | 0  | 5.39954900  | -2.17069500 | 3.56582900  |
| O  | 0  | 5.34273000  | -5.57924000 | 3.61214400  |
| H  | 0  | -5.68766100 | 4.71973200  | 3.87592800  |

---



---

|    |   |             |             |            |
|----|---|-------------|-------------|------------|
| H  | 0 | -5.57117600 | 1.49383000  | 4.14098400 |
| H  | 0 | -5.70306200 | -2.92023000 | 3.86445500 |
| H  | 0 | -4.61423200 | -5.70365900 | 4.16080700 |
| H  | 0 | -2.93662300 | 5.64744500  | 4.16280700 |
| H  | 0 | -2.89910900 | -1.94241600 | 4.16586700 |
| H  | 0 | -1.46046900 | -5.65485700 | 3.93588200 |
| H  | 0 | 1.47695300  | 5.54866000  | 3.93960000 |
| H  | 0 | 3.07880500  | 1.93540600  | 4.11437300 |
| H  | 0 | 1.52210800  | -1.65736100 | 3.93319900 |
| H  | 0 | 2.95116700  | -5.67160200 | 4.14822100 |
| H  | 0 | 4.59962300  | 5.68863000  | 4.15588900 |
| H  | 0 | 5.67712500  | 2.91944200  | 3.85987500 |
| H  | 0 | 4.67661900  | -1.87102900 | 4.13814700 |
| H  | 0 | 5.64537200  | -4.69438700 | 3.86266500 |
| Si | 0 | -2.22304600 | 1.49456400  | 5.06060200 |
| Cl | 0 | -0.54863400 | 0.54622000  | 5.70494900 |
| Cl | 0 | -3.82392000 | 0.22107300  | 5.33005400 |
| Cl | 0 | -2.54989300 | 3.13448300  | 6.22511000 |

**Im1<sup>A-Al</sup>**

| <b>Atom</b> | <b>Fix/Relax</b> | <b>X</b>    | <b>Y</b>    | <b>Z</b>    |
|-------------|------------------|-------------|-------------|-------------|
| Si          | -1               | -3.84010000 | 5.76010000  | -1.97260000 |
| Si          | -1               | -3.84010000 | 1.92000000  | -1.97260000 |
| Si          | -1               | -3.84010000 | -1.92000000 | -1.97260000 |
| Si          | -1               | -3.84010000 | -5.76010000 | -1.97260000 |
| Si          | -1               | 0.00000000  | 5.76010000  | -1.97260000 |
| Si          | -1               | 0.00000000  | 1.92000000  | -1.97260000 |
| Si          | -1               | 0.00000000  | -1.92000000 | -1.97260000 |
| Si          | -1               | 0.00000000  | -5.76010000 | -1.97260000 |
| Si          | -1               | 3.84010000  | 5.76010000  | -1.97260000 |
| Si          | -1               | 3.84010000  | 1.92000000  | -1.97260000 |
| Si          | -1               | 3.84010000  | -1.92000000 | -1.97260000 |
| Si          | -1               | 3.84010000  | -5.76010000 | -1.97260000 |
| Si          | -1               | -3.84010000 | 7.68020000  | -0.61490000 |
| Si          | -1               | -3.84010000 | 3.84010000  | -0.61490000 |
| Si          | -1               | -3.84010000 | 0.00000000  | -0.61490000 |
| Si          | -1               | -3.84010000 | -3.84010000 | -0.61490000 |
| Si          | -1               | -3.84010000 | -7.68020000 | -0.61490000 |

---

---

|    |    |             |             |             |
|----|----|-------------|-------------|-------------|
| Si | -1 | 0.00000000  | 7.68020000  | -0.61490000 |
| Si | -1 | 0.00000000  | 3.84010000  | -0.61490000 |
| Si | -1 | 0.00000000  | 0.00000000  | -0.61490000 |
| Si | -1 | 0.00000000  | -3.84010000 | -0.61490000 |
| Si | -1 | 0.00000000  | -7.68020000 | -0.61490000 |
| Si | -1 | 3.84010000  | 7.68020000  | -0.61490000 |
| Si | -1 | 3.84010000  | 3.84010000  | -0.61490000 |
| Si | -1 | 3.84010000  | 0.00000000  | -0.61490000 |
| Si | -1 | 3.84010000  | -3.84010000 | -0.61490000 |
| Si | -1 | 3.84010000  | -7.68020000 | -0.61490000 |
| Si | -1 | -5.76010000 | 7.68020000  | 0.74280000  |
| Si | -1 | -5.76010000 | 3.84010000  | 0.74280000  |
| Si | -1 | -5.76010000 | 0.00000000  | 0.74280000  |
| Si | -1 | -5.76010000 | -3.84010000 | 0.74280000  |
| Si | -1 | -5.76010000 | -7.68020000 | 0.74280000  |
| Si | -1 | -1.92000000 | 7.68020000  | 0.74280000  |
| Si | -1 | -1.92000000 | 3.84010000  | 0.74280000  |
| Si | -1 | -1.92000000 | 0.00000000  | 0.74280000  |
| Si | -1 | -1.92000000 | -3.84010000 | 0.74280000  |
| Si | -1 | -1.92000000 | -7.68020000 | 0.74280000  |
| Si | -1 | 1.92000000  | 7.68020000  | 0.74280000  |
| Si | -1 | 1.92000000  | 3.84010000  | 0.74280000  |
| Si | -1 | 1.92000000  | 0.00000000  | 0.74280000  |
| Si | -1 | 1.92000000  | -3.84010000 | 0.74280000  |
| Si | -1 | 1.92000000  | -7.68020000 | 0.74280000  |
| Si | -1 | 5.76010000  | 7.68020000  | 0.74280000  |
| Si | -1 | 5.76010000  | 3.84010000  | 0.74280000  |
| Si | -1 | 5.76010000  | 0.00000000  | 0.74280000  |
| Si | -1 | 5.76010000  | -3.84010000 | 0.74280000  |
| Si | -1 | 5.76010000  | -7.68020000 | 0.74280000  |
| H  | -1 | -2.97390000 | 5.79380000  | -3.16220000 |
| H  | -1 | -5.23870000 | 5.77270000  | -2.51530000 |
| H  | -1 | -2.98160000 | 1.92030000  | -3.17130000 |
| H  | -1 | -5.23930000 | 1.92050000  | -2.51900000 |
| H  | -1 | -2.98150000 | -1.92030000 | -3.17120000 |
| H  | -1 | -5.23930000 | -1.92050000 | -2.51900000 |
| H  | -1 | -2.97400000 | -5.79360000 | -3.16220000 |
| H  | -1 | -5.23870000 | -5.77270000 | -2.51530000 |

---

---

|   |    |             |             |             |
|---|----|-------------|-------------|-------------|
| H | -1 | 1.16760000  | 5.71010000  | -2.86270000 |
| H | -1 | -1.16750000 | 5.71010000  | -2.86280000 |
| H | -1 | 1.17310000  | 1.91760000  | -2.85730000 |
| H | -1 | -1.17330000 | 1.91760000  | -2.85710000 |
| H | -1 | 1.17330000  | -1.91760000 | -2.85710000 |
| H | -1 | -1.17310000 | -1.91760000 | -2.85730000 |
| H | -1 | 1.16750000  | -5.71010000 | -2.86280000 |
| H | -1 | -1.16760000 | -5.71010000 | -2.86270000 |
| H | -1 | 5.23870000  | 5.77270000  | -2.51530000 |
| H | -1 | 2.97400000  | 5.79360000  | -3.16220000 |
| H | -1 | 5.23930000  | 1.92050000  | -2.51900000 |
| H | -1 | 2.98150000  | 1.92030000  | -3.17120000 |
| H | -1 | 5.23930000  | -1.92050000 | -2.51900000 |
| H | -1 | 2.98160000  | -1.92030000 | -3.17130000 |
| H | -1 | 5.23870000  | -5.77270000 | -2.51530000 |
| H | -1 | 2.97390000  | -5.79380000 | -3.16220000 |
| H | -1 | -3.82400000 | 8.85870000  | -1.53420000 |
| H | -1 | -3.82400000 | -8.85870000 | -1.53420000 |
| H | -1 | 0.00000000  | 8.92610000  | -1.42910000 |
| H | -1 | 0.00000000  | -8.92610000 | -1.42910000 |
| H | -1 | 3.82400000  | 8.85870000  | -1.53420000 |
| H | -1 | 3.82400000  | -8.85870000 | -1.53420000 |
| H | -1 | -7.00580000 | 7.40190000  | -0.01410000 |
| H | -1 | -5.87800000 | 8.93300000  | 1.52980000  |
| H | -1 | -7.05960000 | 3.84790000  | 0.03190000  |
| H | -1 | -7.05810000 | 0.00000000  | 0.02890000  |
| H | -1 | -7.05950000 | -3.84760000 | 0.03180000  |
| H | -1 | -5.87620000 | -8.93250000 | 1.53080000  |
| H | -1 | -7.00650000 | -7.40340000 | -0.01330000 |
| H | -1 | -1.90150000 | 8.88670000  | 1.61890000  |
| H | -1 | -1.90150000 | -8.88670000 | 1.61880000  |
| H | -1 | 1.90150000  | 8.88670000  | 1.61880000  |
| H | -1 | 1.90150000  | -8.88670000 | 1.61890000  |
| H | -1 | 5.87620000  | 8.93250000  | 1.53080000  |
| H | -1 | 7.00650000  | 7.40340000  | -0.01330000 |
| H | -1 | 7.05950000  | 3.84760000  | 0.03180000  |
| H | -1 | 7.05810000  | 0.00000000  | 0.02890000  |
| H | -1 | 7.05960000  | -3.84790000 | 0.03190000  |

---

---

|    |    |             |             |             |
|----|----|-------------|-------------|-------------|
| H  | -1 | 7.00580000  | -7.40190000 | -0.01410000 |
| H  | -1 | 5.87800000  | -8.93300000 | 1.52980000  |
| Si | 0  | -5.02897000 | 5.75683200  | 1.95845500  |
| Si | 0  | -5.07809400 | 1.92417900  | 1.95043800  |
| Si | 0  | -5.11462900 | -1.90489300 | 1.96280000  |
| Si | 0  | -5.04551000 | -5.76311000 | 1.97630500  |
| Si | 0  | -2.60305100 | 5.75017100  | 1.95402700  |
| Si | 0  | -2.62852400 | 1.88404800  | 1.94164000  |
| Si | 0  | -2.66773300 | -1.88061600 | 1.88830700  |
| Si | 0  | -2.62129500 | -5.77548600 | 1.95375900  |
| Si | 0  | 2.61039100  | 5.75345400  | 1.94428200  |
| Si | 0  | 2.61132500  | 1.92421200  | 1.94318700  |
| Si | 0  | 2.62669700  | -1.92176100 | 1.93851800  |
| Si | 0  | 2.59887300  | -5.75596700 | 1.95487400  |
| Si | 0  | 5.03406400  | 5.74082500  | 1.96375000  |
| Si | 0  | 5.04004700  | 1.93532200  | 1.93169100  |
| Si | 0  | 5.04768500  | -1.94448400 | 1.93113600  |
| Si | 0  | 5.02655800  | -5.74429300 | 1.96046500  |
| O  | 0  | -5.32212500 | 5.66553800  | 3.61719100  |
| O  | 0  | -5.61319500 | 2.02713100  | 3.53895000  |
| O  | 0  | -5.63065500 | -1.66170300 | 3.53143500  |
| O  | 0  | -5.39759400 | -5.65264600 | 3.60304500  |
| O  | 0  | -2.22812300 | 5.64042000  | 3.58751800  |
| O  | 0  | -2.10293700 | 1.44107700  | 3.50105000  |
| O  | 0  | -2.13222400 | -1.43584000 | 3.54608900  |
| O  | 0  | -2.37568200 | -5.86403400 | 3.60330000  |
| O  | 0  | 2.36869100  | 5.74567800  | 3.60990100  |
| O  | 0  | 2.23673300  | 1.99877400  | 3.57183800  |
| O  | 0  | 2.43689300  | -1.91460600 | 3.60538400  |
| O  | 0  | 2.21577900  | -5.72582900 | 3.58402900  |
| O  | 0  | 5.36321600  | 5.48999400  | 3.59644700  |
| O  | 0  | 5.37910100  | 2.02328600  | 3.57873600  |
| O  | 0  | 5.39151700  | -2.17671300 | 3.56106200  |
| O  | 0  | 5.34369500  | -5.58413000 | 3.60804200  |
| H  | 0  | -5.77973900 | 4.87315900  | 3.92401300  |
| H  | 0  | -5.69882200 | 1.18177500  | 3.99996500  |
| H  | 0  | -5.39156500 | -2.34173800 | 4.17966200  |
| H  | 0  | -4.60337500 | -5.64986400 | 4.16173800  |

---

---

|    |   |             |             |            |
|----|---|-------------|-------------|------------|
| H  | 0 | -3.01249600 | 5.78135200  | 4.13941100 |
| H  | 0 | -2.15330100 | 2.08085700  | 4.22198300 |
| H  | 0 | -2.04108200 | -0.45607800 | 3.66272300 |
| H  | 0 | -1.49679500 | -5.68534700 | 3.96446500 |
| H  | 0 | 1.50472300  | 5.47854800  | 3.94420800 |
| H  | 0 | 3.00796100  | 1.83271500  | 4.13330000 |
| H  | 0 | 1.67710800  | -2.37800700 | 3.98658700 |
| H  | 0 | 3.00660500  | -5.71098700 | 4.14379100 |
| H  | 0 | 4.59257500  | 5.68589400  | 4.15169000 |
| H  | 0 | 5.65253800  | 2.90268700  | 3.87668600 |
| H  | 0 | 4.63460800  | -1.93741500 | 4.11969500 |
| H  | 0 | 5.63606700  | -4.69691600 | 3.86312000 |
| Al | 0 | -1.80627000 | -2.42796500 | 5.06255500 |
| Cl | 0 | -0.18760600 | -3.71755700 | 4.48680900 |
| Cl | 0 | -3.62958900 | -3.47615500 | 5.41664300 |
| Cl | 0 | -1.29558900 | -0.97502300 | 6.50280700 |

**TS1<sup>A-Al</sup>**

| <b>Atom</b> | <b>Fix/Relax</b> | <b>X</b>    | <b>Y</b>    | <b>Z</b>    |
|-------------|------------------|-------------|-------------|-------------|
| Si          | -1               | -3.84010000 | 5.76010000  | -1.97260000 |
| Si          | -1               | -3.84010000 | 1.92000000  | -1.97260000 |
| Si          | -1               | -3.84010000 | -1.92000000 | -1.97260000 |
| Si          | -1               | -3.84010000 | -5.76010000 | -1.97260000 |
| Si          | -1               | 0.00000000  | 5.76010000  | -1.97260000 |
| Si          | -1               | 0.00000000  | 1.92000000  | -1.97260000 |
| Si          | -1               | 0.00000000  | -1.92000000 | -1.97260000 |
| Si          | -1               | 0.00000000  | -5.76010000 | -1.97260000 |
| Si          | -1               | 3.84010000  | 5.76010000  | -1.97260000 |
| Si          | -1               | 3.84010000  | 1.92000000  | -1.97260000 |
| Si          | -1               | 3.84010000  | -1.92000000 | -1.97260000 |
| Si          | -1               | 3.84010000  | -5.76010000 | -1.97260000 |
| Si          | -1               | -3.84010000 | 7.68020000  | -0.61490000 |
| Si          | -1               | -3.84010000 | 3.84010000  | -0.61490000 |
| Si          | -1               | -3.84010000 | 0.00000000  | -0.61490000 |
| Si          | -1               | -3.84010000 | -3.84010000 | -0.61490000 |
| Si          | -1               | -3.84010000 | -7.68020000 | -0.61490000 |
| Si          | -1               | 0.00000000  | 7.68020000  | -0.61490000 |
| Si          | -1               | 0.00000000  | 3.84010000  | -0.61490000 |

---

---

|    |    |             |             |             |
|----|----|-------------|-------------|-------------|
| Si | -1 | 0.00000000  | 0.00000000  | -0.61490000 |
| Si | -1 | 0.00000000  | -3.84010000 | -0.61490000 |
| Si | -1 | 0.00000000  | -7.68020000 | -0.61490000 |
| Si | -1 | 3.84010000  | 7.68020000  | -0.61490000 |
| Si | -1 | 3.84010000  | 3.84010000  | -0.61490000 |
| Si | -1 | 3.84010000  | 0.00000000  | -0.61490000 |
| Si | -1 | 3.84010000  | -3.84010000 | -0.61490000 |
| Si | -1 | 3.84010000  | -7.68020000 | -0.61490000 |
| Si | -1 | -5.76010000 | 7.68020000  | 0.74280000  |
| Si | -1 | -5.76010000 | 3.84010000  | 0.74280000  |
| Si | -1 | -5.76010000 | 0.00000000  | 0.74280000  |
| Si | -1 | -5.76010000 | -3.84010000 | 0.74280000  |
| Si | -1 | -5.76010000 | -7.68020000 | 0.74280000  |
| Si | -1 | -1.92000000 | 7.68020000  | 0.74280000  |
| Si | -1 | -1.92000000 | 3.84010000  | 0.74280000  |
| Si | -1 | -1.92000000 | 0.00000000  | 0.74280000  |
| Si | -1 | -1.92000000 | -3.84010000 | 0.74280000  |
| Si | -1 | -1.92000000 | -7.68020000 | 0.74280000  |
| Si | -1 | 1.92000000  | 7.68020000  | 0.74280000  |
| Si | -1 | 1.92000000  | 3.84010000  | 0.74280000  |
| Si | -1 | 1.92000000  | 0.00000000  | 0.74280000  |
| Si | -1 | 1.92000000  | -3.84010000 | 0.74280000  |
| Si | -1 | 1.92000000  | -7.68020000 | 0.74280000  |
| Si | -1 | 5.76010000  | 7.68020000  | 0.74280000  |
| Si | -1 | 5.76010000  | 3.84010000  | 0.74280000  |
| Si | -1 | 5.76010000  | 0.00000000  | 0.74280000  |
| Si | -1 | 5.76010000  | -3.84010000 | 0.74280000  |
| Si | -1 | 5.76010000  | -7.68020000 | 0.74280000  |
| H  | -1 | -2.97390000 | 5.79380000  | -3.16220000 |
| H  | -1 | -5.23870000 | 5.77270000  | -2.51530000 |
| H  | -1 | -2.98160000 | 1.92030000  | -3.17130000 |
| H  | -1 | -5.23930000 | 1.92050000  | -2.51900000 |
| H  | -1 | -2.98150000 | -1.92030000 | -3.17120000 |
| H  | -1 | -5.23930000 | -1.92050000 | -2.51900000 |
| H  | -1 | -2.97400000 | -5.79360000 | -3.16220000 |
| H  | -1 | -5.23870000 | -5.77270000 | -2.51530000 |
| H  | -1 | 1.16760000  | 5.71010000  | -2.86270000 |
| H  | -1 | -1.16750000 | 5.71010000  | -2.86280000 |

---

---

|   |    |             |             |             |
|---|----|-------------|-------------|-------------|
| H | -1 | 1.17310000  | 1.91760000  | -2.85730000 |
| H | -1 | -1.17330000 | 1.91760000  | -2.85710000 |
| H | -1 | 1.17330000  | -1.91760000 | -2.85710000 |
| H | -1 | -1.17310000 | -1.91760000 | -2.85730000 |
| H | -1 | 1.16750000  | -5.71010000 | -2.86280000 |
| H | -1 | -1.16760000 | -5.71010000 | -2.86270000 |
| H | -1 | 5.23870000  | 5.77270000  | -2.51530000 |
| H | -1 | 2.97400000  | 5.79360000  | -3.16220000 |
| H | -1 | 5.23930000  | 1.92050000  | -2.51900000 |
| H | -1 | 2.98150000  | 1.92030000  | -3.17120000 |
| H | -1 | 5.23930000  | -1.92050000 | -2.51900000 |
| H | -1 | 2.98160000  | -1.92030000 | -3.17130000 |
| H | -1 | 5.23870000  | -5.77270000 | -2.51530000 |
| H | -1 | 2.97390000  | -5.79380000 | -3.16220000 |
| H | -1 | -3.82400000 | 8.85870000  | -1.53420000 |
| H | -1 | -3.82400000 | -8.85870000 | -1.53420000 |
| H | -1 | 0.00000000  | 8.92610000  | -1.42910000 |
| H | -1 | 0.00000000  | -8.92610000 | -1.42910000 |
| H | -1 | 3.82400000  | 8.85870000  | -1.53420000 |
| H | -1 | 3.82400000  | -8.85870000 | -1.53420000 |
| H | -1 | -7.00580000 | 7.40190000  | -0.01410000 |
| H | -1 | -5.87800000 | 8.93300000  | 1.52980000  |
| H | -1 | -7.05960000 | 3.84790000  | 0.03190000  |
| H | -1 | -7.05810000 | 0.00000000  | 0.02890000  |
| H | -1 | -7.05950000 | -3.84760000 | 0.03180000  |
| H | -1 | -5.87620000 | -8.93250000 | 1.53080000  |
| H | -1 | -7.00650000 | -7.40340000 | -0.01330000 |
| H | -1 | -1.90150000 | 8.88670000  | 1.61890000  |
| H | -1 | -1.90150000 | -8.88670000 | 1.61880000  |
| H | -1 | 1.90150000  | 8.88670000  | 1.61880000  |
| H | -1 | 1.90150000  | -8.88670000 | 1.61890000  |
| H | -1 | 5.87620000  | 8.93250000  | 1.53080000  |
| H | -1 | 7.00650000  | 7.40340000  | -0.01330000 |
| H | -1 | 7.05950000  | 3.84760000  | 0.03180000  |
| H | -1 | 7.05810000  | 0.00000000  | 0.02890000  |
| H | -1 | 7.05960000  | -3.84790000 | 0.03190000  |
| H | -1 | 7.00580000  | -7.40190000 | -0.01410000 |
| H | -1 | 5.87800000  | -8.93300000 | 1.52980000  |

---

---

|    |   |             |             |            |
|----|---|-------------|-------------|------------|
| Si | 0 | -5.02468900 | 5.74484400  | 1.96965200 |
| Si | 0 | -5.05831700 | 1.94656200  | 1.94115900 |
| Si | 0 | -5.09128200 | -1.90614500 | 1.97078300 |
| Si | 0 | -5.10759800 | -5.77753200 | 2.01635100 |
| Si | 0 | -2.59367900 | 5.75946600  | 1.95699400 |
| Si | 0 | -2.63672100 | 1.91844900  | 1.95440500 |
| Si | 0 | -2.63338600 | -1.95547600 | 1.87961100 |
| Si | 0 | -2.60820800 | -5.69745900 | 1.95545100 |
| Si | 0 | 2.60844000  | 5.75475100  | 1.94569900 |
| Si | 0 | 2.61330700  | 1.91814700  | 1.94005400 |
| Si | 0 | 2.62202000  | -1.91937800 | 1.93785500 |
| Si | 0 | 2.54044800  | -5.75904200 | 1.97674900 |
| Si | 0 | 5.03321200  | 5.74108600  | 1.96545900 |
| Si | 0 | 5.03831200  | 1.93926300  | 1.93151300 |
| Si | 0 | 5.04787100  | -1.94760000 | 1.93375900 |
| Si | 0 | 5.03341400  | -5.75093600 | 2.00600700 |
| O  | 0 | -5.35000800 | 5.58323900  | 3.61302200 |
| O  | 0 | -5.43277000 | 2.17247900  | 3.56010500 |
| O  | 0 | -5.59477700 | -1.72619300 | 3.54297000 |
| O  | 0 | -5.69841900 | -5.94549300 | 3.55446600 |
| O  | 0 | -2.16288300 | 5.75965000  | 3.57512500 |
| O  | 0 | -2.45860900 | 1.85308100  | 3.61868200 |
| O  | 0 | -1.94733300 | -2.28389600 | 3.44683500 |
| O  | 0 | -1.85126800 | -5.30182600 | 3.54845300 |
| O  | 0 | 2.36397000  | 5.74129300  | 3.61054600 |
| O  | 0 | 2.23707500  | 1.88667500  | 3.57199400 |
| O  | 0 | 2.40452600  | -1.95813700 | 3.60813400 |
| O  | 0 | 1.74742300  | -5.84658700 | 3.45727300 |
| O  | 0 | 5.37182000  | 5.48825800  | 3.59609000 |
| O  | 0 | 5.34942600  | 2.04887100  | 3.58436900 |
| O  | 0 | 5.40147400  | -2.17056400 | 3.56193600 |
| O  | 0 | 5.57505000  | -5.64404600 | 3.58255300 |
| H  | 0 | -5.64679000 | 4.69896300  | 3.87280400 |
| H  | 0 | -4.76739700 | 1.79442200  | 4.15624100 |
| H  | 0 | -5.18990000 | -2.26193600 | 4.23926900 |
| H  | 0 | -5.36221500 | -5.35702900 | 4.24362200 |
| H  | 0 | -2.92979400 | 5.65869100  | 4.15761200 |
| H  | 0 | -1.64158200 | 1.56093400  | 4.04097600 |

---



---

|    |   |             |             |            |
|----|---|-------------|-------------|------------|
| H  | 0 | -1.91892300 | -1.50498600 | 4.22745400 |
| H  | 0 | -0.97680700 | -5.71566500 | 3.68410300 |
| H  | 0 | 1.46414300  | 5.62501800  | 3.93855200 |
| H  | 0 | 3.02988500  | 1.95166500  | 4.12572700 |
| H  | 0 | 1.56618700  | -1.67899200 | 3.99686300 |
| H  | 0 | 1.91164000  | -5.13344600 | 4.08905600 |
| H  | 0 | 4.61264100  | 5.70072400  | 4.16053500 |
| H  | 0 | 5.69646200  | 2.90757600  | 3.86542800 |
| H  | 0 | 4.68486300  | -1.86856100 | 4.14059100 |
| H  | 0 | 5.69612600  | -4.73717300 | 3.89734600 |
| Al | 0 | -1.92492200 | -3.67599400 | 4.63070100 |
| Cl | 0 | -0.09168800 | -4.10162500 | 5.60699700 |
| Cl | 0 | -3.90459600 | -3.96789600 | 5.40153500 |
| Cl | 0 | -1.82952800 | -1.05926700 | 5.81835700 |

**Im2<sup>A-Al</sup>**

| <b>Atom</b> | <b>Fix/Relax</b> | <b>X</b>    | <b>Y</b>    | <b>Z</b>    |
|-------------|------------------|-------------|-------------|-------------|
| Si          | -1               | -3.84010000 | 5.76010100  | -1.97259700 |
| Si          | -1               | -3.84010100 | 1.91999600  | -1.97260700 |
| Si          | -1               | -3.84009700 | -1.91997700 | -1.97258900 |
| Si          | -1               | -3.84010600 | -5.76009700 | -1.97259100 |
| Si          | -1               | 0.00000100  | 5.76010100  | -1.97259900 |
| Si          | -1               | 0.00000100  | 1.92000200  | -1.97259600 |
| Si          | -1               | 0.00000100  | -1.92000300 | -1.97259700 |
| Si          | -1               | -0.00001000 | -5.76010300 | -1.97261700 |
| Si          | -1               | 3.84010000  | 5.76010000  | -1.97260000 |
| Si          | -1               | 3.84010000  | 1.92000000  | -1.97260000 |
| Si          | -1               | 3.84010000  | -1.92000000 | -1.97260000 |
| Si          | -1               | 3.84010000  | -5.76010000 | -1.97260000 |
| Si          | -1               | -3.84010000 | 7.68020300  | -0.61490100 |
| Si          | -1               | -3.84010500 | 3.84011200  | -0.61491100 |
| Si          | -1               | -3.84013100 | 0.00004800  | -0.61489400 |
| Si          | -1               | -3.84006600 | -3.84012500 | -0.61491700 |
| Si          | -1               | -3.84009900 | -7.68022900 | -0.61493500 |
| Si          | -1               | 0.00000200  | 7.68020000  | -0.61489800 |
| Si          | -1               | -0.00000200 | 3.84011000  | -0.61490300 |
| Si          | -1               | -0.00002500 | 0.00001800  | -0.61493700 |
| Si          | -1               | 0.00004900  | -3.84009300 | -0.61483100 |

---

---

|    |    |             |             |             |
|----|----|-------------|-------------|-------------|
| Si | -1 | 0.00003500  | -7.68025100 | -0.61485300 |
| Si | -1 | 3.84010000  | 7.68020000  | -0.61490000 |
| Si | -1 | 3.84010000  | 3.84010000  | -0.61490000 |
| Si | -1 | 3.84009900  | 0.00000000  | -0.61490000 |
| Si | -1 | 3.84010000  | -3.84009900 | -0.61489800 |
| Si | -1 | 3.84009900  | -7.68019900 | -0.61490100 |
| Si | -1 | -5.76011000 | 7.68020900  | 0.74279300  |
| Si | -1 | -5.76009200 | 3.84009400  | 0.74280700  |
| Si | -1 | -5.75997100 | -0.00006900 | 0.74286600  |
| Si | -1 | -5.76008500 | -3.84023000 | 0.74265100  |
| Si | -1 | -5.76007400 | -7.68016400 | 0.74292200  |
| Si | -1 | -1.92000900 | 7.68020500  | 0.74279600  |
| Si | -1 | -1.91998500 | 3.84010700  | 0.74278100  |
| Si | -1 | -1.92004000 | -0.00013300 | 0.74289700  |
| Si | -1 | -1.92000800 | -3.84024700 | 0.74264200  |
| Si | -1 | -1.92016900 | -7.67980400 | 0.74280200  |
| Si | -1 | 1.92000100  | 7.68019900  | 0.74279900  |
| Si | -1 | 1.92000200  | 3.84010100  | 0.74279900  |
| Si | -1 | 1.91999700  | -0.00000600 | 0.74280000  |
| Si | -1 | 1.92000400  | -3.84011000 | 0.74280000  |
| Si | -1 | 1.91999300  | -7.68017700 | 0.74279600  |
| Si | -1 | 5.76010100  | 7.68020000  | 0.74280000  |
| Si | -1 | 5.76010100  | 3.84010000  | 0.74280000  |
| Si | -1 | 5.76009800  | -0.00000100 | 0.74280200  |
| Si | -1 | 5.76010000  | -3.84009900 | 0.74280400  |
| Si | -1 | 5.76010000  | -7.68019700 | 0.74280600  |
| H  | -1 | -2.97390000 | 5.79380000  | -3.16220000 |
| H  | -1 | -5.23870000 | 5.77270000  | -2.51530000 |
| H  | -1 | -2.98160000 | 1.92030000  | -3.17130000 |
| H  | -1 | -5.23930000 | 1.92050000  | -2.51900000 |
| H  | -1 | -2.98150000 | -1.92030000 | -3.17120000 |
| H  | -1 | -5.23930000 | -1.92050000 | -2.51900000 |
| H  | -1 | -2.97400000 | -5.79360000 | -3.16220000 |
| H  | -1 | -5.23870000 | -5.77270000 | -2.51530000 |
| H  | -1 | 1.16760000  | 5.71010000  | -2.86270000 |
| H  | -1 | -1.16750000 | 5.71010000  | -2.86280000 |
| H  | -1 | 1.17310000  | 1.91760000  | -2.85730000 |
| H  | -1 | -1.17330000 | 1.91760000  | -2.85710000 |

---

---

|    |    |             |             |             |
|----|----|-------------|-------------|-------------|
| H  | -1 | 1.17330000  | -1.91760000 | -2.85710000 |
| H  | -1 | -1.17310000 | -1.91760000 | -2.85730000 |
| H  | -1 | 1.16750000  | -5.71010000 | -2.86280000 |
| H  | -1 | -1.16760000 | -5.71010000 | -2.86270000 |
| H  | -1 | 5.23870000  | 5.77270000  | -2.51530000 |
| H  | -1 | 2.97400000  | 5.79360000  | -3.16220000 |
| H  | -1 | 5.23930000  | 1.92050000  | -2.51900000 |
| H  | -1 | 2.98150000  | 1.92030000  | -3.17120000 |
| H  | -1 | 5.23930000  | -1.92050000 | -2.51900000 |
| H  | -1 | 2.98160000  | -1.92030000 | -3.17130000 |
| H  | -1 | 5.23870000  | -5.77270000 | -2.51530000 |
| H  | -1 | 2.97390000  | -5.79380000 | -3.16220000 |
| H  | -1 | -3.82399800 | 8.85870000  | -1.53420000 |
| H  | -1 | -3.82401100 | -8.85870600 | -1.53419200 |
| H  | -1 | 0.00000100  | 8.92610100  | -1.42909800 |
| H  | -1 | 0.00000600  | -8.92611000 | -1.42908400 |
| H  | -1 | 3.82400000  | 8.85870000  | -1.53420000 |
| H  | -1 | 3.82400100  | -8.85870100 | -1.53419900 |
| H  | -1 | -7.00579900 | 7.40190300  | -0.01410200 |
| H  | -1 | -5.87800100 | 8.93300100  | 1.52979800  |
| H  | -1 | -7.05959900 | 3.84791100  | 0.03189800  |
| H  | -1 | -7.05811400 | 0.00001500  | 0.02892600  |
| H  | -1 | -7.05951600 | -3.84758200 | 0.03182900  |
| H  | -1 | -5.87620200 | -8.93251400 | 1.53077700  |
| H  | -1 | -7.00649200 | -7.40339600 | -0.01331200 |
| H  | -1 | -1.90150200 | 8.88670000  | 1.61890000  |
| H  | -1 | -1.90147900 | -8.88671400 | 1.61878100  |
| H  | -1 | 1.90150000  | 8.88670000  | 1.61880000  |
| H  | -1 | 1.90150900  | -8.88670300 | 1.61889700  |
| H  | -1 | 5.87620000  | 8.93250000  | 1.53080000  |
| H  | -1 | 7.00650000  | 7.40340000  | -0.01330000 |
| H  | -1 | 7.05950000  | 3.84760000  | 0.03180000  |
| H  | -1 | 7.05810000  | -0.00000100 | 0.02890000  |
| H  | -1 | 7.05959900  | -3.84790100 | 0.03189800  |
| H  | -1 | 7.00579800  | -7.40189900 | -0.01410200 |
| H  | -1 | 5.87799900  | -8.93300000 | 1.52979900  |
| Si | 0  | -5.02362900 | 5.74004000  | 1.97083700  |
| Si | 0  | -5.05212400 | 1.95970400  | 1.97014200  |

---

---

|    |   |             |             |            |
|----|---|-------------|-------------|------------|
| Si | 0 | -5.05532500 | -1.94625100 | 1.94188800 |
| Si | 0 | -5.07040900 | -5.72591500 | 2.01678800 |
| Si | 0 | -2.59126500 | 5.75852200  | 1.95502200 |
| Si | 0 | -2.59579800 | 1.93308300  | 1.97397000 |
| Si | 0 | -2.59118400 | -1.96233500 | 1.99188000 |
| Si | 0 | -2.56535900 | -5.71262100 | 1.92993800 |
| Si | 0 | 2.60917600  | 5.75537900  | 1.94509100 |
| Si | 0 | 2.60763700  | 1.92099300  | 1.93890600 |
| Si | 0 | 2.62305400  | -1.92116800 | 1.93872900 |
| Si | 0 | 2.52168000  | -5.75803500 | 1.97759500 |
| Si | 0 | 5.03329700  | 5.74030500  | 1.96502600 |
| Si | 0 | 5.03604300  | 1.93884400  | 1.93591600 |
| Si | 0 | 5.04864200  | -1.94635300 | 1.93453900 |
| Si | 0 | 5.02700800  | -5.75045800 | 2.01154900 |
| O  | 0 | -5.35177900 | 5.54658300  | 3.60978000 |
| O  | 0 | -5.60145600 | 2.27852100  | 3.52098500 |
| O  | 0 | -5.63005600 | -2.12929600 | 3.53855200 |
| O  | 0 | -5.62933800 | -5.40553100 | 3.56433000 |
| O  | 0 | -2.15683400 | 5.77009600  | 3.57362800 |
| O  | 0 | -2.16340100 | 2.01130900  | 3.58397300 |
| O  | 0 | -2.07148600 | -2.35092300 | 3.51181500 |
| O  | 0 | -1.74984300 | -5.39445500 | 3.51180200 |
| O  | 0 | 2.36753200  | 5.75293500  | 3.61110600 |
| O  | 0 | 2.19881700  | 1.92823500  | 3.56544300 |
| O  | 0 | 2.42046700  | -1.97398600 | 3.60829300 |
| O  | 0 | 1.66913800  | -5.84511600 | 3.43376100 |
| O  | 0 | 5.36955700  | 5.48646000  | 3.59676000 |
| O  | 0 | 5.35824200  | 2.04478600  | 3.58645900 |
| O  | 0 | 5.40394100  | -2.17685800 | 3.56216700 |
| O  | 0 | 5.57177100  | -5.64089600 | 3.58695400 |
| H  | 0 | -5.63383500 | 4.64766100  | 3.84105400 |
| H  | 0 | -5.23594100 | 1.69870700  | 4.20893800 |
| H  | 0 | -5.70428800 | -3.05465600 | 3.82990600 |
| H  | 0 | -5.13025500 | -5.72021100 | 4.32961400 |
| H  | 0 | -2.91816600 | 5.61965400  | 4.15288600 |
| H  | 0 | -1.22262900 | 2.07207600  | 3.78907000 |
| H  | 0 | -4.81644200 | -1.13706300 | 4.54507600 |
| H  | 0 | -0.83811800 | -5.74984000 | 3.56128600 |

---

---

|    |   |             |             |            |
|----|---|-------------|-------------|------------|
| H  | 0 | 1.46338200  | 5.68402700  | 3.94026800 |
| H  | 0 | 2.98050100  | 1.91957900  | 4.13744600 |
| H  | 0 | 1.53291200  | -1.97839900 | 3.99182300 |
| H  | 0 | 1.82902200  | -5.14233700 | 4.07936900 |
| H  | 0 | 4.61015300  | 5.70461900  | 4.15881300 |
| H  | 0 | 5.67523700  | 2.91479900  | 3.86875800 |
| H  | 0 | 4.68037100  | -1.89088800 | 4.14039000 |
| H  | 0 | 5.69664400  | -4.73226200 | 3.89568100 |
| Al | 0 | -1.87961900 | -3.74830600 | 4.50142300 |
| Cl | 0 | 0.04696600  | -3.76096800 | 5.43413400 |
| Cl | 0 | -3.57201200 | -4.16491800 | 5.72514600 |
| Cl | 0 | -4.03538700 | -0.14641200 | 4.97408300 |

**P1<sup>A-Al</sup>**

| <b>Atom</b> | <b>Fix/Relax</b> | <b>X</b>    | <b>Y</b>    | <b>Z</b>    |
|-------------|------------------|-------------|-------------|-------------|
| Si          | -1               | -3.84010000 | 5.76010000  | -1.97260000 |
| Si          | -1               | -3.84010000 | 1.91999900  | -1.97260000 |
| Si          | -1               | -3.84009700 | -1.92000200 | -1.97259800 |
| Si          | -1               | -3.84009900 | -5.76009900 | -1.97260100 |
| Si          | -1               | 0.00000000  | 5.76010000  | -1.97260000 |
| Si          | -1               | 0.00000000  | 1.91999900  | -1.97260100 |
| Si          | -1               | 0.00000000  | -1.92000200 | -1.97260100 |
| Si          | -1               | -0.00000300 | -5.76009900 | -1.97259700 |
| Si          | -1               | 3.84010000  | 5.76010000  | -1.97260000 |
| Si          | -1               | 3.84010000  | 1.92000000  | -1.97260000 |
| Si          | -1               | 3.84009900  | -1.92000200 | -1.97260200 |
| Si          | -1               | 3.84010200  | -5.76010100 | -1.97259600 |
| Si          | -1               | -3.84010000 | 7.68019900  | -0.61490000 |
| Si          | -1               | -3.84010000 | 3.84009900  | -0.61490000 |
| Si          | -1               | -3.84010100 | 0.00000200  | -0.61490600 |
| Si          | -1               | -3.84010900 | -3.84009100 | -0.61489400 |
| Si          | -1               | -3.84009800 | -7.68020100 | -0.61490000 |
| Si          | -1               | 0.00000000  | 7.68019900  | -0.61490000 |
| Si          | -1               | 0.00000100  | 3.84009800  | -0.61490000 |
| Si          | -1               | -0.00000300 | 0.00000200  | -0.61490300 |
| Si          | -1               | 0.00000400  | -3.84010200 | -0.61490600 |
| Si          | -1               | 0.00000500  | -7.68019200 | -0.61490200 |
| Si          | -1               | 3.84010000  | 7.68020000  | -0.61490000 |

---

---

|    |    |             |             |             |
|----|----|-------------|-------------|-------------|
| Si | -1 | 3.84010000  | 3.84009900  | -0.61490000 |
| Si | -1 | 3.84009900  | -0.00000200 | -0.61490000 |
| Si | -1 | 3.84009800  | -3.84010200 | -0.61490700 |
| Si | -1 | 3.84009600  | -7.68019600 | -0.61490200 |
| Si | -1 | -5.76009900 | 7.68019900  | 0.74280100  |
| Si | -1 | -5.76010200 | 3.84010300  | 0.74279800  |
| Si | -1 | -5.76007900 | 0.00000800  | 0.74278600  |
| Si | -1 | -5.76014000 | -3.84014300 | 0.74281100  |
| Si | -1 | -5.76009200 | -7.68016300 | 0.74277900  |
| Si | -1 | -1.92000000 | 7.68019900  | 0.74280000  |
| Si | -1 | -1.92000300 | 3.84010300  | 0.74279700  |
| Si | -1 | -1.92000300 | 0.00002800  | 0.74281000  |
| Si | -1 | -1.91998800 | -3.84010400 | 0.74280200  |
| Si | -1 | -1.91997900 | -7.68024600 | 0.74280400  |
| Si | -1 | 1.92000000  | 7.68019900  | 0.74280000  |
| Si | -1 | 1.92000000  | 3.84009800  | 0.74279900  |
| Si | -1 | 1.91999600  | 0.00000400  | 0.74279900  |
| Si | -1 | 1.92001600  | -3.84004900 | 0.74281200  |
| Si | -1 | 1.91997800  | -7.68026100 | 0.74280900  |
| Si | -1 | 5.76009900  | 7.68019900  | 0.74280000  |
| Si | -1 | 5.76010000  | 3.84009900  | 0.74280000  |
| Si | -1 | 5.76010200  | 0.00000100  | 0.74279900  |
| Si | -1 | 5.76010600  | -3.84008600 | 0.74279800  |
| Si | -1 | 5.76008700  | -7.68020900 | 0.74280400  |
| H  | -1 | -2.97390000 | 5.79380000  | -3.16220000 |
| H  | -1 | -5.23870000 | 5.77270000  | -2.51530000 |
| H  | -1 | -2.98160000 | 1.92030000  | -3.17130000 |
| H  | -1 | -5.23930000 | 1.92050000  | -2.51900000 |
| H  | -1 | -2.98150000 | -1.92030000 | -3.17120000 |
| H  | -1 | -5.23930000 | -1.92050000 | -2.51900000 |
| H  | -1 | -2.97400000 | -5.79360000 | -3.16220000 |
| H  | -1 | -5.23870000 | -5.77270000 | -2.51530000 |
| H  | -1 | 1.16760000  | 5.71010000  | -2.86270000 |
| H  | -1 | -1.16750000 | 5.71010000  | -2.86280000 |
| H  | -1 | 1.17310000  | 1.91760000  | -2.85730000 |
| H  | -1 | -1.17330000 | 1.91760000  | -2.85710000 |
| H  | -1 | 1.17330000  | -1.91760000 | -2.85710000 |
| H  | -1 | -1.17310000 | -1.91760000 | -2.85730000 |

---

---

|    |    |             |             |             |
|----|----|-------------|-------------|-------------|
| H  | -1 | 1.16750000  | -5.71010000 | -2.86280000 |
| H  | -1 | -1.16760000 | -5.71010000 | -2.86270000 |
| H  | -1 | 5.23870000  | 5.77270000  | -2.51530000 |
| H  | -1 | 2.97400000  | 5.79360000  | -3.16220000 |
| H  | -1 | 5.23930000  | 1.92050000  | -2.51900000 |
| H  | -1 | 2.98150000  | 1.92030000  | -3.17120000 |
| H  | -1 | 5.23930000  | -1.92050000 | -2.51900000 |
| H  | -1 | 2.98160000  | -1.92030000 | -3.17130000 |
| H  | -1 | 5.23870000  | -5.77270000 | -2.51530000 |
| H  | -1 | 2.97390000  | -5.79380000 | -3.16220000 |
| H  | -1 | -3.82400000 | 8.85870000  | -1.53420000 |
| H  | -1 | -3.82399700 | -8.85870100 | -1.53419800 |
| H  | -1 | 0.00000000  | 8.92610000  | -1.42910000 |
| H  | -1 | -0.00000100 | -8.92609300 | -1.42911000 |
| H  | -1 | 3.82400000  | 8.85870000  | -1.53420000 |
| H  | -1 | 3.82400000  | -8.85869700 | -1.53420300 |
| H  | -1 | -7.00580000 | 7.40190000  | -0.01410000 |
| H  | -1 | -5.87799900 | 8.93300000  | 1.52980000  |
| H  | -1 | -7.05960100 | 3.84789900  | 0.03190200  |
| H  | -1 | -7.05809800 | -0.00000100 | 0.02889600  |
| H  | -1 | -7.05950500 | -3.84758900 | 0.03180800  |
| H  | -1 | -5.87619900 | -8.93249800 | 1.53080300  |
| H  | -1 | -7.00650400 | -7.40340700 | -0.01329600 |
| H  | -1 | -1.90149900 | 8.88670000  | 1.61890100  |
| H  | -1 | -1.90150300 | -8.88669900 | 1.61880100  |
| H  | -1 | 1.90150000  | 8.88670000  | 1.61880000  |
| H  | -1 | 1.90150600  | -8.88670000 | 1.61890000  |
| H  | -1 | 5.87620000  | 8.93250000  | 1.53080000  |
| H  | -1 | 7.00650000  | 7.40340000  | -0.01330000 |
| H  | -1 | 7.05950000  | 3.84759900  | 0.03180000  |
| H  | -1 | 7.05809900  | -0.00000100 | 0.02889900  |
| H  | -1 | 7.05960100  | -3.84790100 | 0.03190200  |
| H  | -1 | 7.00579800  | -7.40189900 | -0.01410300 |
| H  | -1 | 5.87801000  | -8.93299800 | 1.52980200  |
| Si | 0  | -5.02400300 | 5.74389000  | 1.96634500  |
| Si | 0  | -5.05440800 | 1.94515100  | 1.93912500  |
| Si | 0  | -5.05566700 | -1.90782700 | 1.96434900  |
| Si | 0  | -5.09982700 | -5.77335800 | 2.01692800  |

---

---

|    |   |             |             |            |
|----|---|-------------|-------------|------------|
| Si | 0 | -2.59443400 | 5.75731600  | 1.95434200 |
| Si | 0 | -2.62925700 | 1.92140900  | 1.93731900 |
| Si | 0 | -2.59300500 | -1.95594300 | 1.97354000 |
| Si | 0 | -2.59533900 | -5.71185500 | 1.92498100 |
| Si | 0 | 2.60978300  | 5.75510600  | 1.94455000 |
| Si | 0 | 2.61132100  | 1.91893400  | 1.93936900 |
| Si | 0 | 2.62258900  | -1.92274400 | 1.93704100 |
| Si | 0 | 2.52785200  | -5.75613700 | 1.97800000 |
| Si | 0 | 5.03391700  | 5.74048100  | 1.96502200 |
| Si | 0 | 5.03693400  | 1.93917100  | 1.93223500 |
| Si | 0 | 5.04855100  | -1.94671800 | 1.93523000 |
| Si | 0 | 5.02849900  | -5.75022800 | 2.01024900 |
| O  | 0 | -5.34230500 | 5.57664100  | 3.61248500 |
| O  | 0 | -5.43364600 | 2.19397600  | 3.55852300 |
| O  | 0 | -5.57194400 | -1.77873200 | 3.54584400 |
| O  | 0 | -5.66164500 | -5.92484500 | 3.56873500 |
| O  | 0 | -2.17843200 | 5.74663900  | 3.57882000 |
| O  | 0 | -2.39385300 | 1.89779100  | 3.60201500 |
| O  | 0 | -2.04645500 | -2.27939400 | 3.50946900 |
| O  | 0 | -1.78787400 | -5.36236300 | 3.51703500 |
| O  | 0 | 2.36703500  | 5.75089400  | 3.61087100 |
| O  | 0 | 2.23114800  | 1.91322000  | 3.57296000 |
| O  | 0 | 2.40712000  | -1.98017900 | 3.60723300 |
| O  | 0 | 1.69851400  | -5.82412500 | 3.44857300 |
| O  | 0 | 5.37107000  | 5.48758900  | 3.59667600 |
| O  | 0 | 5.34935900  | 2.05191600  | 3.58550300 |
| O  | 0 | 5.40618700  | -2.17492800 | 3.56310800 |
| O  | 0 | 5.56894800  | -5.63699300 | 3.58752100 |
| H  | 0 | -5.63639700 | 4.68851900  | 3.86311900 |
| H  | 0 | -4.78194000 | 1.80753500  | 4.16157300 |
| H  | 0 | -5.08787100 | -2.28485600 | 4.21338500 |
| H  | 0 | -5.34153500 | -5.30873900 | 4.24160400 |
| H  | 0 | -2.96011600 | 5.67360400  | 4.14643700 |
| H  | 0 | -1.48936000 | 1.90069200  | 3.93661100 |
| H  | 0 | -0.88921600 | -5.73983600 | 3.59828500 |
| H  | 0 | 1.46279800  | 5.67520000  | 3.93803700 |
| H  | 0 | 3.02864300  | 1.94865900  | 4.12272700 |
| H  | 0 | 1.51604300  | -1.92988700 | 3.97704800 |

---



---

|    |   |             |             |            |
|----|---|-------------|-------------|------------|
| H  | 0 | 1.90510700  | -5.13537600 | 4.09485700 |
| H  | 0 | 4.61186300  | 5.70488500  | 4.15921500 |
| H  | 0 | 5.68598000  | 2.91596200  | 3.86323500 |
| H  | 0 | 4.68857400  | -1.87952600 | 4.14353800 |
| H  | 0 | 5.70269200  | -4.72792100 | 3.89099700 |
| Al | 0 | -1.92885100 | -3.71445400 | 4.46499100 |
| Cl | 0 | -0.11252500 | -3.78290100 | 5.57433400 |
| Cl | 0 | -3.79001400 | -3.99917200 | 5.50494900 |

**Im1<sup>B-OiPr</sup>**

| <b>Atom</b> | <b>Fix/Relax</b> | <b>X</b>    | <b>Y</b>    | <b>Z</b>    |
|-------------|------------------|-------------|-------------|-------------|
| Si          | -1               | -3.84010000 | 5.76010000  | -1.97260000 |
| Si          | -1               | -3.84010000 | 1.92000000  | -1.97260000 |
| Si          | -1               | -3.84010000 | -1.92000000 | -1.97260000 |
| Si          | -1               | -3.84010000 | -5.76010000 | -1.97260000 |
| Si          | -1               | 0.00000000  | 5.76010000  | -1.97260000 |
| Si          | -1               | 0.00000000  | 1.92000000  | -1.97260000 |
| Si          | -1               | 0.00000000  | -1.92000000 | -1.97260000 |
| Si          | -1               | 0.00000000  | -5.76010000 | -1.97260000 |
| Si          | -1               | 3.84010000  | 5.76010000  | -1.97260000 |
| Si          | -1               | 3.84010000  | 1.92000000  | -1.97260000 |
| Si          | -1               | 3.84010000  | -1.92000000 | -1.97260000 |
| Si          | -1               | 3.84010000  | -5.76010000 | -1.97260000 |
| Si          | -1               | -3.84010000 | 7.68020000  | -0.61490000 |
| Si          | -1               | -3.84010000 | 3.84010000  | -0.61490000 |
| Si          | -1               | -3.84010000 | 0.00000000  | -0.61490000 |
| Si          | -1               | -3.84010000 | -3.84010000 | -0.61490000 |
| Si          | -1               | -3.84010000 | -7.68020000 | -0.61490000 |
| Si          | -1               | -0.00000100 | 7.68020000  | -0.61490000 |
| Si          | -1               | 0.00000000  | 3.84010000  | -0.61490000 |
| Si          | -1               | 0.00000000  | 0.00000000  | -0.61490000 |
| Si          | -1               | 0.00000000  | -3.84010000 | -0.61490100 |
| Si          | -1               | 0.00000000  | -7.68020000 | -0.61490000 |
| Si          | -1               | 3.84010000  | 7.68020000  | -0.61490000 |
| Si          | -1               | 3.84010100  | 3.84009900  | -0.61490000 |
| Si          | -1               | 3.84010100  | 0.00000000  | -0.61490000 |
| Si          | -1               | 3.84010000  | -3.84010100 | -0.61490000 |
| Si          | -1               | 3.84010000  | -7.68020000 | -0.61490000 |

---

---

|    |    |             |             |             |
|----|----|-------------|-------------|-------------|
| Si | -1 | -5.76010000 | 7.68019900  | 0.74280000  |
| Si | -1 | -5.76009700 | 3.84020000  | 0.74279900  |
| Si | -1 | -5.76010300 | 0.00000000  | 0.74289900  |
| Si | -1 | -5.76009900 | -3.84020100 | 0.74270100  |
| Si | -1 | -5.76010000 | -7.68020000 | 0.74280000  |
| Si | -1 | -1.92000000 | 7.68020000  | 0.74280100  |
| Si | -1 | -1.91989700 | 3.84009800  | 0.74280100  |
| Si | -1 | -1.92010100 | -0.00000100 | 0.74290000  |
| Si | -1 | -1.91999900 | -3.84009900 | 0.74280100  |
| Si | -1 | -1.92000000 | -7.68020000 | 0.74280000  |
| Si | -1 | 1.92000200  | 7.68019800  | 0.74280000  |
| Si | -1 | 1.92000000  | 3.84010100  | 0.74280000  |
| Si | -1 | 1.92000100  | 0.00000300  | 0.74279800  |
| Si | -1 | 1.92000100  | -3.84009900 | 0.74279900  |
| Si | -1 | 1.92000000  | -7.68020000 | 0.74280000  |
| Si | -1 | 5.76010000  | 7.68019900  | 0.74280100  |
| Si | -1 | 5.76009700  | 3.84010000  | 0.74279900  |
| Si | -1 | 5.76009800  | 0.00000200  | 0.74280000  |
| Si | -1 | 5.76010000  | -3.84010000 | 0.74280000  |
| Si | -1 | 5.76010000  | -7.68020000 | 0.74280000  |
| H  | -1 | -2.97390000 | 5.79380000  | -3.16220000 |
| H  | -1 | -5.23870000 | 5.77270000  | -2.51530000 |
| H  | -1 | -2.98160000 | 1.92030000  | -3.17130000 |
| H  | -1 | -5.23930000 | 1.92050000  | -2.51900000 |
| H  | -1 | -2.98150000 | -1.92030000 | -3.17120000 |
| H  | -1 | -5.23930000 | -1.92050000 | -2.51900000 |
| H  | -1 | -2.97400000 | -5.79360000 | -3.16220000 |
| H  | -1 | -5.23870000 | -5.77270000 | -2.51530000 |
| H  | -1 | 1.16760000  | 5.71010000  | -2.86270000 |
| H  | -1 | -1.16750000 | 5.71010000  | -2.86280000 |
| H  | -1 | 1.17310000  | 1.91760000  | -2.85730000 |
| H  | -1 | -1.17330000 | 1.91760000  | -2.85710000 |
| H  | -1 | 1.17330000  | -1.91760000 | -2.85710000 |
| H  | -1 | -1.17310000 | -1.91760000 | -2.85730000 |
| H  | -1 | 1.16750000  | -5.71010000 | -2.86280000 |
| H  | -1 | -1.16760000 | -5.71010000 | -2.86270000 |
| H  | -1 | 5.23870000  | 5.77270000  | -2.51530000 |
| H  | -1 | 2.97400000  | 5.79360000  | -3.16220000 |

---

---

|    |    |             |             |             |
|----|----|-------------|-------------|-------------|
| H  | -1 | 5.23930000  | 1.92050000  | -2.51900000 |
| H  | -1 | 2.98150000  | 1.92030000  | -3.17120000 |
| H  | -1 | 5.23930000  | -1.92050000 | -2.51900000 |
| H  | -1 | 2.98160000  | -1.92030000 | -3.17130000 |
| H  | -1 | 5.23870000  | -5.77270000 | -2.51530000 |
| H  | -1 | 2.97390000  | -5.79380000 | -3.16220000 |
| H  | -1 | -3.82400000 | 8.85870000  | -1.53420000 |
| H  | -1 | -3.82400000 | -8.85870000 | -1.53420000 |
| H  | -1 | 0.00000000  | 8.92610000  | -1.42910000 |
| H  | -1 | 0.00000000  | -8.92610000 | -1.42910000 |
| H  | -1 | 3.82400000  | 8.85870000  | -1.53420000 |
| H  | -1 | 3.82400000  | -8.85870000 | -1.53420000 |
| H  | -1 | -7.00580000 | 7.40190000  | -0.01410000 |
| H  | -1 | -5.87800000 | 8.93300000  | 1.52980000  |
| H  | -1 | -7.05960000 | 3.84790000  | 0.03190000  |
| H  | -1 | -7.05810000 | 0.00000000  | 0.02880000  |
| H  | -1 | -7.05950000 | -3.84760000 | 0.03180000  |
| H  | -1 | -5.87620000 | -8.93250000 | 1.53080000  |
| H  | -1 | -7.00650000 | -7.40340000 | -0.01330000 |
| H  | -1 | -1.90150000 | 8.88670000  | 1.61890000  |
| H  | -1 | -1.90150000 | -8.88670000 | 1.61880000  |
| H  | -1 | 1.90150000  | 8.88670000  | 1.61880000  |
| H  | -1 | 1.90150000  | -8.88670000 | 1.61890000  |
| H  | -1 | 5.87620000  | 8.93250000  | 1.53080000  |
| H  | -1 | 7.00650000  | 7.40340000  | -0.01330000 |
| H  | -1 | 7.05950100  | 3.84760000  | 0.03180100  |
| H  | -1 | 7.05810000  | 0.00000000  | 0.02890100  |
| H  | -1 | 7.05960000  | -3.84790000 | 0.03190000  |
| H  | -1 | 7.00580000  | -7.40190000 | -0.01410000 |
| H  | -1 | 5.87800000  | -8.93300000 | 1.52980000  |
| Si | 0  | -5.00520900 | 5.77779800  | 2.04529900  |
| Si | 0  | -5.07083700 | 1.89630900  | 1.89798000  |
| Si | 0  | -4.96292100 | -1.92830100 | 1.99883300  |
| Si | 0  | -5.04126900 | -5.75550300 | 1.94039400  |
| Si | 0  | -2.42858900 | 5.74752400  | 2.02930700  |
| Si | 0  | -2.62938800 | 1.91780100  | 1.89012600  |
| Si | 0  | -2.45504300 | -1.89775300 | 2.01972100  |
| Si | 0  | -2.60622300 | -5.74629300 | 1.93752900  |

---

---

|    |   |             |             |            |
|----|---|-------------|-------------|------------|
| Si | 0 | 2.38852100  | 5.76082700  | 1.94457800 |
| Si | 0 | 2.69203600  | 2.00791500  | 1.98036700 |
| Si | 0 | 2.37091500  | -1.92988900 | 1.97498200 |
| Si | 0 | 2.60779500  | -5.74237400 | 1.94035100 |
| Si | 0 | 4.83151600  | 5.64723600  | 1.98477200 |
| Si | 0 | 5.11363400  | 1.91342100  | 1.91118400 |
| Si | 0 | 4.91681900  | -1.94661500 | 2.00460600 |
| Si | 0 | 5.04260900  | -5.75244000 | 1.94011800 |
| O  | 0 | -5.63157200 | 5.86856200  | 3.58156500 |
| O  | 0 | -5.32936800 | 1.73488300  | 3.53507700 |
| O  | 0 | -5.30696900 | -2.02863900 | 3.64632200 |
| O  | 0 | -5.25455900 | -5.63377500 | 3.60865700 |
| O  | 0 | -1.45546700 | 5.68855100  | 3.39345900 |
| O  | 0 | -2.40299000 | 1.87287800  | 3.62962400 |
| O  | 0 | -1.67685000 | -1.71790200 | 3.47454200 |
| O  | 0 | -2.39701100 | -5.64519000 | 3.60365000 |
| O  | 0 | 1.64598000  | 5.81877100  | 3.42599800 |
| O  | 0 | 1.38320000  | -1.93775200 | 3.28351800 |
| O  | 0 | 2.40535500  | -5.62074000 | 3.60370800 |
| O  | 0 | 5.23296800  | -2.08872400 | 3.64928300 |
| O  | 0 | 5.25721600  | -5.60385600 | 3.60392000 |
| H  | 0 | -5.37326900 | 5.19836200  | 4.22941400 |
| H  | 0 | -6.22067500 | -2.21218100 | 3.89264500 |
| Al | 0 | -4.00320200 | 1.90473900  | 4.60825000 |
| Al | 0 | -3.82103700 | -5.43209500 | 4.53599500 |
| Cl | 0 | -4.36615000 | 3.60930800  | 5.83171300 |
| Cl | 0 | -3.87527800 | -5.08986200 | 6.57930500 |
| Al | 0 | -0.07841400 | -1.81012200 | 4.21211300 |
| Al | 0 | 0.06635900  | 6.14941300  | 4.05255000 |
| Cl | 0 | -0.01960400 | -3.23488800 | 5.79556800 |
| Cl | 0 | -0.00862200 | 7.90267200  | 5.22385000 |
| Al | 0 | 3.82753800  | -5.32357200 | 4.52032800 |
| Cl | 0 | 3.87661100  | -4.83416900 | 6.53078900 |
| H  | 0 | 6.14232400  | -2.24284900 | 3.92911200 |
| Al | 0 | -1.47278400 | 1.05259400  | 5.00005300 |
| O  | 0 | -3.18304600 | 0.55827900  | 5.51488000 |
| O  | 0 | -0.96816200 | 2.30273100  | 6.05027700 |
| O  | 0 | -0.06383100 | -0.07720200 | 4.94963200 |

---

---

|    |   |             |             |            |
|----|---|-------------|-------------|------------|
| C  | 0 | -3.64851900 | -0.19891200 | 6.67084200 |
| C  | 0 | -2.83602400 | -1.47201300 | 6.73199500 |
| C  | 0 | -1.01908400 | 3.70301600  | 6.11641800 |
| C  | 0 | -1.31937800 | 4.12899500  | 7.54452800 |
| C  | 0 | 1.10630500  | 0.38207000  | 5.78302300 |
| C  | 0 | 0.80535300  | 0.07606000  | 7.23722000 |
| H  | 0 | -4.69611400 | -0.43614900 | 6.45701300 |
| C  | 0 | -3.53034500 | 0.65752800  | 7.91861400 |
| H  | 0 | -2.89015400 | -2.00575600 | 5.77960500 |
| H  | 0 | -3.20299900 | -2.12945500 | 7.52333700 |
| H  | 0 | -1.78544900 | -1.24691300 | 6.95073500 |
| H  | 0 | -1.79792500 | 4.09557500  | 5.44994100 |
| C  | 0 | 0.32088700  | 4.25413800  | 5.64178300 |
| H  | 0 | -2.27798700 | 3.71127700  | 7.85916200 |
| H  | 0 | -1.37411000 | 5.21910300  | 7.62703600 |
| H  | 0 | -0.53610000 | 3.75939200  | 8.21407700 |
| H  | 0 | 1.15616300  | 1.45776600  | 5.61407000 |
| C  | 0 | 2.41935000  | -0.22719800 | 5.33232900 |
| H  | 0 | 0.72674100  | -1.00352600 | 7.39423100 |
| H  | 0 | -0.11331200 | 0.57124800  | 7.56100600 |
| H  | 0 | 1.62243500  | 0.45877000  | 7.85554800 |
| H  | 0 | -3.83866100 | 0.07875100  | 8.79298200 |
| H  | 0 | -4.15510100 | 1.55201100  | 7.85538400 |
| H  | 0 | -2.49150100 | 0.97480700  | 8.05790600 |
| H  | 0 | 2.63150700  | 0.00000900  | 4.28647000 |
| H  | 0 | 2.46797600  | -1.30801000 | 5.48707400 |
| H  | 0 | 3.20046200  | 0.24001900  | 5.94162200 |
| H  | 0 | 0.53770100  | 3.97651600  | 4.59937200 |
| H  | 0 | 1.16369000  | 3.85658100  | 6.21801300 |
| H  | 0 | 0.37870800  | 5.34026000  | 5.86617500 |
| O  | 0 | 2.63609000  | 2.55989000  | 3.57435300 |
| O  | 0 | 4.82415700  | 4.94259200  | 3.67906200 |
| O  | 0 | 5.41320200  | 2.14498400  | 3.52895800 |
| Al | 0 | 4.17046400  | 3.13618200  | 4.24601000 |
| Cl | 0 | 4.04146800  | 3.54166100  | 6.32346400 |
| H  | 0 | 4.60390800  | 5.56798200  | 4.38883200 |

---

TS1<sup>B</sup>-OiPr

| <b>Atom</b> | <b>Fix/Relax</b> | <b>X</b>    | <b>Y</b>    | <b>Z</b>    |
|-------------|------------------|-------------|-------------|-------------|
| Si          | -1               | -3.84010000 | 5.76010000  | -1.97260000 |
| Si          | -1               | -3.84010000 | 1.92000000  | -1.97260000 |
| Si          | -1               | -3.84010000 | -1.92000000 | -1.97260000 |
| Si          | -1               | -3.84010000 | -5.76010000 | -1.97260000 |
| Si          | -1               | 0.00000000  | 5.76010000  | -1.97260000 |
| Si          | -1               | 0.00000000  | 1.92000000  | -1.97260000 |
| Si          | -1               | 0.00000000  | -1.92000000 | -1.97260000 |
| Si          | -1               | 0.00000000  | -5.76010000 | -1.97260000 |
| Si          | -1               | 3.84010000  | 5.76010000  | -1.97260000 |
| Si          | -1               | 3.84010000  | 1.92000000  | -1.97260000 |
| Si          | -1               | 3.84010000  | -1.92000000 | -1.97260000 |
| Si          | -1               | 3.84010000  | -5.76010000 | -1.97260000 |
| Si          | -1               | -3.84010000 | 7.68020000  | -0.61490000 |
| Si          | -1               | -3.84010000 | 3.84010000  | -0.61490000 |
| Si          | -1               | -3.84010000 | 0.00000000  | -0.61490000 |
| Si          | -1               | -3.84010000 | -3.84010000 | -0.61490000 |
| Si          | -1               | -3.84010000 | -7.68020000 | -0.61490000 |
| Si          | -1               | 0.00000000  | 7.68020000  | -0.61490000 |
| Si          | -1               | 0.00000000  | 3.84010000  | -0.61490000 |
| Si          | -1               | 0.00000000  | 0.00000000  | -0.61490000 |
| Si          | -1               | 0.00000000  | -3.84010000 | -0.61490000 |
| Si          | -1               | 0.00000000  | -7.68020000 | -0.61490000 |
| Si          | -1               | 3.84010000  | 7.68020000  | -0.61490000 |
| Si          | -1               | 3.84010000  | 3.84010000  | -0.61490000 |
| Si          | -1               | 3.84010000  | 0.00000000  | -0.61490000 |
| Si          | -1               | 3.84010000  | -3.84010000 | -0.61490000 |
| Si          | -1               | 3.84010000  | -7.68020000 | -0.61490000 |
| Si          | -1               | -5.76010000 | 7.68020000  | 0.74280000  |
| Si          | -1               | -5.76010000 | 3.84020000  | 0.74280000  |
| Si          | -1               | -5.76010000 | 0.00000000  | 0.74290000  |
| Si          | -1               | -5.76010000 | -3.84020000 | 0.74270000  |
| Si          | -1               | -5.76010000 | -7.68020000 | 0.74280000  |
| Si          | -1               | -1.92000000 | 7.68020000  | 0.74280000  |
| Si          | -1               | -1.91990000 | 3.84010000  | 0.74280000  |
| Si          | -1               | -1.92010000 | 0.00000000  | 0.74290000  |
| Si          | -1               | -1.92000000 | -3.84010000 | 0.74280000  |
| Si          | -1               | -1.92000000 | -7.68020000 | 0.74280000  |

---

|    |    |             |             |             |
|----|----|-------------|-------------|-------------|
| Si | -1 | 1.92000000  | 7.68020000  | 0.74280000  |
| Si | -1 | 1.92000000  | 3.84010000  | 0.74280000  |
| Si | -1 | 1.92000000  | 0.00000000  | 0.74280000  |
| Si | -1 | 1.92000000  | -3.84010000 | 0.74280000  |
| Si | -1 | 1.92000000  | -7.68020000 | 0.74280000  |
| Si | -1 | 5.76010000  | 7.68020000  | 0.74280000  |
| Si | -1 | 5.76010000  | 3.84010000  | 0.74280000  |
| Si | -1 | 5.76010000  | 0.00000000  | 0.74280000  |
| Si | -1 | 5.76010000  | -3.84010000 | 0.74280000  |
| Si | -1 | 5.76010000  | -7.68020000 | 0.74280000  |
| H  | -1 | -2.97390000 | 5.79380000  | -3.16220000 |
| H  | -1 | -5.23870000 | 5.77270000  | -2.51530000 |
| H  | -1 | -2.98160000 | 1.92030000  | -3.17130000 |
| H  | -1 | -5.23930000 | 1.92050000  | -2.51900000 |
| H  | -1 | -2.98150000 | -1.92030000 | -3.17120000 |
| H  | -1 | -5.23930000 | -1.92050000 | -2.51900000 |
| H  | -1 | -2.97400000 | -5.79360000 | -3.16220000 |
| H  | -1 | -5.23870000 | -5.77270000 | -2.51530000 |
| H  | -1 | 1.16760000  | 5.71010000  | -2.86270000 |
| H  | -1 | -1.16750000 | 5.71010000  | -2.86280000 |
| H  | -1 | 1.17310000  | 1.91760000  | -2.85730000 |
| H  | -1 | -1.17330000 | 1.91760000  | -2.85710000 |
| H  | -1 | 1.17330000  | -1.91760000 | -2.85710000 |
| H  | -1 | -1.17310000 | -1.91760000 | -2.85730000 |
| H  | -1 | 1.16750000  | -5.71010000 | -2.86280000 |
| H  | -1 | -1.16760000 | -5.71010000 | -2.86270000 |
| H  | -1 | 5.23870000  | 5.77270000  | -2.51530000 |
| H  | -1 | 2.97400000  | 5.79360000  | -3.16220000 |
| H  | -1 | 5.23930000  | 1.92050000  | -2.51900000 |
| H  | -1 | 2.98150000  | 1.92030000  | -3.17120000 |
| H  | -1 | 5.23930000  | -1.92050000 | -2.51900000 |
| H  | -1 | 2.98160000  | -1.92030000 | -3.17130000 |
| H  | -1 | 5.23870000  | -5.77270000 | -2.51530000 |
| H  | -1 | 2.97390000  | -5.79380000 | -3.16220000 |
| H  | -1 | -3.82400000 | 8.85870000  | -1.53420000 |
| H  | -1 | -3.82400000 | -8.85870000 | -1.53420000 |
| H  | -1 | 0.00000000  | 8.92610000  | -1.42910000 |
| H  | -1 | 0.00000000  | -8.92610000 | -1.42910000 |

---

---

|    |    |             |             |             |
|----|----|-------------|-------------|-------------|
| H  | -1 | 3.82400000  | 8.85870000  | -1.53420000 |
| H  | -1 | 3.82400000  | -8.85870000 | -1.53420000 |
| H  | -1 | -7.00580000 | 7.40190000  | -0.01410000 |
| H  | -1 | -5.87800000 | 8.93300000  | 1.52980000  |
| H  | -1 | -7.05960000 | 3.84790000  | 0.03190000  |
| H  | -1 | -7.05810000 | 0.00000000  | 0.02880000  |
| H  | -1 | -7.05950000 | -3.84760000 | 0.03180000  |
| H  | -1 | -5.87620000 | -8.93250000 | 1.53080000  |
| H  | -1 | -7.00650000 | -7.40340000 | -0.01330000 |
| H  | -1 | -1.90150000 | 8.88670000  | 1.61890000  |
| H  | -1 | -1.90150000 | -8.88670000 | 1.61880000  |
| H  | -1 | 1.90150000  | 8.88670000  | 1.61880000  |
| H  | -1 | 1.90150000  | -8.88670000 | 1.61890000  |
| H  | -1 | 5.87620000  | 8.93250000  | 1.53080000  |
| H  | -1 | 7.00650000  | 7.40340000  | -0.01330000 |
| H  | -1 | 7.05950000  | 3.84760000  | 0.03180000  |
| H  | -1 | 7.05810000  | 0.00000000  | 0.02890000  |
| H  | -1 | 7.05960000  | -3.84790000 | 0.03190000  |
| H  | -1 | 7.00580000  | -7.40190000 | -0.01410000 |
| H  | -1 | 5.87800000  | -8.93300000 | 1.52980000  |
| Si | 0  | -5.00093100 | 5.77275000  | 2.04655500  |
| Si | 0  | -5.07194800 | 1.90306500  | 1.90846100  |
| Si | 0  | -4.96631900 | -1.93362000 | 1.99075500  |
| Si | 0  | -5.03625500 | -5.75335700 | 1.93960200  |
| Si | 0  | -2.42384700 | 5.74569900  | 2.02794300  |
| Si | 0  | -2.64213500 | 1.94897800  | 1.87918000  |
| Si | 0  | -2.43307600 | -1.94630600 | 2.02445000  |
| Si | 0  | -2.59960800 | -5.74687600 | 1.93652300  |
| Si | 0  | 2.39173900  | 5.76389200  | 1.93923400  |
| Si | 0  | 2.68335400  | 2.00283200  | 1.99431800  |
| Si | 0  | 2.40209500  | -1.92596400 | 1.98752200  |
| Si | 0  | 2.60379100  | -5.74274000 | 1.94019700  |
| Si | 0  | 4.83597700  | 5.65784600  | 1.96870400  |
| Si | 0  | 5.11044900  | 1.91212900  | 1.90318500  |
| Si | 0  | 4.92783100  | -1.94196600 | 1.99284300  |
| Si | 0  | 5.04003300  | -5.75156000 | 1.94005600  |
| O  | 0  | -5.61338700 | 5.85184700  | 3.59080500  |
| O  | 0  | -5.30655600 | 1.81617000  | 3.55577700  |

---



---

|    |   |             |             |            |
|----|---|-------------|-------------|------------|
| O  | 0 | -5.39902400 | -2.03752200 | 3.61493100 |
| O  | 0 | -5.24715800 | -5.63451300 | 3.60880300 |
| O  | 0 | -1.44400100 | 5.70170700  | 3.39089500 |
| O  | 0 | -2.44163400 | 2.15836200  | 3.59632500 |
| O  | 0 | -1.59181900 | -2.08174300 | 3.43046300 |
| O  | 0 | -2.38716100 | -5.68453100 | 3.60339000 |
| O  | 0 | 1.66554900  | 5.83320900  | 3.42529400 |
| O  | 0 | 1.55644400  | -1.93974800 | 3.39996300 |
| O  | 0 | 2.40164500  | -5.61795700 | 3.60631800 |
| O  | 0 | 5.25044700  | -2.05240800 | 3.64687900 |
| O  | 0 | 5.25959600  | -5.58399400 | 3.60413400 |
| H  | 0 | -5.36019000 | 5.17514200  | 4.23359600 |
| H  | 0 | -6.31551200 | -2.26565900 | 3.80704600 |
| Al | 0 | -3.96915400 | 1.99031700  | 4.62546200 |
| Al | 0 | -3.80958800 | -5.46150300 | 4.53575000 |
| Cl | 0 | -4.34654900 | 3.55001900  | 6.02534000 |
| Cl | 0 | -3.84077600 | -5.19047600 | 6.58929700 |
| Al | 0 | 0.07667700  | 6.18425000  | 4.03059600 |
| Cl | 0 | 0.02164500  | 7.96848600  | 5.15560000 |
| Al | 0 | 3.82532500  | -5.29282200 | 4.50778600 |
| Cl | 0 | 3.87209000  | -4.71705500 | 6.49824000 |
| H  | 0 | 6.14796100  | -2.28747700 | 3.90968600 |
| O  | 0 | -0.67303400 | 2.25653600  | 5.97804900 |
| C  | 0 | -0.83623100 | 3.63918700  | 6.17392400 |
| C  | 0 | -1.03303500 | 3.95177700  | 7.64891100 |
| H  | 0 | -1.70366100 | 4.01945600  | 5.61517600 |
| C  | 0 | 0.40250300  | 4.32547300  | 5.61758000 |
| H  | 0 | -1.96975800 | 3.51962200  | 8.00598400 |
| H  | 0 | -1.07612400 | 5.03227700  | 7.81797800 |
| H  | 0 | -0.20493500 | 3.53651300  | 8.23337300 |
| H  | 0 | 0.53664500  | 4.07097200  | 4.55659700 |
| H  | 0 | 1.32531800  | 3.98636600  | 6.10069000 |
| H  | 0 | 0.37312700  | 5.40822900  | 5.86103900 |
| O  | 0 | 2.67551400  | 2.55850400  | 3.59922300 |
| O  | 0 | 4.82995700  | 4.96422800  | 3.68444000 |
| O  | 0 | 5.43204000  | 2.13989600  | 3.52383400 |
| Al | 0 | 4.21790500  | 3.18347200  | 4.21250300 |
| Cl | 0 | 4.13431700  | 3.48474300  | 6.32308700 |

---

---

|    |   |             |             |            |
|----|---|-------------|-------------|------------|
| H  | 0 | 4.58518900  | 5.60364500  | 4.37372300 |
| Al | 0 | -1.34962600 | 1.22556000  | 4.76170400 |
| O  | 0 | -3.02194400 | 0.66521900  | 5.42578500 |
| C  | 0 | -3.42417500 | -0.02153400 | 6.64962700 |
| C  | 0 | -3.54056800 | -1.50412800 | 6.36261400 |
| H  | 0 | -4.41034500 | 0.38957000  | 6.90525000 |
| C  | 0 | -2.44731700 | 0.30039600  | 7.76308400 |
| H  | 0 | -4.22298000 | -1.68347500 | 5.52900500 |
| H  | 0 | -3.91601000 | -2.01843500 | 7.25208500 |
| H  | 0 | -2.55956900 | -1.92054500 | 6.11671800 |
| H  | 0 | -2.79065900 | -0.16477300 | 8.69077900 |
| H  | 0 | -2.36100800 | 1.37824100  | 7.91121600 |
| H  | 0 | -1.45991200 | -0.11060000 | 7.52573800 |
| Al | 0 | -0.04348900 | -1.45420400 | 4.02634900 |
| O  | 0 | -0.19468400 | 0.28086900  | 3.95009700 |
| Cl | 0 | 0.19806900  | -1.91805200 | 6.15454000 |
| C  | 0 | 2.13776700  | 0.58117200  | 5.87703700 |
| C  | 0 | 1.77099400  | 0.79022900  | 7.26178100 |
| H  | 0 | 1.56771900  | 1.11292200  | 5.10885000 |
| C  | 0 | 3.25152500  | -0.22326900 | 5.44101100 |
| H  | 0 | 2.14803500  | 0.02300100  | 7.93743200 |
| H  | 0 | 0.71073100  | 1.02605000  | 7.37304500 |
| H  | 0 | 2.31567100  | 1.73774700  | 7.46798300 |
| H  | 0 | 2.75872800  | -1.07260400 | 4.90866100 |
| H  | 0 | 3.88311200  | -0.61208700 | 6.23818700 |
| H  | 0 | 3.82021400  | 0.27168100  | 4.64217200 |

**Im<sup>2</sup>B-OiPr**

| <b>Atom</b> | <b>Fix/Relax</b> | <b>X</b>    | <b>Y</b>    | <b>Z</b>    |
|-------------|------------------|-------------|-------------|-------------|
| Si          | -1               | -3.84010000 | 5.76010000  | -1.97260000 |
| Si          | -1               | -3.84010000 | 1.92000000  | -1.97260000 |
| Si          | -1               | -3.84010000 | -1.92000000 | -1.97260000 |
| Si          | -1               | -3.84010000 | -5.76010000 | -1.97260000 |
| Si          | -1               | 0.00000000  | 5.76010000  | -1.97260000 |
| Si          | -1               | 0.00000000  | 1.92000000  | -1.97259900 |
| Si          | -1               | 0.00000000  | -1.92000000 | -1.97259900 |
| Si          | -1               | 0.00000000  | -5.76010000 | -1.97260000 |
| Si          | -1               | 3.84010000  | 5.76010000  | -1.97260000 |

---

---

|    |    |             |             |             |
|----|----|-------------|-------------|-------------|
| Si | -1 | 3.84010000  | 1.92000000  | -1.97260000 |
| Si | -1 | 3.84010000  | -1.92000000 | -1.97260000 |
| Si | -1 | 3.84010000  | -5.76010000 | -1.97260000 |
| Si | -1 | -3.84010000 | 7.68020000  | -0.61490000 |
| Si | -1 | -3.84010100 | 3.84010000  | -0.61490000 |
| Si | -1 | -3.84010100 | 0.00000100  | -0.61490000 |
| Si | -1 | -3.84010000 | -3.84010000 | -0.61490000 |
| Si | -1 | -3.84010000 | -7.68020000 | -0.61490000 |
| Si | -1 | 0.00000000  | 7.68020000  | -0.61490000 |
| Si | -1 | -0.00000200 | 3.84010000  | -0.61490200 |
| Si | -1 | -0.00000200 | 0.00000100  | -0.61490100 |
| Si | -1 | -0.00000100 | -3.84010000 | -0.61489800 |
| Si | -1 | 0.00000000  | -7.68020000 | -0.61490000 |
| Si | -1 | 3.84010000  | 7.68020000  | -0.61490000 |
| Si | -1 | 3.84010000  | 3.84010000  | -0.61490000 |
| Si | -1 | 3.84010200  | 0.00000000  | -0.61490000 |
| Si | -1 | 3.84010200  | -3.84010100 | -0.61490000 |
| Si | -1 | 3.84010000  | -7.68020000 | -0.61490000 |
| Si | -1 | -5.76010000 | 7.68020000  | 0.74280000  |
| Si | -1 | -5.76009700 | 3.84019800  | 0.74280000  |
| Si | -1 | -5.76009600 | 0.00000100  | 0.74289900  |
| Si | -1 | -5.76010000 | -3.84020000 | 0.74269900  |
| Si | -1 | -5.76010000 | -7.68020000 | 0.74280000  |
| Si | -1 | -1.92000100 | 7.68020000  | 0.74280000  |
| Si | -1 | -1.91989600 | 3.84010000  | 0.74280300  |
| Si | -1 | -1.92009700 | -0.00000300 | 0.74290000  |
| Si | -1 | -1.92000100 | -3.84010000 | 0.74279800  |
| Si | -1 | -1.92000000 | -7.68020000 | 0.74280000  |
| Si | -1 | 1.92000000  | 7.68020000  | 0.74280000  |
| Si | -1 | 1.92010000  | 3.84010000  | 0.74280100  |
| Si | -1 | 1.92000000  | -0.00000200 | 0.74279500  |
| Si | -1 | 1.92000200  | -3.84010000 | 0.74279100  |
| Si | -1 | 1.91999900  | -7.68019900 | 0.74280400  |
| Si | -1 | 5.76010000  | 7.68020000  | 0.74280000  |
| Si | -1 | 5.76010000  | 3.84010100  | 0.74279900  |
| Si | -1 | 5.76009400  | -0.00000300 | 0.74279900  |
| Si | -1 | 5.76009100  | -3.84009300 | 0.74279500  |
| Si | -1 | 5.76010200  | -7.68019900 | 0.74280300  |

---

---

|   |    |             |             |             |
|---|----|-------------|-------------|-------------|
| H | -1 | -2.97390000 | 5.79380000  | -3.16220000 |
| H | -1 | -5.23870000 | 5.77270000  | -2.51530000 |
| H | -1 | -2.98160000 | 1.92030000  | -3.17130000 |
| H | -1 | -5.23930000 | 1.92050000  | -2.51900000 |
| H | -1 | -2.98150000 | -1.92030000 | -3.17120000 |
| H | -1 | -5.23930000 | -1.92050000 | -2.51900000 |
| H | -1 | -2.97400000 | -5.79360000 | -3.16220000 |
| H | -1 | -5.23870000 | -5.77270000 | -2.51530000 |
| H | -1 | 1.16760000  | 5.71010000  | -2.86270000 |
| H | -1 | -1.16750000 | 5.71010000  | -2.86280000 |
| H | -1 | 1.17310000  | 1.91760000  | -2.85730000 |
| H | -1 | -1.17330000 | 1.91760000  | -2.85710000 |
| H | -1 | 1.17330000  | -1.91760000 | -2.85710000 |
| H | -1 | -1.17310000 | -1.91760000 | -2.85730000 |
| H | -1 | 1.16750000  | -5.71010000 | -2.86280000 |
| H | -1 | -1.16760000 | -5.71010000 | -2.86270000 |
| H | -1 | 5.23870000  | 5.77270000  | -2.51530000 |
| H | -1 | 2.97400000  | 5.79360000  | -3.16220000 |
| H | -1 | 5.23930000  | 1.92050000  | -2.51900000 |
| H | -1 | 2.98150000  | 1.92030000  | -3.17120000 |
| H | -1 | 5.23930000  | -1.92050000 | -2.51900000 |
| H | -1 | 2.98160000  | -1.92030000 | -3.17130000 |
| H | -1 | 5.23870000  | -5.77270000 | -2.51530000 |
| H | -1 | 2.97390000  | -5.79380000 | -3.16220000 |
| H | -1 | -3.82400000 | 8.85870000  | -1.53420000 |
| H | -1 | -3.82400000 | -8.85870000 | -1.53420000 |
| H | -1 | 0.00000000  | 8.92610000  | -1.42910000 |
| H | -1 | 0.00000000  | -8.92610000 | -1.42910000 |
| H | -1 | 3.82400000  | 8.85870000  | -1.53420000 |
| H | -1 | 3.82400000  | -8.85870000 | -1.53420000 |
| H | -1 | -7.00580000 | 7.40190000  | -0.01410000 |
| H | -1 | -5.87800000 | 8.93300000  | 1.52980000  |
| H | -1 | -7.05960100 | 3.84790100  | 0.03190100  |
| H | -1 | -7.05810100 | 0.00000000  | 0.02880200  |
| H | -1 | -7.05950000 | -3.84760000 | 0.03180000  |
| H | -1 | -5.87620000 | -8.93250000 | 1.53080000  |
| H | -1 | -7.00650000 | -7.40340000 | -0.01330000 |
| H | -1 | -1.90150000 | 8.88670000  | 1.61890000  |

---

---

|    |    |             |             |             |
|----|----|-------------|-------------|-------------|
| H  | -1 | -1.90150000 | -8.88670000 | 1.61880000  |
| H  | -1 | 1.90150000  | 8.88670000  | 1.61880000  |
| H  | -1 | 1.90150100  | -8.88670000 | 1.61890000  |
| H  | -1 | 5.87620000  | 8.93250000  | 1.53080000  |
| H  | -1 | 7.00650000  | 7.40340000  | -0.01330000 |
| H  | -1 | 7.05950000  | 3.84760000  | 0.03180000  |
| H  | -1 | 7.05810200  | 0.00000100  | 0.02890400  |
| H  | -1 | 7.05960300  | -3.84790200 | 0.03190500  |
| H  | -1 | 7.00579900  | -7.40190000 | -0.01410100 |
| H  | -1 | 5.87799900  | -8.93300100 | 1.52979900  |
| Si | 0  | -4.99774500 | 5.77308200  | 2.04774200  |
| Si | 0  | -5.08487800 | 1.90654000  | 1.90234100  |
| Si | 0  | -4.97309300 | -1.93112700 | 1.99715500  |
| Si | 0  | -5.03961000 | -5.75564900 | 1.93861400  |
| Si | 0  | -2.42239400 | 5.74532200  | 2.02998500  |
| Si | 0  | -2.65749900 | 1.95724600  | 1.87638200  |
| Si | 0  | -2.43843200 | -1.94854000 | 2.02605100  |
| Si | 0  | -2.60214600 | -5.74727400 | 1.93625700  |
| Si | 0  | 2.38693100  | 5.76397700  | 1.94594600  |
| Si | 0  | 2.68880100  | 2.00556400  | 2.00210400  |
| Si | 0  | 2.42895200  | -1.92380400 | 1.97447900  |
| Si | 0  | 2.60793300  | -5.74091600 | 1.93928900  |
| Si | 0  | 4.83367700  | 5.65086800  | 1.98246900  |
| Si | 0  | 5.11481300  | 1.91403100  | 1.90794900  |
| Si | 0  | 4.94372500  | -1.94504800 | 1.99352400  |
| Si | 0  | 5.04505300  | -5.75319900 | 1.93810700  |
| O  | 0  | -5.61445200 | 5.85124800  | 3.59110700  |
| O  | 0  | -5.33989100 | 1.82795400  | 3.54658000  |
| O  | 0  | -5.39580600 | -2.02178000 | 3.62534800  |
| O  | 0  | -5.25504500 | -5.64972000 | 3.60975200  |
| O  | 0  | -1.45225600 | 5.69458000  | 3.39405500  |
| O  | 0  | -2.47914400 | 2.20913500  | 3.59157500  |
| O  | 0  | -1.56117600 | -2.07888300 | 3.43441800  |
| O  | 0  | -2.38995700 | -5.68313400 | 3.60601500  |
| O  | 0  | 1.64943700  | 5.83888200  | 3.42476300  |
| O  | 0  | 1.54899900  | -1.92372400 | 3.37910000  |
| O  | 0  | 2.40630900  | -5.60966400 | 3.60699700  |
| O  | 0  | 5.25440100  | -2.09989300 | 3.64179900  |

---

---

|    |   |             |             |            |
|----|---|-------------|-------------|------------|
| O  | 0 | 5.26865900  | -5.60481700 | 3.60371400 |
| H  | 0 | -5.35811300 | 5.18091700  | 4.23863200 |
| H  | 0 | -6.32271100 | -2.19161400 | 3.82774000 |
| Al | 0 | -4.00333800 | 1.99188500  | 4.61642600 |
| Al | 0 | -3.81802900 | -5.49087500 | 4.53543600 |
| Cl | 0 | -4.36467100 | 3.48909600  | 6.07846200 |
| Cl | 0 | -3.82903900 | -5.22990400 | 6.59273400 |
| Al | 0 | -0.02702200 | -1.33308800 | 3.83753200 |
| Al | 0 | 0.06888600  | 6.11178200  | 4.08154100 |
| Cl | 0 | 0.43953700  | -1.54292700 | 6.18093600 |
| Cl | 0 | -0.01368100 | 7.78520000  | 5.36558600 |
| Al | 0 | 3.83759200  | -5.31025900 | 4.50682800 |
| Cl | 0 | 3.85247100  | -4.78392800 | 6.51275200 |
| H  | 0 | 6.16498200  | -2.25316700 | 3.91863300 |
| Al | 0 | -1.39283200 | 1.27114100  | 4.74314500 |
| O  | 0 | -3.06155500 | 0.61093700  | 5.33608900 |
| O  | 0 | -0.82926100 | 2.23513400  | 6.04882500 |
| O  | 0 | -0.25679100 | 0.36413200  | 3.86138200 |
| C  | 0 | -3.48796900 | -0.11659600 | 6.52311300 |
| C  | 0 | -3.37178300 | -1.60360200 | 6.25742800 |
| C  | 0 | -0.81408500 | 3.62707000  | 6.22913000 |
| C  | 0 | -0.82573000 | 3.95186500  | 7.71404600 |
| C  | 0 | 1.78780800  | -0.18932200 | 6.25058300 |
| C  | 0 | 1.58726800  | 0.54254600  | 7.55570300 |
| H  | 0 | -4.54632900 | 0.14269900  | 6.66360000 |
| C  | 0 | -2.69734600 | 0.34501300  | 7.73222800 |
| H  | 0 | -3.93752200 | -1.87799900 | 5.36434900 |
| H  | 0 | -3.75940500 | -2.16180600 | 7.11408700 |
| H  | 0 | -2.32558300 | -1.88743300 | 6.11322200 |
| H  | 0 | -1.69766200 | 4.08868400  | 5.76203800 |
| C  | 0 | 0.42872900  | 4.17861200  | 5.54525100 |
| H  | 0 | -1.73146800 | 3.54939600  | 8.17307800 |
| H  | 0 | -0.80828700 | 5.03353700  | 7.87935100 |
| H  | 0 | 0.04656400  | 3.50479400  | 8.20187800 |
| H  | 0 | 1.52031600  | 0.43163200  | 5.39153400 |
| C  | 0 | 3.12506800  | -0.86807400 | 6.08803000 |
| H  | 0 | 1.73955500  | -0.12202400 | 8.41018700 |
| H  | 0 | 0.60183400  | 1.01017600  | 7.59982700 |

---

---

|    |   |             |             |            |
|----|---|-------------|-------------|------------|
| H  | 0 | 2.34264200  | 1.33620700  | 7.59596400 |
| H  | 0 | -3.07452900 | -0.15989600 | 8.62549100 |
| H  | 0 | -2.78208400 | 1.42517700  | 7.86709600 |
| H  | 0 | -1.63854300 | 0.09148000  | 7.61633300 |
| H  | 0 | 3.18164400  | -1.43867200 | 5.16014000 |
| H  | 0 | 3.34392300  | -1.52122600 | 6.93660100 |
| H  | 0 | 3.88527900  | -0.07855800 | 6.05160500 |
| H  | 0 | 0.41172000  | 3.97247400  | 4.46302400 |
| H  | 0 | 1.34360000  | 3.68501800  | 5.88907100 |
| H  | 0 | 0.58517300  | 5.23736500  | 5.83309400 |
| O  | 0 | 2.67857000  | 2.56225200  | 3.59284300 |
| O  | 0 | 4.83753600  | 4.95034800  | 3.68113200 |
| O  | 0 | 5.44942400  | 2.14480100  | 3.51926100 |
| Al | 0 | 4.21820900  | 3.14719500  | 4.24044300 |
| Cl | 0 | 4.15255600  | 3.51859900  | 6.33132800 |
| H  | 0 | 4.60962500  | 5.58070800  | 4.38414000 |

**P1<sup>B</sup>-OiPr**

| <b>Atom</b> | <b>Fix/Relax</b> | <b>X</b>    | <b>Y</b>    | <b>Z</b>    |
|-------------|------------------|-------------|-------------|-------------|
| Si          | -1               | -3.84010000 | 5.76010000  | -1.97260000 |
| Si          | -1               | -3.84010000 | 1.92000000  | -1.97260000 |
| Si          | -1               | -3.84010000 | -1.92000000 | -1.97260000 |
| Si          | -1               | -3.84010000 | -5.76010000 | -1.97260000 |
| Si          | -1               | 0.00000000  | 5.76010000  | -1.97260000 |
| Si          | -1               | 0.00000000  | 1.92000000  | -1.97260000 |
| Si          | -1               | 0.00000000  | -1.92000000 | -1.97260000 |
| Si          | -1               | 0.00000000  | -5.76010000 | -1.97260000 |
| Si          | -1               | 3.84010000  | 5.76010000  | -1.97260000 |
| Si          | -1               | 3.84010000  | 1.92000000  | -1.97260000 |
| Si          | -1               | 3.84010000  | -1.92000000 | -1.97260000 |
| Si          | -1               | 3.84010000  | -5.76010000 | -1.97260000 |
| Si          | -1               | -3.84010000 | 7.68020000  | -0.61490000 |
| Si          | -1               | -3.84010100 | 3.84009900  | -0.61489700 |
| Si          | -1               | -3.84010100 | -0.00000200 | -0.61490000 |
| Si          | -1               | -3.84010000 | -3.84010100 | -0.61490100 |
| Si          | -1               | -3.84010000 | -7.68020000 | -0.61490000 |
| Si          | -1               | 0.00000000  | 7.68020000  | -0.61490200 |
| Si          | -1               | 0.00000200  | 3.84010100  | -0.61489700 |

---

---

|    |    |             |             |             |
|----|----|-------------|-------------|-------------|
| Si | -1 | 0.00000000  | -0.00000200 | -0.61489900 |
| Si | -1 | 0.00000000  | -3.84010100 | -0.61490200 |
| Si | -1 | 0.00000000  | -7.68020000 | -0.61490000 |
| Si | -1 | 3.84010000  | 7.68020200  | -0.61490000 |
| Si | -1 | 3.84010000  | 3.84010300  | -0.61489900 |
| Si | -1 | 3.84010000  | -0.00000200 | -0.61489900 |
| Si | -1 | 3.84010000  | -3.84010100 | -0.61490100 |
| Si | -1 | 3.84010000  | -7.68020000 | -0.61490000 |
| Si | -1 | -5.76009900 | 7.68020100  | 0.74280200  |
| Si | -1 | -5.76009800 | 3.84019900  | 0.74279400  |
| Si | -1 | -5.76009600 | 0.00000000  | 0.74289900  |
| Si | -1 | -5.76010100 | -3.84020000 | 0.74270100  |
| Si | -1 | -5.76010100 | -7.68020000 | 0.74279900  |
| Si | -1 | -1.92000200 | 7.68019900  | 0.74280300  |
| Si | -1 | -1.91990100 | 3.84010200  | 0.74279000  |
| Si | -1 | -1.92010000 | 0.00000500  | 0.74290000  |
| Si | -1 | -1.91999900 | -3.84009800 | 0.74280400  |
| Si | -1 | -1.92000100 | -7.68020000 | 0.74279900  |
| Si | -1 | 1.92000300  | 7.68019700  | 0.74280400  |
| Si | -1 | 1.91999900  | 3.84009400  | 0.74279800  |
| Si | -1 | 1.91999900  | 0.00000500  | 0.74280000  |
| Si | -1 | 1.91999900  | -3.84009800 | 0.74280300  |
| Si | -1 | 1.92000000  | -7.68020000 | 0.74279900  |
| Si | -1 | 5.76010200  | 7.68020100  | 0.74280300  |
| Si | -1 | 5.76009600  | 3.84009600  | 0.74279300  |
| Si | -1 | 5.76010200  | 0.00000500  | 0.74279800  |
| Si | -1 | 5.76009900  | -3.84010100 | 0.74280100  |
| Si | -1 | 5.76010000  | -7.68020000 | 0.74280000  |
| H  | -1 | -2.97390000 | 5.79380000  | -3.16220000 |
| H  | -1 | -5.23870000 | 5.77270000  | -2.51530000 |
| H  | -1 | -2.98160000 | 1.92030000  | -3.17130000 |
| H  | -1 | -5.23930000 | 1.92050000  | -2.51900000 |
| H  | -1 | -2.98150000 | -1.92030000 | -3.17120000 |
| H  | -1 | -5.23930000 | -1.92050000 | -2.51900000 |
| H  | -1 | -2.97400000 | -5.79360000 | -3.16220000 |
| H  | -1 | -5.23870000 | -5.77270000 | -2.51530000 |
| H  | -1 | 1.16760000  | 5.71010000  | -2.86270000 |
| H  | -1 | -1.16750000 | 5.71010000  | -2.86280000 |

---



---

|   |    |             |             |             |
|---|----|-------------|-------------|-------------|
| H | -1 | 1.17310000  | 1.91760000  | -2.85730000 |
| H | -1 | -1.17330000 | 1.91760000  | -2.85710000 |
| H | -1 | 1.17330000  | -1.91760000 | -2.85710000 |
| H | -1 | -1.17310000 | -1.91760000 | -2.85730000 |
| H | -1 | 1.16750000  | -5.71010000 | -2.86280000 |
| H | -1 | -1.16760000 | -5.71010000 | -2.86270000 |
| H | -1 | 5.23870000  | 5.77270000  | -2.51530000 |
| H | -1 | 2.97400000  | 5.79360000  | -3.16220000 |
| H | -1 | 5.23930000  | 1.92050000  | -2.51900000 |
| H | -1 | 2.98150000  | 1.92030000  | -3.17120000 |
| H | -1 | 5.23930000  | -1.92050000 | -2.51900000 |
| H | -1 | 2.98160000  | -1.92030000 | -3.17130000 |
| H | -1 | 5.23870000  | -5.77270000 | -2.51530000 |
| H | -1 | 2.97390000  | -5.79380000 | -3.16220000 |
| H | -1 | -3.82400000 | 8.85870000  | -1.53420100 |
| H | -1 | -3.82400000 | -8.85870000 | -1.53420000 |
| H | -1 | 0.00000000  | 8.92610000  | -1.42910000 |
| H | -1 | 0.00000000  | -8.92610000 | -1.42910000 |
| H | -1 | 3.82400000  | 8.85869900  | -1.53420100 |
| H | -1 | 3.82400000  | -8.85870000 | -1.53420000 |
| H | -1 | -7.00580000 | 7.40190000  | -0.01410100 |
| H | -1 | -5.87800000 | 8.93300000  | 1.52980000  |
| H | -1 | -7.05960200 | 3.84790100  | 0.03190400  |
| H | -1 | -7.05810100 | 0.00000000  | 0.02880200  |
| H | -1 | -7.05950000 | -3.84760000 | 0.03179900  |
| H | -1 | -5.87620000 | -8.93250000 | 1.53080000  |
| H | -1 | -7.00650000 | -7.40340000 | -0.01330000 |
| H | -1 | -1.90149800 | 8.88670000  | 1.61890000  |
| H | -1 | -1.90150000 | -8.88670000 | 1.61880000  |
| H | -1 | 1.90149800  | 8.88670000  | 1.61879900  |
| H | -1 | 1.90150000  | -8.88670000 | 1.61890000  |
| H | -1 | 5.87619900  | 8.93250000  | 1.53079900  |
| H | -1 | 7.00649900  | 7.40340000  | -0.01330100 |
| H | -1 | 7.05950200  | 3.84760100  | 0.03180300  |
| H | -1 | 7.05810100  | -0.00000100 | 0.02890100  |
| H | -1 | 7.05960000  | -3.84790000 | 0.03189900  |
| H | -1 | 7.00580000  | -7.40190000 | -0.01410000 |
| H | -1 | 5.87800000  | -8.93300000 | 1.52980000  |

---

---

|    |   |             |             |            |
|----|---|-------------|-------------|------------|
| Si | 0 | -5.00207800 | 5.77923700  | 2.04722300 |
| Si | 0 | -5.08178400 | 1.90197800  | 1.90880800 |
| Si | 0 | -4.97349700 | -1.93634300 | 1.99511600 |
| Si | 0 | -5.04645800 | -5.75346200 | 1.93848900 |
| Si | 0 | -2.42414500 | 5.74563000  | 2.03481100 |
| Si | 0 | -2.64901500 | 1.95480200  | 1.90333700 |
| Si | 0 | -2.47281000 | -1.94663800 | 1.97940900 |
| Si | 0 | -2.60895000 | -5.74188100 | 1.94168200 |
| Si | 0 | 2.38937000  | 5.76227300  | 1.94876100 |
| Si | 0 | 2.70779300  | 2.02345300  | 2.00074000 |
| Si | 0 | 2.42943600  | -1.92798300 | 1.98578800 |
| Si | 0 | 2.60925500  | -5.74467200 | 1.93847600 |
| Si | 0 | 4.83964000  | 5.65679800  | 1.98024500 |
| Si | 0 | 5.12625400  | 1.91723300  | 1.91723200 |
| Si | 0 | 4.95385400  | -1.93951600 | 2.00093100 |
| Si | 0 | 5.04497700  | -5.75686700 | 1.93821300 |
| O  | 0 | -5.63562200 | 5.87707100  | 3.57930700 |
| O  | 0 | -5.34076400 | 1.77647000  | 3.54798000 |
| O  | 0 | -5.28950500 | -2.06146300 | 3.64534200 |
| O  | 0 | -5.27080700 | -5.60563100 | 3.60469100 |
| O  | 0 | -1.45583300 | 5.67873800  | 3.39801400 |
| O  | 0 | -2.46512700 | 2.13547600  | 3.62555600 |
| O  | 0 | -1.59151200 | -2.03263100 | 3.39387700 |
| O  | 0 | -2.40778800 | -5.61906400 | 3.61034900 |
| O  | 0 | 1.64238900  | 5.82348100  | 3.42239200 |
| O  | 0 | 1.48921300  | -1.92023000 | 3.37065000 |
| O  | 0 | 2.40416000  | -5.64663500 | 3.60665100 |
| O  | 0 | 5.28124400  | -2.05098000 | 3.64012400 |
| O  | 0 | 5.26441400  | -5.64896800 | 3.60543200 |
| H  | 0 | -5.36387500 | 5.22883500  | 4.24408200 |
| H  | 0 | -6.20306900 | -2.21780000 | 3.91048000 |
| Al | 0 | -4.02692100 | 2.01085300  | 4.63346200 |
| Al | 0 | -3.83954100 | -5.32205900 | 4.50946700 |
| Cl | 0 | -4.41527400 | 3.68304500  | 5.89243300 |
| Cl | 0 | -3.85769100 | -4.78082000 | 6.51280100 |
| Al | 0 | -0.06724100 | -1.27546000 | 3.71702600 |
| Al | 0 | 0.06471500  | 6.15169800  | 4.05971900 |
| Cl | 0 | -0.02693000 | 7.96306600  | 5.14122600 |

---

---

|                             |                  |             |             |             |
|-----------------------------|------------------|-------------|-------------|-------------|
| Al                          | 0                | 3.83536800  | -5.43911700 | 4.53395500  |
| Cl                          | 0                | 3.83880300  | -5.11499400 | 6.57891600  |
| H                           | 0                | 6.19925100  | -2.07920900 | 3.93101100  |
| Al                          | 0                | -1.42168500 | 1.34160400  | 4.93603100  |
| O                           | 0                | -3.10790900 | 0.69122700  | 5.47286700  |
| O                           | 0                | -0.99355400 | 2.46304800  | 6.15283500  |
| O                           | 0                | -0.23655600 | 0.26341500  | 4.37304400  |
| C                           | 0                | -3.38911400 | -0.11447700 | 6.64718000  |
| C                           | 0                | -2.34083600 | -1.21004700 | 6.71451500  |
| C                           | 0                | -0.98009200 | 3.86100300  | 6.24494700  |
| C                           | 0                | -1.18234000 | 4.27640600  | 7.69268400  |
| H                           | 0                | -4.37157600 | -0.56559300 | 6.47207200  |
| C                           | 0                | -3.40735900 | 0.76508500  | 7.88551900  |
| H                           | 0                | -2.32846600 | -1.78023900 | 5.78109000  |
| H                           | 0                | -2.56167600 | -1.89385500 | 7.53724000  |
| H                           | 0                | -1.34902600 | -0.77513100 | 6.89650700  |
| H                           | 0                | -1.78752600 | 4.29727500  | 5.63865400  |
| C                           | 0                | 0.34844900  | 4.36428600  | 5.69155700  |
| H                           | 0                | -2.14954500 | 3.90890700  | 8.04379500  |
| H                           | 0                | -1.16849300 | 5.36599700  | 7.79598600  |
| H                           | 0                | -0.39295200 | 3.84739900  | 8.31717000  |
| H                           | 0                | -3.59432300 | 0.15277700  | 8.77163100  |
| H                           | 0                | -4.18862900 | 1.52677700  | 7.82035300  |
| H                           | 0                | -2.44302300 | 1.27102500  | 7.99482100  |
| H                           | 0                | 0.48172400  | 4.07039600  | 4.63795600  |
| H                           | 0                | 1.21032400  | 3.91445100  | 6.19551900  |
| H                           | 0                | 0.47302200  | 5.44580800  | 5.90811700  |
| O                           | 0                | 2.69544800  | 2.62047000  | 3.56888700  |
| O                           | 0                | 4.87817100  | 4.97160900  | 3.66702400  |
| O                           | 0                | 5.45237900  | 2.15843700  | 3.52585500  |
| Al                          | 0                | 4.22845200  | 3.17112400  | 4.25406300  |
| Cl                          | 0                | 4.15294200  | 3.65566800  | 6.31436100  |
| H                           | 0                | 4.68180400  | 5.59595000  | 4.38467000  |
| <b>TS2<sup>B</sup>-OiPr</b> |                  |             |             |             |
| <b>Atom</b>                 | <b>Fix/Relax</b> | <b>X</b>    | <b>Y</b>    | <b>Z</b>    |
| Si                          | -1               | -3.84010000 | 5.76010000  | -1.97260000 |
| Si                          | -1               | -3.84010000 | 1.92000000  | -1.97260000 |

---

---

|    |    |             |             |             |
|----|----|-------------|-------------|-------------|
| Si | -1 | -3.84010000 | -1.92000000 | -1.97260000 |
| Si | -1 | -3.84010000 | -5.76010000 | -1.97260000 |
| Si | -1 | 0.00000000  | 5.76010000  | -1.97260000 |
| Si | -1 | 0.00000000  | 1.92000000  | -1.97260000 |
| Si | -1 | 0.00000000  | -1.92000000 | -1.97260000 |
| Si | -1 | 0.00000000  | -5.76010000 | -1.97260000 |
| Si | -1 | 3.84010000  | 5.76010000  | -1.97260000 |
| Si | -1 | 3.84010000  | 1.92000000  | -1.97260000 |
| Si | -1 | 3.84010000  | -1.92000000 | -1.97260000 |
| Si | -1 | 3.84010000  | -5.76010000 | -1.97260000 |
| Si | -1 | -3.84010000 | 7.68020000  | -0.61490000 |
| Si | -1 | -3.84010000 | 3.84010000  | -0.61490000 |
| Si | -1 | -3.84010000 | 0.00000000  | -0.61490000 |
| Si | -1 | -3.84010000 | -3.84010000 | -0.61490000 |
| Si | -1 | -3.84010000 | -7.68020000 | -0.61490000 |
| Si | -1 | 0.00000000  | 7.68020000  | -0.61490000 |
| Si | -1 | 0.00000000  | 3.84010000  | -0.61490000 |
| Si | -1 | 0.00000000  | 0.00000000  | -0.61490000 |
| Si | -1 | 0.00000000  | -3.84010000 | -0.61490000 |
| Si | -1 | 0.00000000  | -7.68020000 | -0.61490000 |
| Si | -1 | 3.84010000  | 7.68020000  | -0.61490000 |
| Si | -1 | 3.84010000  | 3.84010000  | -0.61490000 |
| Si | -1 | 3.84010000  | 0.00000000  | -0.61490000 |
| Si | -1 | 3.84010000  | -3.84010000 | -0.61490000 |
| Si | -1 | 3.84010000  | -7.68020000 | -0.61490000 |
| Si | -1 | -5.76010000 | 7.68020000  | 0.74280000  |
| Si | -1 | -5.76010000 | 3.84020000  | 0.74280000  |
| Si | -1 | -5.76010000 | 0.00000000  | 0.74290000  |
| Si | -1 | -5.76010000 | -3.84020000 | 0.74270000  |
| Si | -1 | -5.76010000 | -7.68020000 | 0.74280000  |
| Si | -1 | -1.92000000 | 7.68020000  | 0.74280000  |
| Si | -1 | -1.91990000 | 3.84010000  | 0.74280000  |
| Si | -1 | -1.92010000 | 0.00000000  | 0.74290000  |
| Si | -1 | -1.92000000 | -3.84010000 | 0.74280000  |
| Si | -1 | -1.92000000 | -7.68020000 | 0.74280000  |
| Si | -1 | 1.92000000  | 7.68020000  | 0.74280000  |
| Si | -1 | 1.92000000  | 3.84010000  | 0.74280000  |
| Si | -1 | 1.92000000  | 0.00000000  | 0.74280000  |

---

---

|    |    |             |             |             |
|----|----|-------------|-------------|-------------|
| Si | -1 | 1.92000000  | -3.84010000 | 0.74280000  |
| Si | -1 | 1.92000000  | -7.68020000 | 0.74280000  |
| Si | -1 | 5.76010000  | 7.68020000  | 0.74280000  |
| Si | -1 | 5.76010000  | 3.84010000  | 0.74280000  |
| Si | -1 | 5.76010000  | 0.00000000  | 0.74280000  |
| Si | -1 | 5.76010000  | -3.84010000 | 0.74280000  |
| Si | -1 | 5.76010000  | -7.68020000 | 0.74280000  |
| H  | -1 | -2.97390000 | 5.79380000  | -3.16220000 |
| H  | -1 | -5.23870000 | 5.77270000  | -2.51530000 |
| H  | -1 | -2.98160000 | 1.92030000  | -3.17130000 |
| H  | -1 | -5.23930000 | 1.92050000  | -2.51900000 |
| H  | -1 | -2.98150000 | -1.92030000 | -3.17120000 |
| H  | -1 | -5.23930000 | -1.92050000 | -2.51900000 |
| H  | -1 | -2.97400000 | -5.79360000 | -3.16220000 |
| H  | -1 | -5.23870000 | -5.77270000 | -2.51530000 |
| H  | -1 | 1.16760000  | 5.71010000  | -2.86270000 |
| H  | -1 | -1.16750000 | 5.71010000  | -2.86280000 |
| H  | -1 | 1.17310000  | 1.91760000  | -2.85730000 |
| H  | -1 | -1.17330000 | 1.91760000  | -2.85710000 |
| H  | -1 | 1.17330000  | -1.91760000 | -2.85710000 |
| H  | -1 | -1.17310000 | -1.91760000 | -2.85730000 |
| H  | -1 | 1.16750000  | -5.71010000 | -2.86280000 |
| H  | -1 | -1.16760000 | -5.71010000 | -2.86270000 |
| H  | -1 | 5.23870000  | 5.77270000  | -2.51530000 |
| H  | -1 | 2.97400000  | 5.79360000  | -3.16220000 |
| H  | -1 | 5.23930000  | 1.92050000  | -2.51900000 |
| H  | -1 | 2.98150000  | 1.92030000  | -3.17120000 |
| H  | -1 | 5.23930000  | -1.92050000 | -2.51900000 |
| H  | -1 | 2.98160000  | -1.92030000 | -3.17130000 |
| H  | -1 | 5.23870000  | -5.77270000 | -2.51530000 |
| H  | -1 | 2.97390000  | -5.79380000 | -3.16220000 |
| H  | -1 | -3.82400000 | 8.85870000  | -1.53420000 |
| H  | -1 | -3.82400000 | -8.85870000 | -1.53420000 |
| H  | -1 | 0.00000000  | 8.92610000  | -1.42910000 |
| H  | -1 | 0.00000000  | -8.92610000 | -1.42910000 |
| H  | -1 | 3.82400000  | 8.85870000  | -1.53420000 |
| H  | -1 | 3.82400000  | -8.85870000 | -1.53420000 |
| H  | -1 | -7.00580000 | 7.40190000  | -0.01410000 |

---

---

|    |    |             |             |             |
|----|----|-------------|-------------|-------------|
| H  | -1 | -5.87800000 | 8.93300000  | 1.52980000  |
| H  | -1 | -7.05960000 | 3.84790000  | 0.03190000  |
| H  | -1 | -7.05810000 | 0.00000000  | 0.02880000  |
| H  | -1 | -7.05950000 | -3.84760000 | 0.03180000  |
| H  | -1 | -5.87620000 | -8.93250000 | 1.53080000  |
| H  | -1 | -7.00650000 | -7.40340000 | -0.01330000 |
| H  | -1 | -1.90150000 | 8.88670000  | 1.61890000  |
| H  | -1 | -1.90150000 | -8.88670000 | 1.61880000  |
| H  | -1 | 1.90150000  | 8.88670000  | 1.61880000  |
| H  | -1 | 1.90150000  | -8.88670000 | 1.61890000  |
| H  | -1 | 5.87620000  | 8.93250000  | 1.53080000  |
| H  | -1 | 7.00650000  | 7.40340000  | -0.01330000 |
| H  | -1 | 7.05950000  | 3.84760000  | 0.03180000  |
| H  | -1 | 7.05810000  | 0.00000000  | 0.02890000  |
| H  | -1 | 7.05960000  | -3.84790000 | 0.03190000  |
| H  | -1 | 7.00580000  | -7.40190000 | -0.01410000 |
| H  | -1 | 5.87800000  | -8.93300000 | 1.52980000  |
| Si | 0  | -5.01121700 | 5.78115600  | 2.04294600  |
| Si | 0  | -5.06923000 | 1.90293700  | 1.90690500  |
| Si | 0  | -4.95573300 | -1.93688900 | 1.99183500  |
| Si | 0  | -5.03587800 | -5.75024100 | 1.94171000  |
| Si | 0  | -2.42886800 | 5.74636500  | 2.03191000  |
| Si | 0  | -2.62895900 | 1.93719000  | 1.89984200  |
| Si | 0  | -2.44937100 | -1.94719400 | 2.00554600  |
| Si | 0  | -2.59960800 | -5.74429200 | 1.93776400  |
| Si | 0  | 2.39064200  | 5.76112200  | 1.94081000  |
| Si | 0  | 2.69818600  | 2.00927900  | 1.98763700  |
| Si | 0  | 2.36643900  | -1.92392500 | 1.98948200  |
| Si | 0  | 2.60369600  | -5.74333300 | 1.94081100  |
| Si | 0  | 4.83707300  | 5.66015400  | 1.96983900  |
| Si | 0  | 5.12047400  | 1.91323000  | 1.90896500  |
| Si | 0  | 4.91367400  | -1.94320700 | 2.00017200  |
| Si | 0  | 5.03846600  | -5.75065300 | 1.94180900  |
| O  | 0  | -5.65301800 | 5.89805500  | 3.56965100  |
| O  | 0  | -5.31912800 | 1.81276300  | 3.55187300  |
| O  | 0  | -5.29403200 | -2.04804600 | 3.63965900  |
| O  | 0  | -5.24378100 | -5.59316500 | 3.60795700  |
| O  | 0  | -1.44966300 | 5.69238600  | 3.39607700  |

---

---

|    |   |             |             |            |
|----|---|-------------|-------------|------------|
| O  | 0 | -2.41282000 | 2.04399000  | 3.63371500 |
| O  | 0 | -1.66528400 | -2.07243800 | 3.43689700 |
| O  | 0 | -2.38788300 | -5.64636300 | 3.60169900 |
| O  | 0 | 1.65823000  | 5.81423300  | 3.42594800 |
| O  | 0 | 1.45928800  | -1.89402900 | 3.35335100 |
| O  | 0 | 2.40024000  | -5.61862400 | 3.60439900 |
| O  | 0 | 5.24661600  | -2.05687400 | 3.64959500 |
| O  | 0 | 5.25173000  | -5.58007300 | 3.60506300 |
| H  | 0 | -5.39851400 | 5.24268800  | 4.23404800 |
| H  | 0 | -6.19710700 | -2.27503800 | 3.88859300 |
| Al | 0 | -3.99437400 | 2.06561800  | 4.61559800 |
| Al | 0 | -3.80536800 | -5.34048200 | 4.51872600 |
| Cl | 0 | -4.36465600 | 3.79100400  | 5.81559000 |
| Cl | 0 | -3.85139800 | -4.89115700 | 6.54160500 |
| Al | 0 | -0.10498400 | -1.70692500 | 4.19364100 |
| Al | 0 | 0.07172200  | 6.20820000  | 4.01100600 |
| Cl | 0 | 0.20568200  | -2.86927900 | 5.99295200 |
| Cl | 0 | 0.02440200  | 8.07411400  | 4.99414400 |
| Al | 0 | 3.81833500  | -5.29058400 | 4.51467100 |
| Cl | 0 | 3.88717200  | -4.73927500 | 6.51056700 |
| H  | 0 | 6.14516300  | -2.29190000 | 3.90858000 |
| Al | 0 | -1.42064200 | 1.18631400  | 4.95549500 |
| O  | 0 | -3.14641700 | 0.79825500  | 5.57851800 |
| O  | 0 | -0.69035900 | 2.35424900  | 6.00837000 |
| O  | 0 | -0.26218000 | -0.02372500 | 4.67358600 |
| C  | 0 | -3.59077900 | 0.00950000  | 6.71551700 |
| C  | 0 | -2.77312900 | -1.26263300 | 6.74345300 |
| C  | 0 | -0.92837900 | 3.72959600  | 6.17126900 |
| C  | 0 | -1.28915100 | 4.04089300  | 7.61503900 |
| C  | 0 | 2.17674200  | 0.75234400  | 6.00661900 |
| C  | 0 | 1.38940600  | 0.40678900  | 7.11198200 |
| H  | 0 | -4.64246200 | -0.22688300 | 6.51861000 |
| C  | 0 | -3.45371500 | 0.83467500  | 7.98188800 |
| H  | 0 | -2.82798500 | -1.78221100 | 5.78251700 |
| H  | 0 | -3.13416400 | -1.93538500 | 7.52482400 |
| H  | 0 | -1.72196700 | -1.03900300 | 6.95717500 |
| H  | 0 | -1.74225900 | 4.07026200  | 5.51729200 |
| C  | 0 | 0.33589800  | 4.46268000  | 5.74105400 |

---

---

|    |   |             |             |            |
|----|---|-------------|-------------|------------|
| H  | 0 | -2.20224100 | 3.51170100  | 7.89433800 |
| H  | 0 | -1.45995400 | 5.11250700  | 7.75730100 |
| H  | 0 | -0.47884900 | 3.72190300  | 8.27977900 |
| H  | 0 | 1.89841700  | 1.64984000  | 5.44980600 |
| C  | 0 | 3.17266200  | -0.12887600 | 5.40311500 |
| H  | 0 | 1.68335400  | -0.44582100 | 7.71751500 |
| H  | 0 | 0.66920000  | 0.02608800  | 6.25417400 |
| H  | 0 | 0.79183000  | 1.19611400  | 7.56260600 |
| H  | 0 | -3.78095700 | 0.24963700  | 8.84528600 |
| H  | 0 | -4.05189500 | 1.74866100  | 7.93242600 |
| H  | 0 | -2.40388000 | 1.11215600  | 8.12694600 |
| H  | 0 | 2.62650300  | -0.64023000 | 4.58391500 |
| H  | 0 | 3.55586600  | -0.89457600 | 6.07742500 |
| H  | 0 | 3.97833800  | 0.43061300  | 4.91645000 |
| H  | 0 | 0.61206700  | 4.17464000  | 4.71613100 |
| H  | 0 | 1.20703500  | 4.19141300  | 6.34778900 |
| H  | 0 | 0.22644600  | 5.55203300  | 5.92870900 |
| O  | 0 | 2.68046500  | 2.58619800  | 3.58184800 |
| O  | 0 | 4.83681700  | 4.97897500  | 3.68984300 |
| O  | 0 | 5.43664500  | 2.15858600  | 3.52813300 |
| Al | 0 | 4.21936500  | 3.20111600  | 4.21526100 |
| Cl | 0 | 4.06907400  | 3.47875800  | 6.32261800 |
| H  | 0 | 4.58732400  | 5.62102500  | 4.37495500 |

**Im3<sup>B</sup>-O<sub>i</sub>Pr**

| <b>Atom</b> | <b>Fix/Relax</b> | <b>X</b>    | <b>Y</b>    | <b>Z</b>    |
|-------------|------------------|-------------|-------------|-------------|
| Si          | -1               | -3.84010000 | 5.76010000  | -1.97260000 |
| Si          | -1               | -3.84010000 | 1.92000000  | -1.97260000 |
| Si          | -1               | -3.84010000 | -1.92000000 | -1.97260000 |
| Si          | -1               | -3.84010000 | -5.76010000 | -1.97260000 |
| Si          | -1               | 0.00000000  | 5.76010000  | -1.97260000 |
| Si          | -1               | 0.00000000  | 1.92000000  | -1.97259900 |
| Si          | -1               | 0.00000000  | -1.92000000 | -1.97259900 |
| Si          | -1               | 0.00000000  | -5.76010000 | -1.97260000 |
| Si          | -1               | 3.84010000  | 5.76010000  | -1.97260000 |
| Si          | -1               | 3.84010000  | 1.91999900  | -1.97260000 |
| Si          | -1               | 3.84010000  | -1.92000000 | -1.97260000 |
| Si          | -1               | 3.84010000  | -5.76010000 | -1.97260000 |

---



---

|    |    |             |             |             |
|----|----|-------------|-------------|-------------|
| Si | -1 | -3.84010000 | 7.68020000  | -0.61490000 |
| Si | -1 | -3.84010100 | 3.84009900  | -0.61489900 |
| Si | -1 | -3.84010100 | -0.00000100 | -0.61490100 |
| Si | -1 | -3.84010000 | -3.84010100 | -0.61490100 |
| Si | -1 | -3.84010000 | -7.68020000 | -0.61490000 |
| Si | -1 | 0.00000000  | 7.68020000  | -0.61490000 |
| Si | -1 | 0.00000500  | 3.84010000  | -0.61490100 |
| Si | -1 | -0.00000300 | -0.00000200 | -0.61490100 |
| Si | -1 | -0.00000400 | -3.84010000 | -0.61490300 |
| Si | -1 | 0.00000000  | -7.68020000 | -0.61490000 |
| Si | -1 | 3.84010000  | 7.68020100  | -0.61490100 |
| Si | -1 | 3.84010100  | 3.84010300  | -0.61490200 |
| Si | -1 | 3.84010100  | 0.00000000  | -0.61489700 |
| Si | -1 | 3.84010100  | -3.84010100 | -0.61489800 |
| Si | -1 | 3.84010000  | -7.68020000 | -0.61490000 |
| Si | -1 | -5.76009900 | 7.68020000  | 0.74280000  |
| Si | -1 | -5.76009800 | 3.84019800  | 0.74279700  |
| Si | -1 | -5.76009500 | -0.00000100 | 0.74289900  |
| Si | -1 | -5.76010000 | -3.84020000 | 0.74270000  |
| Si | -1 | -5.76010000 | -7.68020100 | 0.74279900  |
| Si | -1 | -1.91999900 | 7.68020000  | 0.74280100  |
| Si | -1 | -1.91990400 | 3.84010300  | 0.74279200  |
| Si | -1 | -1.92009800 | 0.00000600  | 0.74290400  |
| Si | -1 | -1.91999500 | -3.84009900 | 0.74280900  |
| Si | -1 | -1.92000300 | -7.68020000 | 0.74279800  |
| Si | -1 | 1.92000000  | 7.68020200  | 0.74279800  |
| Si | -1 | 1.91999800  | 3.84009500  | 0.74281000  |
| Si | -1 | 1.92000000  | 0.00000100  | 0.74279000  |
| Si | -1 | 1.92000000  | -3.84009700 | 0.74279700  |
| Si | -1 | 1.92000000  | -7.68020000 | 0.74280200  |
| Si | -1 | 5.76010000  | 7.68019900  | 0.74280000  |
| Si | -1 | 5.76009500  | 3.84009700  | 0.74280600  |
| Si | -1 | 5.76010100  | -0.00000100 | 0.74279500  |
| Si | -1 | 5.76009800  | -3.84009900 | 0.74280000  |
| Si | -1 | 5.76010000  | -7.68020000 | 0.74280000  |
| H  | -1 | -2.97390000 | 5.79380000  | -3.16220000 |
| H  | -1 | -5.23870000 | 5.77270000  | -2.51530000 |
| H  | -1 | -2.98160000 | 1.92030000  | -3.17130000 |

---

---

|   |    |             |             |             |
|---|----|-------------|-------------|-------------|
| H | -1 | -5.23930000 | 1.92050000  | -2.51900000 |
| H | -1 | -2.98150000 | -1.92030000 | -3.17120000 |
| H | -1 | -5.23930000 | -1.92050000 | -2.51900000 |
| H | -1 | -2.97400000 | -5.79360000 | -3.16220000 |
| H | -1 | -5.23870000 | -5.77270000 | -2.51530000 |
| H | -1 | 1.16760000  | 5.71010000  | -2.86270000 |
| H | -1 | -1.16750000 | 5.71010000  | -2.86280000 |
| H | -1 | 1.17310000  | 1.91760000  | -2.85730000 |
| H | -1 | -1.17330000 | 1.91760000  | -2.85710000 |
| H | -1 | 1.17330000  | -1.91760000 | -2.85710000 |
| H | -1 | -1.17310000 | -1.91760000 | -2.85730000 |
| H | -1 | 1.16750000  | -5.71010000 | -2.86280000 |
| H | -1 | -1.16760000 | -5.71010000 | -2.86270000 |
| H | -1 | 5.23870000  | 5.77270000  | -2.51530000 |
| H | -1 | 2.97400000  | 5.79360000  | -3.16220000 |
| H | -1 | 5.23930000  | 1.92050000  | -2.51900000 |
| H | -1 | 2.98150000  | 1.92030000  | -3.17120000 |
| H | -1 | 5.23930000  | -1.92050000 | -2.51900000 |
| H | -1 | 2.98160000  | -1.92030000 | -3.17130000 |
| H | -1 | 5.23870000  | -5.77270000 | -2.51530000 |
| H | -1 | 2.97390000  | -5.79380000 | -3.16220000 |
| H | -1 | -3.82400000 | 8.85870000  | -1.53420000 |
| H | -1 | -3.82400000 | -8.85870000 | -1.53420000 |
| H | -1 | 0.00000000  | 8.92610000  | -1.42910000 |
| H | -1 | 0.00000000  | -8.92610000 | -1.42910000 |
| H | -1 | 3.82400000  | 8.85870000  | -1.53420000 |
| H | -1 | 3.82400000  | -8.85870000 | -1.53420000 |
| H | -1 | -7.00580000 | 7.40190000  | -0.01410000 |
| H | -1 | -5.87800000 | 8.93300000  | 1.52980000  |
| H | -1 | -7.05960200 | 3.84790100  | 0.03190300  |
| H | -1 | -7.05810100 | 0.00000100  | 0.02880200  |
| H | -1 | -7.05950000 | -3.84760000 | 0.03180000  |
| H | -1 | -5.87620000 | -8.93250000 | 1.53080000  |
| H | -1 | -7.00650000 | -7.40340000 | -0.01330000 |
| H | -1 | -1.90150000 | 8.88670000  | 1.61890000  |
| H | -1 | -1.90149900 | -8.88670000 | 1.61880000  |
| H | -1 | 1.90150000  | 8.88670000  | 1.61880000  |
| H | -1 | 1.90150100  | -8.88670000 | 1.61890000  |

---

---

|    |    |             |             |             |
|----|----|-------------|-------------|-------------|
| H  | -1 | 5.87620000  | 8.93250000  | 1.53080000  |
| H  | -1 | 7.00650000  | 7.40340100  | -0.01330000 |
| H  | -1 | 7.05949900  | 3.84760100  | 0.03179800  |
| H  | -1 | 7.05810100  | 0.00000000  | 0.02890300  |
| H  | -1 | 7.05960100  | -3.84790000 | 0.03190100  |
| H  | -1 | 7.00580000  | -7.40190000 | -0.01410000 |
| H  | -1 | 5.87800000  | -8.93300000 | 1.52980000  |
| Si | 0  | -5.00484000 | 5.78035400  | 2.04556500  |
| Si | 0  | -5.08110300 | 1.90227000  | 1.90202500  |
| Si | 0  | -4.97050000 | -1.93507900 | 1.98925800  |
| Si | 0  | -5.03803100 | -5.75247500 | 1.94245000  |
| Si | 0  | -2.42402100 | 5.74530300  | 2.03511100  |
| Si | 0  | -2.64053600 | 1.92814000  | 1.89207300  |
| Si | 0  | -2.47647700 | -1.93260100 | 1.98801500  |
| Si | 0  | -2.60284500 | -5.74422200 | 1.93831800  |
| Si | 0  | 2.39226000  | 5.76330800  | 1.94509900  |
| Si | 0  | 2.71439300  | 2.02541100  | 1.99845900  |
| Si | 0  | 2.37632800  | -1.92516900 | 1.99973900  |
| Si | 0  | 2.60625800  | -5.74321500 | 1.93897000  |
| Si | 0  | 4.84229500  | 5.66174300  | 1.97186800  |
| Si | 0  | 5.13203100  | 1.91516000  | 1.91438800  |
| Si | 0  | 4.92712400  | -1.94663800 | 2.00621000  |
| Si | 0  | 5.04075200  | -5.75257100 | 1.94007100  |
| O  | 0  | -5.64060300 | 5.88389400  | 3.57688400  |
| O  | 0  | -5.34827100 | 1.79100600  | 3.54487400  |
| O  | 0  | -5.30178700 | -2.04312100 | 3.63912200  |
| O  | 0  | -5.24741600 | -5.60429700 | 3.60923200  |
| O  | 0  | -1.44991200 | 5.67435600  | 3.39927700  |
| O  | 0  | -2.42994600 | 1.95157000  | 3.64123000  |
| O  | 0  | -1.70511400 | -1.95823500 | 3.44074300  |
| O  | 0  | -2.39024200 | -5.63513400 | 3.60279600  |
| O  | 0  | 1.64578900  | 5.83441900  | 3.42219300  |
| O  | 0  | 1.43972000  | -1.92624800 | 3.35311500  |
| O  | 0  | 2.40162100  | -5.62189400 | 3.60264300  |
| O  | 0  | 5.28630400  | -2.09467700 | 3.64159300  |
| O  | 0  | 5.25391100  | -5.60410900 | 3.60410500  |
| H  | 0  | -5.36466000 | 5.23710000  | 4.24057100  |
| H  | 0  | -6.20136800 | -2.28204900 | 3.88984700  |

---

---

|    |   |             |             |            |
|----|---|-------------|-------------|------------|
| Al | 0 | -4.02898300 | 2.00109600  | 4.61563500 |
| Al | 0 | -3.81116900 | -5.36631900 | 4.52617400 |
| Cl | 0 | -4.31478700 | 3.72422800  | 5.83010000 |
| Cl | 0 | -3.86693500 | -4.94151000 | 6.55401900 |
| Al | 0 | -0.10751200 | -1.89334800 | 4.16852800 |
| Al | 0 | 0.06855500  | 6.15348000  | 4.05604500 |
| Cl | 0 | 0.01451500  | -3.14646500 | 5.88498000 |
| Cl | 0 | -0.02844500 | 7.90242400  | 5.23037800 |
| Al | 0 | 3.82351900  | -5.33159900 | 4.52227200 |
| Cl | 0 | 3.88034100  | -4.85525600 | 6.53572100 |
| H  | 0 | 6.19435200  | -2.30516200 | 3.88723200 |
| Al | 0 | -1.50111000 | 1.11342800  | 4.98226600 |
| O  | 0 | -3.19836900 | 0.68801600  | 5.56035700 |
| O  | 0 | -0.70651500 | 2.21529100  | 6.02032600 |
| O  | 0 | -0.26170100 | -0.12606800 | 4.72406100 |
| C  | 0 | -3.62311900 | -0.08740400 | 6.72213600 |
| C  | 0 | -2.77020200 | -1.33563700 | 6.76442300 |
| C  | 0 | -0.85028200 | 3.61053000  | 6.16857300 |
| C  | 0 | -1.12695100 | 3.95276500  | 7.62265500 |
| C  | 0 | 2.36569900  | 0.58723300  | 6.06657300 |
| C  | 0 | 1.64881500  | 0.01543200  | 7.04093800 |
| H  | 0 | -4.66739800 | -0.35202200 | 6.52648800 |
| C  | 0 | -3.49773100 | 0.76842800  | 7.96839300 |
| H  | 0 | -2.81172900 | -1.86546300 | 5.80860200 |
| H  | 0 | -3.11311500 | -2.01196000 | 7.55066300 |
| H  | 0 | -1.72543000 | -1.08205300 | 6.98335000 |
| H  | 0 | -1.67856900 | 3.98381500  | 5.55067500 |
| C  | 0 | 0.42805400  | 4.26409700  | 5.66409200 |
| H  | 0 | -2.06558700 | 3.49383100  | 7.94195200 |
| H  | 0 | -1.21316600 | 5.03514400  | 7.76032300 |
| H  | 0 | -0.31549400 | 3.57707600  | 8.25383700 |
| H  | 0 | 2.16082700  | 1.62757500  | 5.81204400 |
| C  | 0 | 3.44284800  | -0.10419600 | 5.28718700 |
| H  | 0 | 1.80414300  | -1.02268200 | 7.32512400 |
| H  | 0 | 0.53167100  | 0.11649500  | 5.26999300 |
| H  | 0 | 0.89144700  | 0.58129300  | 7.57788600 |
| H  | 0 | -3.79646400 | 0.18886600  | 8.84550900 |
| H  | 0 | -4.12497900 | 1.66185200  | 7.91138700 |

---

---

|    |   |             |             |            |
|----|---|-------------|-------------|------------|
| H  | 0 | -2.45577000 | 1.08109500  | 8.09609100 |
| H  | 0 | 3.25726600  | -0.02446400 | 4.20832500 |
| H  | 0 | 3.50781200  | -1.16552500 | 5.53732300 |
| H  | 0 | 4.42032600  | 0.35774600  | 5.47058500 |
| H  | 0 | 0.62742900  | 4.00302500  | 4.61485200 |
| H  | 0 | 1.31582300  | 3.92513100  | 6.20963500 |
| H  | 0 | 0.40271700  | 5.35081300  | 5.88911100 |
| O  | 0 | 2.70136100  | 2.63091500  | 3.57586300 |
| O  | 0 | 4.88375500  | 4.98466100  | 3.66401400 |
| O  | 0 | 5.46383200  | 2.16878800  | 3.52197200 |
| Al | 0 | 4.24678000  | 3.19281300  | 4.23816200 |
| Cl | 0 | 4.19809200  | 3.65193200  | 6.30924900 |
| H  | 0 | 4.70108100  | 5.61096500  | 4.38342700 |

**P2<sup>B</sup>-OiPr**

| <b>Atom</b> | <b>Fix/Relax</b> | <b>X</b>    | <b>Y</b>    | <b>Z</b>    |
|-------------|------------------|-------------|-------------|-------------|
| Si          | -1               | -3.84010000 | 5.76010000  | -1.97260000 |
| Si          | -1               | -3.84010000 | 1.92000000  | -1.97259900 |
| Si          | -1               | -3.84010000 | -1.92000000 | -1.97260000 |
| Si          | -1               | -3.84010000 | -5.76010000 | -1.97260000 |
| Si          | -1               | 0.00000000  | 5.76010000  | -1.97260100 |
| Si          | -1               | 0.00000100  | 1.92000000  | -1.97260000 |
| Si          | -1               | 0.00000000  | -1.92000000 | -1.97260000 |
| Si          | -1               | 0.00000000  | -5.76010000 | -1.97260000 |
| Si          | -1               | 3.84010100  | 5.76010000  | -1.97260000 |
| Si          | -1               | 3.84010000  | 1.92000000  | -1.97260000 |
| Si          | -1               | 3.84010000  | -1.91999900 | -1.97260000 |
| Si          | -1               | 3.84010000  | -5.76010000 | -1.97260000 |
| Si          | -1               | -3.84010000 | 7.68020000  | -0.61490000 |
| Si          | -1               | -3.84010100 | 3.84010000  | -0.61489900 |
| Si          | -1               | -3.84010200 | -0.00000100 | -0.61489900 |
| Si          | -1               | -3.84010000 | -3.84010000 | -0.61490000 |
| Si          | -1               | -3.84010000 | -7.68020000 | -0.61490000 |
| Si          | -1               | 0.00000100  | 7.68020000  | -0.61490000 |
| Si          | -1               | -0.00000200 | 3.84010300  | -0.61489600 |
| Si          | -1               | 0.00000100  | -0.00000300 | -0.61490000 |
| Si          | -1               | 0.00000100  | -3.84010000 | -0.61489900 |
| Si          | -1               | 0.00000000  | -7.68020000 | -0.61490000 |

---

---

|    |    |             |             |             |
|----|----|-------------|-------------|-------------|
| Si | -1 | 3.84009900  | 7.68020100  | -0.61489900 |
| Si | -1 | 3.84009900  | 3.84010100  | -0.61490000 |
| Si | -1 | 3.84010100  | -0.00000400 | -0.61489900 |
| Si | -1 | 3.84009900  | -3.84010000 | -0.61490100 |
| Si | -1 | 3.84010000  | -7.68020000 | -0.61490000 |
| Si | -1 | -5.76010000 | 7.68020000  | 0.74280000  |
| Si | -1 | -5.76010300 | 3.84019600  | 0.74280000  |
| Si | -1 | -5.76009200 | -0.00000100 | 0.74289900  |
| Si | -1 | -5.76010100 | -3.84020000 | 0.74270000  |
| Si | -1 | -5.76010100 | -7.68020100 | 0.74280000  |
| Si | -1 | -1.92000200 | 7.68019900  | 0.74280100  |
| Si | -1 | -1.91990000 | 3.84010300  | 0.74279600  |
| Si | -1 | -1.92009800 | 0.00000600  | 0.74289400  |
| Si | -1 | -1.92000300 | -3.84009800 | 0.74279900  |
| Si | -1 | -1.92000100 | -7.68020000 | 0.74280000  |
| Si | -1 | 1.91999800  | 7.68020000  | 0.74280300  |
| Si | -1 | 1.92000800  | 3.84009500  | 0.74279700  |
| Si | -1 | 1.91999600  | 0.00000900  | 0.74280400  |
| Si | -1 | 1.91999800  | -3.84010600 | 0.74280100  |
| Si | -1 | 1.92000000  | -7.68020000 | 0.74280000  |
| Si | -1 | 5.76010900  | 7.68019300  | 0.74280100  |
| Si | -1 | 5.76008200  | 3.84010200  | 0.74279100  |
| Si | -1 | 5.76010800  | 0.00000800  | 0.74280000  |
| Si | -1 | 5.76010000  | -3.84010300 | 0.74279900  |
| Si | -1 | 5.76010000  | -7.68020000 | 0.74280000  |
| H  | -1 | -2.97390000 | 5.79380000  | -3.16220000 |
| H  | -1 | -5.23870000 | 5.77270000  | -2.51530000 |
| H  | -1 | -2.98160000 | 1.92030000  | -3.17130000 |
| H  | -1 | -5.23930000 | 1.92050000  | -2.51900000 |
| H  | -1 | -2.98150000 | -1.92030000 | -3.17120000 |
| H  | -1 | -5.23930000 | -1.92050000 | -2.51900000 |
| H  | -1 | -2.97400000 | -5.79360000 | -3.16220000 |
| H  | -1 | -5.23870000 | -5.77270000 | -2.51530000 |
| H  | -1 | 1.16760000  | 5.71010000  | -2.86270000 |
| H  | -1 | -1.16750000 | 5.71010000  | -2.86280000 |
| H  | -1 | 1.17310000  | 1.91760000  | -2.85730000 |
| H  | -1 | -1.17330000 | 1.91760000  | -2.85710000 |
| H  | -1 | 1.17330000  | -1.91760000 | -2.85710000 |

---

---

|    |    |             |             |             |
|----|----|-------------|-------------|-------------|
| H  | -1 | -1.17310000 | -1.91760000 | -2.85730000 |
| H  | -1 | 1.16750000  | -5.71010000 | -2.86280000 |
| H  | -1 | -1.16760000 | -5.71010000 | -2.86270000 |
| H  | -1 | 5.23870000  | 5.77270000  | -2.51530000 |
| H  | -1 | 2.97400000  | 5.79360000  | -3.16220000 |
| H  | -1 | 5.23930000  | 1.92050000  | -2.51900000 |
| H  | -1 | 2.98150000  | 1.92030000  | -3.17120000 |
| H  | -1 | 5.23930000  | -1.92050000 | -2.51900000 |
| H  | -1 | 2.98160000  | -1.92030000 | -3.17130000 |
| H  | -1 | 5.23870000  | -5.77270000 | -2.51530000 |
| H  | -1 | 2.97390000  | -5.79380000 | -3.16220000 |
| H  | -1 | -3.82400000 | 8.85870000  | -1.53420000 |
| H  | -1 | -3.82400000 | -8.85870000 | -1.53420000 |
| H  | -1 | 0.00000000  | 8.92610000  | -1.42910000 |
| H  | -1 | 0.00000000  | -8.92610000 | -1.42910000 |
| H  | -1 | 3.82400000  | 8.85870000  | -1.53420000 |
| H  | -1 | 3.82400000  | -8.85870000 | -1.53420000 |
| H  | -1 | -7.00580000 | 7.40190000  | -0.01410100 |
| H  | -1 | -5.87799900 | 8.93300000  | 1.52980000  |
| H  | -1 | -7.05960100 | 3.84790100  | 0.03190200  |
| H  | -1 | -7.05810100 | 0.00000000  | 0.02880200  |
| H  | -1 | -7.05950000 | -3.84760000 | 0.03180000  |
| H  | -1 | -5.87620000 | -8.93250000 | 1.53080000  |
| H  | -1 | -7.00650000 | -7.40340000 | -0.01330000 |
| H  | -1 | -1.90149900 | 8.88670000  | 1.61890000  |
| H  | -1 | -1.90150000 | -8.88670000 | 1.61880000  |
| H  | -1 | 1.90150200  | 8.88670000  | 1.61879900  |
| H  | -1 | 1.90150000  | -8.88670000 | 1.61890000  |
| H  | -1 | 5.87619500  | 8.93250100  | 1.53079900  |
| H  | -1 | 7.00650000  | 7.40340100  | -0.01330000 |
| H  | -1 | 7.05950300  | 3.84759800  | 0.03180500  |
| H  | -1 | 7.05810200  | -0.00000300 | 0.02890300  |
| H  | -1 | 7.05959900  | -3.84789900 | 0.03189900  |
| H  | -1 | 7.00580000  | -7.40190000 | -0.01410000 |
| H  | -1 | 5.87800000  | -8.93300000 | 1.52980000  |
| Si | 0  | -5.00527300 | 5.78047300  | 2.04563600  |
| Si | 0  | -5.08349000 | 1.90178000  | 1.89881600  |
| Si | 0  | -4.96550600 | -1.93449700 | 1.99299200  |

---

---

|    |   |             |             |            |
|----|---|-------------|-------------|------------|
| Si | 0 | -5.03887700 | -5.75310700 | 1.94220100 |
| Si | 0 | -2.42540500 | 5.74559700  | 2.03540000 |
| Si | 0 | -2.64494600 | 1.93130000  | 1.88585400 |
| Si | 0 | -2.46489200 | -1.92802400 | 1.99666300 |
| Si | 0 | -2.60349600 | -5.74443000 | 1.93871100 |
| Si | 0 | 2.38883500  | 5.76255600  | 1.94433200 |
| Si | 0 | 2.70549800  | 2.00877200  | 1.98719800 |
| Si | 0 | 2.39868400  | -1.92154400 | 1.99159200 |
| Si | 0 | 2.60501900  | -5.74610100 | 1.93829200 |
| Si | 0 | 4.83539100  | 5.65265200  | 1.98081900 |
| Si | 0 | 5.12571400  | 1.91568100  | 1.91366300 |
| Si | 0 | 4.93579000  | -1.94012400 | 2.00116900 |
| Si | 0 | 5.03891000  | -5.75515100 | 1.94127800 |
| O  | 0 | -5.64176600 | 5.88409600  | 3.57682900 |
| O  | 0 | -5.35175900 | 1.78651500  | 3.54182100 |
| O  | 0 | -5.29933200 | -2.04296300 | 3.64253000 |
| O  | 0 | -5.24973500 | -5.60745800 | 3.60932600 |
| O  | 0 | -1.45255800 | 5.67674900  | 3.40015200 |
| O  | 0 | -2.43826700 | 1.97687800  | 3.63562300 |
| O  | 0 | -1.67845400 | -1.93156700 | 3.44767200 |
| O  | 0 | -2.39155600 | -5.63154900 | 3.60349300 |
| O  | 0 | 1.64441500  | 5.82636300  | 3.42231600 |
| O  | 0 | 1.47569500  | -1.89927200 | 3.35622800 |
| O  | 0 | 2.39399400  | -5.65935900 | 3.60269300 |
| O  | 0 | 5.27980900  | -2.04478500 | 3.63792500 |
| O  | 0 | 5.24705400  | -5.64266600 | 3.60769900 |
| H  | 0 | -5.36677600 | 5.23809900  | 4.24149100 |
| H  | 0 | -6.20024900 | -2.27880100 | 3.89163300 |
| Al | 0 | -4.03432100 | 2.00678600  | 4.61105200 |
| Al | 0 | -3.81415900 | -5.36884200 | 4.52627300 |
| Cl | 0 | -4.33301200 | 3.71649300  | 5.83903300 |
| Cl | 0 | -3.85992900 | -4.93698200 | 6.55254600 |
| Al | 0 | -0.07346200 | -1.85268500 | 4.15682500 |
| Al | 0 | 0.06685700  | 6.16204300  | 4.05204100 |
| Cl | 0 | 0.05177900  | -3.02694800 | 5.92086000 |
| Cl | 0 | -0.02064100 | 7.94435300  | 5.17584000 |
| Al | 0 | 3.81618700  | -5.46079500 | 4.54621600 |
| Cl | 0 | 3.86272400  | -5.21834500 | 6.59931400 |

---



---

|    |   |             |             |            |
|----|---|-------------|-------------|------------|
| H  | 0 | 6.19752000  | -2.15521800 | 3.90917600 |
| Al | 0 | -1.49901200 | 1.14663300  | 4.96806200 |
| O  | 0 | -3.18333700 | 0.69457100  | 5.54886900 |
| O  | 0 | -0.69038500 | 2.24159300  | 5.99630600 |
| O  | 0 | -0.20033600 | -0.02955800 | 4.60782600 |
| C  | 0 | -3.61554100 | -0.08094000 | 6.71040200 |
| C  | 0 | -2.76256300 | -1.32705200 | 6.75040000 |
| C  | 0 | -0.86541500 | 3.63192600  | 6.16976700 |
| C  | 0 | -1.15638400 | 3.94527700  | 7.62722900 |
| H  | 0 | -4.65931000 | -0.34233200 | 6.50783100 |
| C  | 0 | -3.49359900 | 0.77124900  | 7.95898300 |
| H  | 0 | -2.81623300 | -1.86427200 | 5.79968200 |
| H  | 0 | -3.09000400 | -1.99878300 | 7.54706900 |
| H  | 0 | -1.71670300 | -1.06645500 | 6.95494900 |
| H  | 0 | -1.69736900 | 3.99749100  | 5.55234900 |
| C  | 0 | 0.40228600  | 4.31619000  | 5.68187400 |
| H  | 0 | -2.08823100 | 3.46462800  | 7.93373400 |
| H  | 0 | -1.26500900 | 5.02367300  | 7.77936800 |
| H  | 0 | -0.34229700 | 3.57574200  | 8.25772700 |
| H  | 0 | 0.65002800  | 0.36494600  | 4.86733000 |
| H  | 0 | -3.80330800 | 0.18989600  | 8.83110200 |
| H  | 0 | -4.11540600 | 1.66826800  | 7.90095800 |
| H  | 0 | -2.45069600 | 1.07523100  | 8.09779600 |
| H  | 0 | 0.60893300  | 4.06073100  | 4.63240700 |
| H  | 0 | 1.29361400  | 3.98371600  | 6.22376700 |
| H  | 0 | 0.35342900  | 5.40039600  | 5.91453000 |
| O  | 0 | 2.66225100  | 2.55360200  | 3.58353600 |
| O  | 0 | 4.83563800  | 4.95186500  | 3.66938100 |
| O  | 0 | 5.43720000  | 2.15395400  | 3.52564400 |
| Al | 0 | 4.19931000  | 3.14871500  | 4.24721900 |
| Cl | 0 | 4.11516700  | 3.61485800  | 6.31354700 |
| H  | 0 | 4.62360200  | 5.57681700  | 4.38218100 |

**Im1<sup>B-OEt</sup>**

| Atom | Fix/Relax | X           | Y           | Z           |
|------|-----------|-------------|-------------|-------------|
| Si   | -1        | -3.84010000 | 5.76010000  | -1.97260000 |
| Si   | -1        | -3.84010000 | 1.92000000  | -1.97259900 |
| Si   | -1        | -3.84010000 | -1.92000000 | -1.97259900 |

---

---

|    |    |             |             |             |
|----|----|-------------|-------------|-------------|
| Si | -1 | -3.84010000 | -5.76010000 | -1.97260000 |
| Si | -1 | 0.00000000  | 5.76010000  | -1.97260000 |
| Si | -1 | 0.00000000  | 1.92000000  | -1.97259900 |
| Si | -1 | 0.00000000  | -1.92000000 | -1.97259900 |
| Si | -1 | 0.00000000  | -5.76010000 | -1.97260000 |
| Si | -1 | 3.84010000  | 5.76010000  | -1.97260000 |
| Si | -1 | 3.84010000  | 1.91999900  | -1.97260100 |
| Si | -1 | 3.84010000  | -1.92000000 | -1.97260000 |
| Si | -1 | 3.84010000  | -5.76010000 | -1.97260000 |
| Si | -1 | -3.84010000 | 7.68020000  | -0.61490000 |
| Si | -1 | -3.84010200 | 3.84009900  | -0.61490100 |
| Si | -1 | -3.84010200 | 0.00000000  | -0.61490000 |
| Si | -1 | -3.84010000 | -3.84010200 | -0.61490100 |
| Si | -1 | -3.84010000 | -7.68020000 | -0.61490000 |
| Si | -1 | 0.00000000  | 7.68020000  | -0.61490000 |
| Si | -1 | 0.00000000  | 3.84010000  | -0.61490000 |
| Si | -1 | 0.00000400  | -0.00000100 | -0.61490200 |
| Si | -1 | -0.00000100 | -3.84009800 | -0.61490300 |
| Si | -1 | 0.00000000  | -7.68020000 | -0.61490000 |
| Si | -1 | 3.84010000  | 7.68020000  | -0.61490000 |
| Si | -1 | 3.84010000  | 3.84010000  | -0.61490000 |
| Si | -1 | 3.84010200  | 0.00000300  | -0.61489800 |
| Si | -1 | 3.84010100  | -3.84010000 | -0.61489800 |
| Si | -1 | 3.84010000  | -7.68020000 | -0.61490000 |
| Si | -1 | -5.76010100 | 7.68020000  | 0.74279900  |
| Si | -1 | -5.76009400 | 3.84009700  | 0.74280000  |
| Si | -1 | -5.76019500 | 0.00000200  | 0.74279100  |
| Si | -1 | -5.76020000 | -3.84010100 | 0.74280300  |
| Si | -1 | -5.76010100 | -7.68020000 | 0.74279900  |
| Si | -1 | -1.92000000 | 7.68020000  | 0.74280100  |
| Si | -1 | -1.92000200 | 3.84009900  | 0.74279900  |
| Si | -1 | -1.91999800 | 0.00000300  | 0.74279200  |
| Si | -1 | -1.92000100 | -3.84009700 | 0.74280700  |
| Si | -1 | -1.91999900 | -7.68030100 | 0.74280000  |
| Si | -1 | 1.92000100  | 7.68019900  | 0.74280000  |
| Si | -1 | 1.92000100  | 3.84010000  | 0.74280000  |
| Si | -1 | 1.91999300  | -0.00000200 | 0.74280400  |
| Si | -1 | 1.91999800  | -3.84010700 | 0.74279900  |

---

---

|    |    |             |             |             |
|----|----|-------------|-------------|-------------|
| Si | -1 | 1.92000000  | -7.68019800 | 0.74280100  |
| Si | -1 | 5.76010100  | 7.68020000  | 0.74280000  |
| Si | -1 | 5.76010000  | 3.84010000  | 0.74279800  |
| Si | -1 | 5.76009900  | 0.00000200  | 0.74280200  |
| Si | -1 | 5.76009900  | -3.84009600 | 0.74279600  |
| Si | -1 | 5.76010000  | -7.68020000 | 0.74280000  |
| H  | -1 | -2.97390000 | 5.79380000  | -3.16220000 |
| H  | -1 | -5.23870000 | 5.77270000  | -2.51530000 |
| H  | -1 | -2.98160000 | 1.92030000  | -3.17130000 |
| H  | -1 | -5.23930000 | 1.92050000  | -2.51900000 |
| H  | -1 | -2.98150000 | -1.92030000 | -3.17120000 |
| H  | -1 | -5.23930000 | -1.92050000 | -2.51900000 |
| H  | -1 | -2.97400000 | -5.79360000 | -3.16220000 |
| H  | -1 | -5.23870000 | -5.77270000 | -2.51530000 |
| H  | -1 | 1.16760000  | 5.71010000  | -2.86270000 |
| H  | -1 | -1.16750000 | 5.71010000  | -2.86280000 |
| H  | -1 | 1.17310000  | 1.91760000  | -2.85730000 |
| H  | -1 | -1.17330000 | 1.91760000  | -2.85710000 |
| H  | -1 | 1.17330000  | -1.91760000 | -2.85710000 |
| H  | -1 | -1.17310000 | -1.91760000 | -2.85730000 |
| H  | -1 | 1.16750000  | -5.71010000 | -2.86280000 |
| H  | -1 | -1.16760000 | -5.71010000 | -2.86270000 |
| H  | -1 | 5.23870000  | 5.77270000  | -2.51530000 |
| H  | -1 | 2.97400000  | 5.79360000  | -3.16220000 |
| H  | -1 | 5.23930000  | 1.92050000  | -2.51900000 |
| H  | -1 | 2.98150000  | 1.92030000  | -3.17120000 |
| H  | -1 | 5.23930000  | -1.92050000 | -2.51900000 |
| H  | -1 | 2.98160000  | -1.92030000 | -3.17130000 |
| H  | -1 | 5.23870000  | -5.77270000 | -2.51530000 |
| H  | -1 | 2.97390000  | -5.79380000 | -3.16220000 |
| H  | -1 | -3.82400000 | 8.85870000  | -1.53420000 |
| H  | -1 | -3.82400000 | -8.85870000 | -1.53420000 |
| H  | -1 | 0.00000000  | 8.92610000  | -1.42910000 |
| H  | -1 | 0.00000000  | -8.92610000 | -1.42910000 |
| H  | -1 | 3.82400000  | 8.85870000  | -1.53420000 |
| H  | -1 | 3.82400000  | -8.85870000 | -1.53420000 |
| H  | -1 | -7.00580000 | 7.40190000  | -0.01410000 |
| H  | -1 | -5.87800000 | 8.93300000  | 1.52980000  |

---

---

|    |    |             |             |             |
|----|----|-------------|-------------|-------------|
| H  | -1 | -7.05960200 | 3.84790100  | 0.03190300  |
| H  | -1 | -7.05810300 | -0.00000100 | 0.02890600  |
| H  | -1 | -7.05949900 | -3.84760000 | 0.03179900  |
| H  | -1 | -5.87620000 | -8.93250000 | 1.53080000  |
| H  | -1 | -7.00650000 | -7.40340000 | -0.01330000 |
| H  | -1 | -1.90150000 | 8.88670000  | 1.61890000  |
| H  | -1 | -1.90150100 | -8.88670000 | 1.61880000  |
| H  | -1 | 1.90149900  | 8.88670000  | 1.61880000  |
| H  | -1 | 1.90150000  | -8.88670000 | 1.61890000  |
| H  | -1 | 5.87620000  | 8.93250000  | 1.53080000  |
| H  | -1 | 7.00650000  | 7.40340000  | -0.01330000 |
| H  | -1 | 7.05950000  | 3.84760000  | 0.03180000  |
| H  | -1 | 7.05810000  | -0.00000100 | 0.02890000  |
| H  | -1 | 7.05960100  | -3.84790100 | 0.03190200  |
| H  | -1 | 7.00580000  | -7.40190000 | -0.01410000 |
| H  | -1 | 5.87800000  | -8.93300000 | 1.52980000  |
| Si | 0  | -5.00985500 | 5.77897200  | 2.04057500  |
| Si | 0  | -5.04518400 | 1.89669400  | 1.93827500  |
| Si | 0  | -4.96990800 | -1.93678500 | 1.99061000  |
| Si | 0  | -5.04116400 | -5.75315100 | 1.94076400  |
| Si | 0  | -2.44505600 | 5.74720400  | 2.02305800  |
| Si | 0  | -2.61853300 | 1.92492400  | 1.83076700  |
| Si | 0  | -2.46104100 | -1.90488800 | 2.00538000  |
| Si | 0  | -2.60653600 | -5.74396800 | 1.93964800  |
| Si | 0  | 2.36001000  | 5.75451400  | 1.96205900  |
| Si | 0  | 2.70520800  | 2.00999700  | 1.97925300  |
| Si | 0  | 2.37672000  | -1.92731600 | 2.00084500  |
| Si | 0  | 2.60665800  | -5.74422600 | 1.93917300  |
| Si | 0  | 4.82229800  | 5.65005300  | 1.99160200  |
| Si | 0  | 5.12488600  | 1.91536300  | 1.91256500  |
| Si | 0  | 4.92278900  | -1.94457600 | 2.00418900  |
| Si | 0  | 5.04132300  | -5.75391500 | 1.93976100  |
| O  | 0  | -5.62932400 | 5.86546000  | 3.58049700  |
| O  | 0  | -5.17831800 | 1.76721000  | 3.60682000  |
| O  | 0  | -5.33361900 | -2.06898400 | 3.63086300  |
| O  | 0  | -5.25561300 | -5.60917500 | 3.60687500  |
| O  | 0  | -1.50115000 | 5.70432100  | 3.40181300  |
| O  | 0  | -2.30124100 | 1.93512500  | 3.53679100  |

---

---

|    |   |             |             |            |
|----|---|-------------|-------------|------------|
| O  | 0 | -1.66431800 | -1.77967100 | 3.44625600 |
| O  | 0 | -2.39905900 | -5.62664600 | 3.60487900 |
| O  | 0 | 1.57959000  | 5.78075700  | 3.42862600 |
| O  | 0 | 1.44715200  | -1.93960600 | 3.36281000 |
| O  | 0 | 2.40120900  | -5.63568100 | 3.60362100 |
| O  | 0 | 5.25730300  | -2.07423600 | 3.64434900 |
| O  | 0 | 5.25506900  | -5.62098700 | 3.60485300 |
| H  | 0 | -5.28260100 | 5.25921100  | 4.24963400 |
| H  | 0 | -6.22478000 | -2.35947800 | 3.85618100 |
| Al | 0 | -3.80598600 | 2.01107000  | 4.61943500 |
| Al | 0 | -3.82291800 | -5.37349000 | 4.52958900 |
| Cl | 0 | -3.93388800 | 3.82388000  | 5.72834800 |
| Cl | 0 | -3.88105400 | -4.96230300 | 6.55854600 |
| Al | 0 | -0.08182500 | -1.76833500 | 4.20045700 |
| Al | 0 | 0.01924000  | 6.00929300  | 4.13408200 |
| Cl | 0 | -0.14397600 | -2.96778300 | 5.96016900 |
| Cl | 0 | 0.01112600  | 7.40335000  | 5.70401500 |
| Al | 0 | 3.82504600  | -5.38080800 | 4.53085000 |
| Cl | 0 | 3.86618000  | -4.98746900 | 6.56175700 |
| H  | 0 | 6.17080800  | -2.21775000 | 3.91538500 |
| Al | 0 | -1.18021400 | 1.34055400  | 4.83969100 |
| O  | 0 | -2.77594600 | 0.88464300  | 5.63744200 |
| O  | 0 | -0.31492300 | 2.63644700  | 5.50184100 |
| O  | 0 | 0.00008200  | 0.00142400  | 4.81129300 |
| C  | 0 | -2.99456400 | 0.08571000  | 6.82458600 |
| C  | 0 | -3.66532800 | -1.21361600 | 6.44182800 |
| C  | 0 | -0.24527500 | 3.96967600  | 5.85398500 |
| C  | 0 | 0.11610600  | 4.13756600  | 7.32074800 |
| C  | 0 | 1.27780500  | 0.27407000  | 5.52415900 |
| C  | 0 | 1.06533100  | 0.27872100  | 7.02134000 |
| H  | 0 | -3.59054500 | 0.68445600  | 7.51958100 |
| H  | 0 | -2.01304900 | -0.09265900 | 7.27563800 |
| H  | 0 | -4.62489900 | -1.03055400 | 5.94945700 |
| H  | 0 | -3.83485500 | -1.82284500 | 7.33312800 |
| H  | 0 | -3.03088300 | -1.77787000 | 5.75238800 |
| H  | 0 | -1.18832500 | 4.49591700  | 5.63532500 |
| H  | 0 | 0.60733800  | 4.40744600  | 5.26301400 |
| H  | 0 | -0.67452000 | 3.69361200  | 7.93177400 |

---

---

|    |   |            |             |            |
|----|---|------------|-------------|------------|
| H  | 0 | 0.21303400 | 5.19354900  | 7.58080500 |
| H  | 0 | 1.05990000 | 3.62714300  | 7.52628900 |
| H  | 0 | 1.64937900 | 1.22897500  | 5.15241500 |
| H  | 0 | 1.96223400 | -0.52059900 | 5.21798100 |
| H  | 0 | 0.69333100 | -0.68710200 | 7.36956900 |
| H  | 0 | 0.37760700 | 1.07744400  | 7.31440400 |
| H  | 0 | 2.02444000 | 0.47678500  | 7.50888000 |
| O  | 0 | 2.66835200 | 2.57197700  | 3.56519700 |
| O  | 0 | 4.83726700 | 4.95377800  | 3.68615100 |
| O  | 0 | 5.43382000 | 2.15610300  | 3.52667000 |
| Al | 0 | 4.19532400 | 3.15325400  | 4.24694200 |
| Cl | 0 | 4.03100400 | 3.56538800  | 6.31824600 |
| H  | 0 | 4.62007300 | 5.58048300  | 4.39586700 |

**TS1<sup>B-OEt</sup>**

| <b>Atom</b> | <b>Fix/Relax</b> | <b>X</b>    | <b>Y</b>    | <b>Z</b>    |
|-------------|------------------|-------------|-------------|-------------|
| Si          | -1               | -3.84010000 | 5.76010000  | -1.97260000 |
| Si          | -1               | -3.84010000 | 1.92000000  | -1.97260000 |
| Si          | -1               | -3.84010000 | -1.92000000 | -1.97260000 |
| Si          | -1               | -3.84010000 | -5.76010000 | -1.97260000 |
| Si          | -1               | 0.00000000  | 5.76010000  | -1.97260000 |
| Si          | -1               | 0.00000000  | 1.92000000  | -1.97260000 |
| Si          | -1               | 0.00000000  | -1.92000000 | -1.97260000 |
| Si          | -1               | 0.00000000  | -5.76010000 | -1.97260000 |
| Si          | -1               | 3.84010000  | 5.76010000  | -1.97260000 |
| Si          | -1               | 3.84010000  | 1.92000000  | -1.97260000 |
| Si          | -1               | 3.84010000  | -1.92000000 | -1.97260000 |
| Si          | -1               | 3.84010000  | -5.76010000 | -1.97260000 |
| Si          | -1               | -3.84010000 | 7.68020000  | -0.61490000 |
| Si          | -1               | -3.84010000 | 3.84010000  | -0.61490000 |
| Si          | -1               | -3.84010000 | 0.00000000  | -0.61490000 |
| Si          | -1               | -3.84010000 | -3.84010000 | -0.61490000 |
| Si          | -1               | -3.84010000 | -7.68020000 | -0.61490000 |
| Si          | -1               | 0.00000000  | 7.68020000  | -0.61490000 |
| Si          | -1               | 0.00000000  | 3.84010000  | -0.61490000 |
| Si          | -1               | 0.00000000  | 0.00000000  | -0.61490000 |
| Si          | -1               | 0.00000000  | -3.84010000 | -0.61490000 |
| Si          | -1               | 0.00000000  | -7.68020000 | -0.61490000 |

---

---

|    |    |             |             |             |
|----|----|-------------|-------------|-------------|
| Si | -1 | 3.84010000  | 7.68020000  | -0.61490000 |
| Si | -1 | 3.84010000  | 3.84010000  | -0.61490000 |
| Si | -1 | 3.84010000  | 0.00000000  | -0.61490000 |
| Si | -1 | 3.84010000  | -3.84010000 | -0.61490000 |
| Si | -1 | 3.84010000  | -7.68020000 | -0.61490000 |
| Si | -1 | -5.76010000 | 7.68020000  | 0.74280000  |
| Si | -1 | -5.76010000 | 3.84010000  | 0.74280000  |
| Si | -1 | -5.76020000 | 0.00000000  | 0.74280000  |
| Si | -1 | -5.76020000 | -3.84010000 | 0.74280000  |
| Si | -1 | -5.76010000 | -7.68020000 | 0.74280000  |
| Si | -1 | -1.92000000 | 7.68020000  | 0.74280000  |
| Si | -1 | -1.92000000 | 3.84010000  | 0.74280000  |
| Si | -1 | -1.92000000 | 0.00000000  | 0.74280000  |
| Si | -1 | -1.92000000 | -3.84010000 | 0.74280000  |
| Si | -1 | -1.92000000 | -7.68030000 | 0.74280000  |
| Si | -1 | 1.92000000  | 7.68020000  | 0.74280000  |
| Si | -1 | 1.92000000  | 3.84010000  | 0.74280000  |
| Si | -1 | 1.92000000  | 0.00000000  | 0.74280000  |
| Si | -1 | 1.92000000  | -3.84010000 | 0.74280000  |
| Si | -1 | 1.92000000  | -7.68020000 | 0.74280000  |
| Si | -1 | 5.76010000  | 7.68020000  | 0.74280000  |
| Si | -1 | 5.76010000  | 3.84010000  | 0.74280000  |
| Si | -1 | 5.76010000  | 0.00000000  | 0.74280000  |
| Si | -1 | 5.76010000  | -3.84010000 | 0.74280000  |
| Si | -1 | 5.76010000  | -7.68020000 | 0.74280000  |
| H  | -1 | -2.97390000 | 5.79380000  | -3.16220000 |
| H  | -1 | -5.23870000 | 5.77270000  | -2.51530000 |
| H  | -1 | -2.98160000 | 1.92030000  | -3.17130000 |
| H  | -1 | -5.23930000 | 1.92050000  | -2.51900000 |
| H  | -1 | -2.98150000 | -1.92030000 | -3.17120000 |
| H  | -1 | -5.23930000 | -1.92050000 | -2.51900000 |
| H  | -1 | -2.97400000 | -5.79360000 | -3.16220000 |
| H  | -1 | -5.23870000 | -5.77270000 | -2.51530000 |
| H  | -1 | 1.16760000  | 5.71010000  | -2.86270000 |
| H  | -1 | -1.16750000 | 5.71010000  | -2.86280000 |
| H  | -1 | 1.17310000  | 1.91760000  | -2.85730000 |
| H  | -1 | -1.17330000 | 1.91760000  | -2.85710000 |
| H  | -1 | 1.17330000  | -1.91760000 | -2.85710000 |

---

---

|    |    |             |             |             |
|----|----|-------------|-------------|-------------|
| H  | -1 | -1.17310000 | -1.91760000 | -2.85730000 |
| H  | -1 | 1.16750000  | -5.71010000 | -2.86280000 |
| H  | -1 | -1.16760000 | -5.71010000 | -2.86270000 |
| H  | -1 | 5.23870000  | 5.77270000  | -2.51530000 |
| H  | -1 | 2.97400000  | 5.79360000  | -3.16220000 |
| H  | -1 | 5.23930000  | 1.92050000  | -2.51900000 |
| H  | -1 | 2.98150000  | 1.92030000  | -3.17120000 |
| H  | -1 | 5.23930000  | -1.92050000 | -2.51900000 |
| H  | -1 | 2.98160000  | -1.92030000 | -3.17130000 |
| H  | -1 | 5.23870000  | -5.77270000 | -2.51530000 |
| H  | -1 | 2.97390000  | -5.79380000 | -3.16220000 |
| H  | -1 | -3.82400000 | 8.85870000  | -1.53420000 |
| H  | -1 | -3.82400000 | -8.85870000 | -1.53420000 |
| H  | -1 | 0.00000000  | 8.92610000  | -1.42910000 |
| H  | -1 | 0.00000000  | -8.92610000 | -1.42910000 |
| H  | -1 | 3.82400000  | 8.85870000  | -1.53420000 |
| H  | -1 | 3.82400000  | -8.85870000 | -1.53420000 |
| H  | -1 | -7.00580000 | 7.40190000  | -0.01410000 |
| H  | -1 | -5.87800000 | 8.93300000  | 1.52980000  |
| H  | -1 | -7.05960000 | 3.84790000  | 0.03190000  |
| H  | -1 | -7.05810000 | 0.00000000  | 0.02890000  |
| H  | -1 | -7.05950000 | -3.84760000 | 0.03180000  |
| H  | -1 | -5.87620000 | -8.93250000 | 1.53080000  |
| H  | -1 | -7.00650000 | -7.40340000 | -0.01330000 |
| H  | -1 | -1.90150000 | 8.88670000  | 1.61890000  |
| H  | -1 | -1.90150000 | -8.88670000 | 1.61880000  |
| H  | -1 | 1.90150000  | 8.88670000  | 1.61880000  |
| H  | -1 | 1.90150000  | -8.88670000 | 1.61890000  |
| H  | -1 | 5.87620000  | 8.93250000  | 1.53080000  |
| H  | -1 | 7.00650000  | 7.40340000  | -0.01330000 |
| H  | -1 | 7.05950000  | 3.84760000  | 0.03180000  |
| H  | -1 | 7.05810000  | 0.00000000  | 0.02890000  |
| H  | -1 | 7.05960000  | -3.84790000 | 0.03190000  |
| H  | -1 | 7.00580000  | -7.40190000 | -0.01410000 |
| H  | -1 | 5.87800000  | -8.93300000 | 1.52980000  |
| Si | 0  | -5.00690300 | 5.77629500  | 2.04105500  |
| Si | 0  | -5.05253100 | 1.90244500  | 1.93202900  |
| Si | 0  | -4.96234900 | -1.93986000 | 1.99269900  |

---



---

|    |   |             |             |            |
|----|---|-------------|-------------|------------|
| Si | 0 | -5.03915300 | -5.75132500 | 1.93964000 |
| Si | 0 | -2.44124000 | 5.74561400  | 2.02075100 |
| Si | 0 | -2.63436700 | 1.95215600  | 1.83132600 |
| Si | 0 | -2.44629700 | -1.94215300 | 2.01048700 |
| Si | 0 | -2.60250900 | -5.74401700 | 1.93865100 |
| Si | 0 | 2.35764000  | 5.75344200  | 1.96144900 |
| Si | 0 | 2.69506500  | 1.99824600  | 1.98311000 |
| Si | 0 | 2.39766400  | -1.92926400 | 2.00181100 |
| Si | 0 | 2.60470900  | -5.74345300 | 1.93937800 |
| Si | 0 | 4.82038300  | 5.65635400  | 1.97716000 |
| Si | 0 | 5.12111700  | 1.91486600  | 1.90592300 |
| Si | 0 | 4.92692800  | -1.94326600 | 1.99727000 |
| Si | 0 | 5.04094400  | -5.75246200 | 1.93913000 |
| O  | 0 | -5.61575400 | 5.86677600  | 3.58529800 |
| O  | 0 | -5.19175900 | 1.82566500  | 3.59871100 |
| O  | 0 | -5.33361800 | -2.07112000 | 3.63069900 |
| O  | 0 | -5.25391200 | -5.60166300 | 3.60618300 |
| O  | 0 | -1.49247900 | 5.71960000  | 3.40092500 |
| O  | 0 | -2.35567200 | 2.23114700  | 3.51913000 |
| O  | 0 | -1.61907100 | -2.05127600 | 3.42895200 |
| O  | 0 | -2.39481300 | -5.64710500 | 3.60488800 |
| O  | 0 | 1.59089300  | 5.76431700  | 3.43736300 |
| O  | 0 | 1.54058800  | -1.95470600 | 3.40968800 |
| O  | 0 | 2.40202200  | -5.62830900 | 3.60585000 |
| O  | 0 | 5.25192700  | -2.05896200 | 3.64611300 |
| O  | 0 | 5.26021100  | -5.59956800 | 3.60405100 |
| H  | 0 | -5.30121000 | 5.23877800  | 4.25025400 |
| H  | 0 | -6.22992800 | -2.34675300 | 3.85388800 |
| Al | 0 | -3.82583800 | 2.09751800  | 4.61990500 |
| Al | 0 | -3.81760800 | -5.35739400 | 4.51993300 |
| Cl | 0 | -4.10745700 | 3.76534400  | 5.91232100 |
| Cl | 0 | -3.84805000 | -4.92414200 | 6.54612300 |
| Al | 0 | 0.02736700  | 6.01059500  | 4.13338700 |
| Cl | 0 | 0.03502600  | 7.37992100  | 5.72435500 |
| Al | 0 | 3.82714400  | -5.32753600 | 4.51448000 |
| Cl | 0 | 3.86414700  | -4.82307900 | 6.52385500 |
| H  | 0 | 6.15984400  | -2.24286600 | 3.91276000 |
| Al | 0 | -1.15606000 | 1.40594600  | 4.62942000 |

---

---

|    |   |             |             |            |
|----|---|-------------|-------------|------------|
| O  | 0 | -2.74504900 | 0.91284800  | 5.48766700 |
| O  | 0 | -0.25109600 | 2.51810400  | 5.60276300 |
| C  | 0 | -2.95321800 | 0.17996700  | 6.71684500 |
| C  | 0 | -3.60027600 | -1.15039100 | 6.40551500 |
| C  | 0 | -0.40410000 | 3.87065200  | 5.88111900 |
| C  | 0 | -0.26919600 | 4.15275600  | 7.36656400 |
| H  | 0 | -3.56924000 | 0.80407300  | 7.37297900 |
| H  | 0 | -1.97469500 | 0.04441500  | 7.18532700 |
| H  | 0 | -4.56989000 | -1.01123700 | 5.91866300 |
| H  | 0 | -3.74409200 | -1.72252200 | 7.32572600 |
| H  | 0 | -2.96101200 | -1.72838500 | 5.73245000 |
| H  | 0 | -1.36108800 | 4.26719600  | 5.51006200 |
| H  | 0 | 0.44664800  | 4.40316700  | 5.36143100 |
| H  | 0 | -1.05964800 | 3.61326800  | 7.89532100 |
| H  | 0 | -0.36813100 | 5.21929700  | 7.57695900 |
| H  | 0 | 0.70352900  | 3.80937000  | 7.72867100 |
| O  | 0 | 2.68688400  | 2.53807700  | 3.59164100 |
| O  | 0 | 4.83194800  | 4.96527000  | 3.68575500 |
| O  | 0 | 5.44783200  | 2.16034300  | 3.52136600 |
| Al | 0 | 4.21874400  | 3.17985100  | 4.21640200 |
| Cl | 0 | 4.08596400  | 3.55122700  | 6.31188100 |
| H  | 0 | 4.59706800  | 5.59769100  | 4.38484300 |
| Al | 0 | -0.05996400 | -1.43975900 | 3.98981500 |
| O  | 0 | -0.11326800 | 0.30132900  | 3.87256900 |
| Cl | 0 | 0.05362200  | -1.76585600 | 6.15976000 |
| C  | 0 | 1.98189100  | 0.40460700  | 5.58532200 |
| C  | 0 | 1.97043100  | 0.68441200  | 6.98829700 |
| H  | 0 | 1.68687400  | 1.18281300  | 4.88325600 |
| H  | 0 | 2.42845500  | -0.50456200 | 5.17835500 |
| H  | 0 | 2.13375200  | -0.16463000 | 7.64540100 |
| H  | 0 | 1.13450000  | 1.33646700  | 7.25968000 |
| H  | 0 | 2.85198600  | 1.37634900  | 7.01369300 |

**Im2<sup>B-OEt</sup>**

| Atom | Fix/Relax | X           | Y           | Z           |
|------|-----------|-------------|-------------|-------------|
| Si   | -1        | -3.84010000 | 5.76010000  | -1.97260000 |
| Si   | -1        | -3.84010100 | 1.92000100  | -1.97260100 |
| Si   | -1        | -3.84010000 | -1.92000200 | -1.97260000 |

---

---

|    |    |             |             |             |
|----|----|-------------|-------------|-------------|
| Si | -1 | -3.84010000 | -5.76010000 | -1.97260000 |
| Si | -1 | 0.00000000  | 5.76010100  | -1.97260000 |
| Si | -1 | 0.00000100  | 1.92000200  | -1.97259800 |
| Si | -1 | 0.00000100  | -1.92000200 | -1.97259900 |
| Si | -1 | 0.00000000  | -5.76010100 | -1.97260000 |
| Si | -1 | 3.84010000  | 5.76010100  | -1.97259900 |
| Si | -1 | 3.84010000  | 1.92000100  | -1.97260000 |
| Si | -1 | 3.84010000  | -1.92000300 | -1.97260000 |
| Si | -1 | 3.84010100  | -5.76009900 | -1.97260000 |
| Si | -1 | -3.84010000 | 7.68019900  | -0.61490000 |
| Si | -1 | -3.84009800 | 3.84009600  | -0.61489700 |
| Si | -1 | -3.84009800 | 0.00000800  | -0.61490200 |
| Si | -1 | -3.84009900 | -3.84009300 | -0.61489900 |
| Si | -1 | -3.84010000 | -7.68020200 | -0.61489900 |
| Si | -1 | 0.00000000  | 7.68020000  | -0.61489900 |
| Si | -1 | 0.00000600  | 3.84009200  | -0.61490000 |
| Si | -1 | -0.00000200 | 0.00000200  | -0.61491900 |
| Si | -1 | -0.00001000 | -3.84010400 | -0.61490100 |
| Si | -1 | 0.00000200  | -7.68020100 | -0.61489700 |
| Si | -1 | 3.84010000  | 7.68019900  | -0.61490000 |
| Si | -1 | 3.84010100  | 3.84009700  | -0.61490200 |
| Si | -1 | 3.84009400  | 0.00000500  | -0.61491700 |
| Si | -1 | 3.84010200  | -3.84009600 | -0.61488500 |
| Si | -1 | 3.84009900  | -7.68020100 | -0.61489900 |
| Si | -1 | -5.76009800 | 7.68020000  | 0.74280000  |
| Si | -1 | -5.76010400 | 3.84009400  | 0.74279600  |
| Si | -1 | -5.76020300 | -0.00001000 | 0.74278800  |
| Si | -1 | -5.76020300 | -3.84010200 | 0.74279500  |
| Si | -1 | -5.76010000 | -7.68019900 | 0.74280000  |
| Si | -1 | -1.91999600 | 7.68019900  | 0.74279800  |
| Si | -1 | -1.92001500 | 3.84012000  | 0.74279200  |
| Si | -1 | -1.91998500 | -0.00000700 | 0.74281800  |
| Si | -1 | -1.91999200 | -3.84010500 | 0.74281700  |
| Si | -1 | -1.92001000 | -7.68029400 | 0.74279100  |
| Si | -1 | 1.91999900  | 7.68020100  | 0.74279800  |
| Si | -1 | 1.91998700  | 3.84011400  | 0.74280100  |
| Si | -1 | 1.92003300  | -0.00001100 | 0.74284000  |
| Si | -1 | 1.91996800  | -3.84008400 | 0.74276500  |

---

---

|    |    |             |             |             |
|----|----|-------------|-------------|-------------|
| Si | -1 | 1.92001600  | -7.68020300 | 0.74280500  |
| Si | -1 | 5.76010000  | 7.68019900  | 0.74279700  |
| Si | -1 | 5.76009700  | 3.84010100  | 0.74280000  |
| Si | -1 | 5.76010300  | -0.00001300 | 0.74281800  |
| Si | -1 | 5.76011300  | -3.84011700 | 0.74279800  |
| Si | -1 | 5.76010700  | -7.68020100 | 0.74280300  |
| H  | -1 | -2.97390000 | 5.79380000  | -3.16220000 |
| H  | -1 | -5.23870000 | 5.77270000  | -2.51530000 |
| H  | -1 | -2.98160000 | 1.92030000  | -3.17130000 |
| H  | -1 | -5.23930000 | 1.92050000  | -2.51900000 |
| H  | -1 | -2.98150000 | -1.92030000 | -3.17120000 |
| H  | -1 | -5.23930000 | -1.92050000 | -2.51900000 |
| H  | -1 | -2.97400000 | -5.79360000 | -3.16220000 |
| H  | -1 | -5.23870000 | -5.77270000 | -2.51530000 |
| H  | -1 | 1.16760000  | 5.71010000  | -2.86270000 |
| H  | -1 | -1.16750000 | 5.71010000  | -2.86280000 |
| H  | -1 | 1.17310000  | 1.91760000  | -2.85730000 |
| H  | -1 | -1.17330000 | 1.91760000  | -2.85710000 |
| H  | -1 | 1.17330000  | -1.91760000 | -2.85710000 |
| H  | -1 | -1.17310000 | -1.91760000 | -2.85730000 |
| H  | -1 | 1.16750000  | -5.71010000 | -2.86280000 |
| H  | -1 | -1.16760000 | -5.71010000 | -2.86270000 |
| H  | -1 | 5.23870000  | 5.77270000  | -2.51530000 |
| H  | -1 | 2.97400000  | 5.79360000  | -3.16220000 |
| H  | -1 | 5.23930000  | 1.92050000  | -2.51900000 |
| H  | -1 | 2.98150000  | 1.92030000  | -3.17120000 |
| H  | -1 | 5.23930000  | -1.92050000 | -2.51900000 |
| H  | -1 | 2.98160000  | -1.92030000 | -3.17130000 |
| H  | -1 | 5.23870000  | -5.77270000 | -2.51530000 |
| H  | -1 | 2.97390000  | -5.79380000 | -3.16220000 |
| H  | -1 | -3.82400000 | 8.85870000  | -1.53420000 |
| H  | -1 | -3.82400000 | -8.85870000 | -1.53420000 |
| H  | -1 | 0.00000000  | 8.92610000  | -1.42910000 |
| H  | -1 | 0.00000100  | -8.92610000 | -1.42910000 |
| H  | -1 | 3.82400000  | 8.85870000  | -1.53420000 |
| H  | -1 | 3.82400000  | -8.85869900 | -1.53420100 |
| H  | -1 | -7.00580000 | 7.40190000  | -0.01409900 |
| H  | -1 | -5.87799900 | 8.93300000  | 1.52980000  |

---

---

|    |    |             |             |             |
|----|----|-------------|-------------|-------------|
| H  | -1 | -7.05960100 | 3.84790300  | 0.03190200  |
| H  | -1 | -7.05810100 | 0.00000300  | 0.02890200  |
| H  | -1 | -7.05950100 | -3.84760000 | 0.03180200  |
| H  | -1 | -5.87619900 | -8.93250000 | 1.53080000  |
| H  | -1 | -7.00650000 | -7.40340000 | -0.01330000 |
| H  | -1 | -1.90150100 | 8.88670000  | 1.61890100  |
| H  | -1 | -1.90149500 | -8.88669900 | 1.61880100  |
| H  | -1 | 1.90150100  | 8.88670000  | 1.61880000  |
| H  | -1 | 1.90149200  | -8.88669900 | 1.61890100  |
| H  | -1 | 5.87620000  | 8.93250000  | 1.53080100  |
| H  | -1 | 7.00650100  | 7.40340000  | -0.01329900 |
| H  | -1 | 7.05950000  | 3.84760000  | 0.03180000  |
| H  | -1 | 7.05809300  | 0.00000400  | 0.02888800  |
| H  | -1 | 7.05959800  | -3.84789500 | 0.03189700  |
| H  | -1 | 7.00579800  | -7.40189800 | -0.01410300 |
| H  | -1 | 5.87799900  | -8.93300000 | 1.52980000  |
| Si | 0  | -5.00488100 | 5.77662300  | 2.04252900  |
| Si | 0  | -5.05601500 | 1.90451400  | 1.93113700  |
| Si | 0  | -4.96779000 | -1.93930000 | 1.99714300  |
| Si | 0  | -5.04295200 | -5.75249700 | 1.93887700  |
| Si | 0  | -2.44038500 | 5.74239800  | 2.02649800  |
| Si | 0  | -2.63987000 | 1.95615600  | 1.82636000  |
| Si | 0  | -2.45461000 | -1.94260400 | 2.01050900  |
| Si | 0  | -2.60523900 | -5.74302000 | 1.93849800  |
| Si | 0  | 2.35726400  | 5.75365100  | 1.96463600  |
| Si | 0  | 2.68668100  | 2.00373900  | 1.99642900  |
| Si | 0  | 2.41944600  | -1.92722300 | 1.98296900  |
| Si | 0  | 2.60792700  | -5.73798000 | 1.93875700  |
| Si | 0  | 4.82012900  | 5.64803900  | 1.99308600  |
| Si | 0  | 5.11249500  | 1.91523400  | 1.91128100  |
| Si | 0  | 4.93675100  | -1.94857500 | 1.99533400  |
| Si | 0  | 5.04587500  | -5.75054100 | 1.94061600  |
| O  | 0  | -5.61778200 | 5.86375400  | 3.58540000  |
| O  | 0  | -5.19627000 | 1.82727500  | 3.59701200  |
| O  | 0  | -5.32098900 | -2.07394500 | 3.64006500  |
| O  | 0  | -5.26220000 | -5.60336300 | 3.60661900  |
| O  | 0  | -1.50293400 | 5.69723900  | 3.41069300  |
| O  | 0  | -2.36725900 | 2.26137900  | 3.50547400  |

---

---

|    |   |             |             |            |
|----|---|-------------|-------------|------------|
| O  | 0 | -1.59975000 | -2.04015500 | 3.43495100 |
| O  | 0 | -2.39837200 | -5.63173700 | 3.60653400 |
| O  | 0 | 1.57747100  | 5.77462600  | 3.43109100 |
| O  | 0 | 2.67190700  | 2.56454200  | 3.57874500 |
| O  | 0 | 1.52749000  | -1.94551400 | 3.38297100 |
| O  | 0 | 2.40593000  | -5.57198200 | 3.60345600 |
| O  | 0 | 4.83924200  | 4.94735400  | 3.68468400 |
| O  | 0 | 5.43705200  | 2.14638800  | 3.52391500 |
| O  | 0 | 5.23683800  | -2.12457500 | 3.64408800 |
| O  | 0 | 5.26592700  | -5.57142300 | 3.60527100 |
| H  | 0 | -5.27443700 | 5.26155200  | 4.25991400 |
| H  | 0 | -6.22687900 | -2.30560700 | 3.87501000 |
| Al | 0 | -3.82812500 | 2.11552100  | 4.61249300 |
| Al | 0 | -3.82653600 | -5.33917300 | 4.51157300 |
| Cl | 0 | -4.09801900 | 3.77656100  | 5.91052800 |
| Cl | 0 | -3.83055100 | -4.85130400 | 6.52815200 |
| Al | 0 | -0.04879900 | -1.32867900 | 3.81340200 |
| Al | 0 | 0.01830600  | 5.99782400  | 4.14258300 |
| Cl | 0 | 0.01068200  | 7.40607500  | 5.69985000 |
| Al | 0 | 3.83476300  | -5.19804500 | 4.48012700 |
| Al | 0 | 4.19966900  | 3.14224000  | 4.25011500 |
| Cl | 0 | 3.81870300  | -4.51950400 | 6.44359300 |
| Cl | 0 | 4.10404400  | 3.55689900  | 6.32814200 |
| H  | 0 | 4.62648500  | 5.57224500  | 4.39721200 |
| H  | 0 | 6.14750600  | -2.27288700 | 3.92370400 |
| Al | 0 | -1.15083600 | 1.50034300  | 4.63890400 |
| O  | 0 | -2.74630500 | 0.91353500  | 5.45649400 |
| O  | 0 | -0.41698300 | 2.59714300  | 5.72963900 |
| O  | 0 | -0.14086900 | 0.37644600  | 3.86992900 |
| C  | 0 | -2.90698000 | 0.24252600  | 6.72014300 |
| C  | 0 | -3.45799500 | -1.14711900 | 6.48336100 |
| C  | 0 | -0.28162800 | 3.95224200  | 5.96428400 |
| C  | 0 | 0.24712400  | 4.20398200  | 7.36582300 |
| H  | 0 | -3.56710500 | 0.85058100  | 7.34772000 |
| H  | 0 | -1.92520000 | 0.21402900  | 7.20496300 |
| H  | 0 | -4.43535800 | -1.09914100 | 5.99479300 |
| H  | 0 | -3.56059600 | -1.68556600 | 7.42886000 |
| H  | 0 | -2.79359300 | -1.71310000 | 5.82352600 |

---

---

|    |   |             |             |            |
|----|---|-------------|-------------|------------|
| H  | 0 | -1.23318400 | 4.48680200  | 5.81076400 |
| H  | 0 | 0.50154800  | 4.34708500  | 5.24746300 |
| H  | 0 | -0.47184300 | 3.80524600  | 8.08567900 |
| H  | 0 | 0.38264300  | 5.27059800  | 7.55316000 |
| H  | 0 | 1.20354800  | 3.69209200  | 7.49365900 |
| Cl | 0 | 0.23716700  | -1.72886700 | 6.14878600 |
| C  | 0 | 1.77774200  | -0.69323800 | 6.30586900 |
| C  | 0 | 1.60494900  | 0.30877500  | 7.41870800 |
| H  | 0 | 1.89057100  | -0.22268800 | 5.32859700 |
| H  | 0 | 2.55934000  | -1.43344700 | 6.47055800 |
| H  | 0 | 2.54041100  | 0.87249700  | 7.49961600 |
| H  | 0 | 1.40795200  | -0.17676300 | 8.37658000 |
| H  | 0 | 0.81155600  | 1.02338500  | 7.18335100 |

**P1<sup>B-OEt</sup>**

| <b>Atom</b> | <b>Fix/Relax</b> | <b>X</b>    | <b>Y</b>    | <b>Z</b>    |
|-------------|------------------|-------------|-------------|-------------|
| Si          | -1               | -3.84010000 | 5.76010000  | -1.97260000 |
| Si          | -1               | -3.84010000 | 1.92000000  | -1.97260000 |
| Si          | -1               | -3.84010000 | -1.92000000 | -1.97260000 |
| Si          | -1               | -3.84010000 | -5.76010000 | -1.97260000 |
| Si          | -1               | 0.00000000  | 5.76010000  | -1.97260000 |
| Si          | -1               | 0.00000000  | 1.92000000  | -1.97260000 |
| Si          | -1               | 0.00000000  | -1.92000000 | -1.97260000 |
| Si          | -1               | 0.00000000  | -5.76010000 | -1.97260000 |
| Si          | -1               | 3.84010000  | 5.76010000  | -1.97260000 |
| Si          | -1               | 3.84010000  | 1.92000000  | -1.97260000 |
| Si          | -1               | 3.84010000  | -1.92000000 | -1.97260000 |
| Si          | -1               | 3.84010000  | -5.76010000 | -1.97260000 |
| Si          | -1               | -3.84010000 | 7.68020000  | -0.61490000 |
| Si          | -1               | -3.84010000 | 3.84010000  | -0.61490000 |
| Si          | -1               | -3.84010000 | 0.00000000  | -0.61490000 |
| Si          | -1               | -3.84010000 | -3.84010000 | -0.61490000 |
| Si          | -1               | -3.84010000 | -7.68020000 | -0.61490000 |
| Si          | -1               | 0.00000000  | 7.68020000  | -0.61490000 |
| Si          | -1               | 0.00000000  | 3.84010000  | -0.61490000 |
| Si          | -1               | 0.00000000  | 0.00000000  | -0.61490000 |
| Si          | -1               | 0.00000000  | -3.84010000 | -0.61490000 |
| Si          | -1               | 0.00000000  | -7.68020000 | -0.61490000 |

---

---

|    |    |             |             |             |
|----|----|-------------|-------------|-------------|
| Si | -1 | 3.84010000  | 7.68020000  | -0.61490000 |
| Si | -1 | 3.84010000  | 3.84010000  | -0.61490000 |
| Si | -1 | 3.84010000  | 0.00000000  | -0.61490000 |
| Si | -1 | 3.84010000  | -3.84010000 | -0.61490000 |
| Si | -1 | 3.84010000  | -7.68020000 | -0.61490000 |
| Si | -1 | -5.76010000 | 7.68020000  | 0.74280000  |
| Si | -1 | -5.76010000 | 3.84010000  | 0.74280000  |
| Si | -1 | -5.76020000 | 0.00000000  | 0.74280000  |
| Si | -1 | -5.76020000 | -3.84010000 | 0.74280000  |
| Si | -1 | -5.76010000 | -7.68020000 | 0.74280000  |
| Si | -1 | -1.92000000 | 7.68020000  | 0.74280000  |
| Si | -1 | -1.92000000 | 3.84010000  | 0.74280000  |
| Si | -1 | -1.92000000 | 0.00000000  | 0.74280000  |
| Si | -1 | -1.92000000 | -3.84010000 | 0.74280000  |
| Si | -1 | -1.92000000 | -7.68030000 | 0.74280000  |
| Si | -1 | 1.92000000  | 7.68020000  | 0.74280000  |
| Si | -1 | 1.92000000  | 3.84010000  | 0.74280000  |
| Si | -1 | 1.92000000  | 0.00000000  | 0.74280000  |
| Si | -1 | 1.92000000  | -3.84010000 | 0.74280000  |
| Si | -1 | 1.92000000  | -7.68020000 | 0.74280000  |
| Si | -1 | 5.76010000  | 7.68020000  | 0.74280000  |
| Si | -1 | 5.76010000  | 3.84010000  | 0.74280000  |
| Si | -1 | 5.76010000  | 0.00000000  | 0.74280000  |
| Si | -1 | 5.76010000  | -3.84010000 | 0.74280000  |
| Si | -1 | 5.76010000  | -7.68020000 | 0.74280000  |
| H  | -1 | -2.97390000 | 5.79380000  | -3.16220000 |
| H  | -1 | -5.23870000 | 5.77270000  | -2.51530000 |
| H  | -1 | -2.98160000 | 1.92030000  | -3.17130000 |
| H  | -1 | -5.23930000 | 1.92050000  | -2.51900000 |
| H  | -1 | -2.98150000 | -1.92030000 | -3.17120000 |
| H  | -1 | -5.23930000 | -1.92050000 | -2.51900000 |
| H  | -1 | -2.97400000 | -5.79360000 | -3.16220000 |
| H  | -1 | -5.23870000 | -5.77270000 | -2.51530000 |
| H  | -1 | 1.16760000  | 5.71010000  | -2.86270000 |
| H  | -1 | -1.16750000 | 5.71010000  | -2.86280000 |
| H  | -1 | 1.17310000  | 1.91760000  | -2.85730000 |
| H  | -1 | -1.17330000 | 1.91760000  | -2.85710000 |
| H  | -1 | 1.17330000  | -1.91760000 | -2.85710000 |

---



---

|    |    |             |             |             |
|----|----|-------------|-------------|-------------|
| H  | -1 | -1.17310000 | -1.91760000 | -2.85730000 |
| H  | -1 | 1.16750000  | -5.71010000 | -2.86280000 |
| H  | -1 | -1.16760000 | -5.71010000 | -2.86270000 |
| H  | -1 | 5.23870000  | 5.77270000  | -2.51530000 |
| H  | -1 | 2.97400000  | 5.79360000  | -3.16220000 |
| H  | -1 | 5.23930000  | 1.92050000  | -2.51900000 |
| H  | -1 | 2.98150000  | 1.92030000  | -3.17120000 |
| H  | -1 | 5.23930000  | -1.92050000 | -2.51900000 |
| H  | -1 | 2.98160000  | -1.92030000 | -3.17130000 |
| H  | -1 | 5.23870000  | -5.77270000 | -2.51530000 |
| H  | -1 | 2.97390000  | -5.79380000 | -3.16220000 |
| H  | -1 | -3.82400000 | 8.85870000  | -1.53420000 |
| H  | -1 | -3.82400000 | -8.85870000 | -1.53420000 |
| H  | -1 | 0.00000000  | 8.92610000  | -1.42910000 |
| H  | -1 | 0.00000000  | -8.92610000 | -1.42910000 |
| H  | -1 | 3.82400000  | 8.85870000  | -1.53420000 |
| H  | -1 | 3.82400000  | -8.85870000 | -1.53420000 |
| H  | -1 | -7.00580000 | 7.40190000  | -0.01410000 |
| H  | -1 | -5.87800000 | 8.93300000  | 1.52980000  |
| H  | -1 | -7.05960000 | 3.84790000  | 0.03190000  |
| H  | -1 | -7.05810000 | 0.00000000  | 0.02890000  |
| H  | -1 | -7.05950000 | -3.84760000 | 0.03180000  |
| H  | -1 | -5.87620000 | -8.93250000 | 1.53080000  |
| H  | -1 | -7.00650000 | -7.40340000 | -0.01330000 |
| H  | -1 | -1.90150000 | 8.88670000  | 1.61890000  |
| H  | -1 | -1.90150000 | -8.88670000 | 1.61880000  |
| H  | -1 | 1.90150000  | 8.88670000  | 1.61880000  |
| H  | -1 | 1.90150000  | -8.88670000 | 1.61890000  |
| H  | -1 | 5.87620000  | 8.93250000  | 1.53080000  |
| H  | -1 | 7.00650000  | 7.40340000  | -0.01330000 |
| H  | -1 | 7.05950000  | 3.84760000  | 0.03180000  |
| H  | -1 | 7.05810000  | 0.00000000  | 0.02890000  |
| H  | -1 | 7.05960000  | -3.84790000 | 0.03190000  |
| H  | -1 | 7.00580000  | -7.40190000 | -0.01410000 |
| H  | -1 | 5.87800000  | -8.93300000 | 1.52980000  |
| Si | 0  | -5.02185400 | 5.78602100  | 2.03754500  |
| Si | 0  | -5.05253700 | 1.90972000  | 1.94138700  |
| Si | 0  | -4.97435300 | -1.93858400 | 1.99105100  |

---

---

|    |   |             |             |            |
|----|---|-------------|-------------|------------|
| Si | 0 | -5.04511000 | -5.75355600 | 1.93986400 |
| Si | 0 | -2.45175600 | 5.74706700  | 2.02883300 |
| Si | 0 | -2.62471000 | 1.94441100  | 1.86040900 |
| Si | 0 | -2.47029400 | -1.94396200 | 1.98209400 |
| Si | 0 | -2.60840700 | -5.74268400 | 1.94115300 |
| Si | 0 | 2.35089600  | 5.75299900  | 1.96949400 |
| Si | 0 | 2.71638300  | 2.02540800  | 2.00122900 |
| Si | 0 | 2.42140400  | -1.92487800 | 1.98913400 |
| Si | 0 | 2.60923900  | -5.74456400 | 1.93794800 |
| Si | 0 | 4.82559700  | 5.64788300  | 1.99505100 |
| Si | 0 | 5.13497200  | 1.91652400  | 1.92123500 |
| Si | 0 | 4.94965400  | -1.94113300 | 2.00268900 |
| Si | 0 | 5.04487500  | -5.75653300 | 1.93762300 |
| O  | 0 | -5.68635400 | 5.91395200  | 3.55336500 |
| O  | 0 | -5.20924000 | 1.86143500  | 3.60882100 |
| O  | 0 | -5.29789400 | -2.05394100 | 3.63683700 |
| O  | 0 | -5.26549200 | -5.60673200 | 3.60615900 |
| O  | 0 | -1.52086200 | 5.69993700  | 3.41338200 |
| O  | 0 | -2.35911800 | 2.11366700  | 3.56067000 |
| O  | 0 | -1.58917800 | -2.00475700 | 3.39287500 |
| O  | 0 | -2.40468300 | -5.62293800 | 3.60830200 |
| O  | 0 | 1.55227600  | 5.75632200  | 3.42264900 |
| O  | 0 | 1.48066800  | -1.90206000 | 3.37163200 |
| O  | 0 | 2.40427500  | -5.64594200 | 3.60629500 |
| O  | 0 | 5.28468500  | -2.06529700 | 3.63978400 |
| O  | 0 | 5.26543400  | -5.64688300 | 3.60485100 |
| H  | 0 | -5.37070000 | 5.32245900  | 4.25006700 |
| H  | 0 | -6.21025700 | -2.20915600 | 3.90554300 |
| Al | 0 | -3.85823100 | 2.21726900  | 4.62430400 |
| Al | 0 | -3.83377200 | -5.33240000 | 4.51479800 |
| Cl | 0 | -4.06937800 | 4.04473000  | 5.70261900 |
| Cl | 0 | -3.83978700 | -4.81901000 | 6.52330400 |
| Al | 0 | -0.07030600 | -1.26283400 | 3.75867100 |
| Al | 0 | 0.00165200  | 6.04745800  | 4.12932900 |
| Cl | 0 | 0.00320900  | 7.58319400  | 5.56331100 |
| Al | 0 | 3.83570500  | -5.44523700 | 4.53438000 |
| Cl | 0 | 3.84248600  | -5.12322400 | 6.57966700 |
| H  | 0 | 6.20204400  | -2.16788600 | 3.91560000 |

---

---

|    |   |             |             |            |
|----|---|-------------|-------------|------------|
| Al | 0 | -1.22043700 | 1.54606200  | 4.89539400 |
| O  | 0 | -2.86898000 | 1.15811800  | 5.72777500 |
| O  | 0 | -0.50102600 | 2.81786900  | 5.76563900 |
| O  | 0 | -0.22141700 | 0.23046500  | 4.51392700 |
| C  | 0 | -2.99547900 | 0.99964400  | 7.15506300 |
| C  | 0 | -1.90302900 | 0.08016200  | 7.65926000 |
| C  | 0 | -0.38034400 | 4.16502400  | 6.00812000 |
| C  | 0 | 0.04324100  | 4.43411200  | 7.44262200 |
| H  | 0 | -3.98559900 | 0.57982900  | 7.35167600 |
| H  | 0 | -2.93130900 | 1.98964400  | 7.61921600 |
| H  | 0 | -1.95804100 | -0.88901400 | 7.15682200 |
| H  | 0 | -2.01513300 | -0.07791000 | 8.73447600 |
| H  | 0 | -0.91328600 | 0.51837000  | 7.48882000 |
| H  | 0 | -1.31105000 | 4.70753400  | 5.77886600 |
| H  | 0 | 0.46715300  | 4.54816200  | 5.35898700 |
| H  | 0 | -0.74072600 | 4.07114100  | 8.11229300 |
| H  | 0 | 0.18874500  | 5.50230700  | 7.61575100 |
| H  | 0 | 0.96979500  | 3.89885600  | 7.65834900 |
| O  | 0 | 2.69985700  | 2.60990900  | 3.56907300 |
| O  | 0 | 4.87311700  | 4.95932500  | 3.67829700 |
| O  | 0 | 5.45528200  | 2.15073600  | 3.53085000 |
| Al | 0 | 4.22631700  | 3.15736000  | 4.26555900 |
| Cl | 0 | 4.16931000  | 3.64082600  | 6.32470600 |
| H  | 0 | 4.68212000  | 5.58187900  | 4.39905600 |

**TS2<sup>B-OEt</sup>**

| <b>Atom</b> | <b>Fix/Relax</b> | <b>X</b>    | <b>Y</b>    | <b>Z</b>    |
|-------------|------------------|-------------|-------------|-------------|
| Si          | -1               | -3.84010000 | 5.76010000  | -1.97260000 |
| Si          | -1               | -3.84010000 | 1.92000000  | -1.97260000 |
| Si          | -1               | -3.84010000 | -1.92000000 | -1.97260000 |
| Si          | -1               | -3.84010000 | -5.76010000 | -1.97260000 |
| Si          | -1               | 0.00000000  | 5.76010000  | -1.97260000 |
| Si          | -1               | 0.00000000  | 1.92000000  | -1.97260000 |
| Si          | -1               | 0.00000000  | -1.92000000 | -1.97260000 |
| Si          | -1               | 0.00000000  | -5.76010000 | -1.97260000 |
| Si          | -1               | 3.84010000  | 5.76010000  | -1.97260000 |
| Si          | -1               | 3.84010000  | 1.92000000  | -1.97260000 |
| Si          | -1               | 3.84010000  | -1.92000000 | -1.97260000 |

---

---

|    |    |             |             |             |
|----|----|-------------|-------------|-------------|
| Si | -1 | 3.84010000  | -5.76010000 | -1.97260000 |
| Si | -1 | -3.84010000 | 7.68020000  | -0.61490000 |
| Si | -1 | -3.84010000 | 3.84010000  | -0.61490000 |
| Si | -1 | -3.84010000 | 0.00000000  | -0.61490000 |
| Si | -1 | -3.84010000 | -3.84010000 | -0.61490000 |
| Si | -1 | -3.84010000 | -7.68020000 | -0.61490000 |
| Si | -1 | 0.00000000  | 7.68020000  | -0.61490000 |
| Si | -1 | 0.00000000  | 3.84010000  | -0.61490000 |
| Si | -1 | 0.00000000  | 0.00000000  | -0.61490000 |
| Si | -1 | 0.00000000  | -3.84010000 | -0.61490000 |
| Si | -1 | 0.00000000  | -7.68020000 | -0.61490000 |
| Si | -1 | 3.84010000  | 7.68020000  | -0.61490000 |
| Si | -1 | 3.84010000  | 3.84010000  | -0.61490000 |
| Si | -1 | 3.84010000  | 0.00000000  | -0.61490000 |
| Si | -1 | 3.84010000  | -3.84010000 | -0.61490000 |
| Si | -1 | 3.84010000  | -7.68020000 | -0.61490000 |
| Si | -1 | -5.76010000 | 7.68020000  | 0.74280000  |
| Si | -1 | -5.76010000 | 3.84010000  | 0.74280000  |
| Si | -1 | -5.76020000 | 0.00000000  | 0.74280000  |
| Si | -1 | -5.76020000 | -3.84010000 | 0.74280000  |
| Si | -1 | -5.76010000 | -7.68020000 | 0.74280000  |
| Si | -1 | -1.92000000 | 7.68020000  | 0.74280000  |
| Si | -1 | -1.92000000 | 3.84010000  | 0.74280000  |
| Si | -1 | -1.92000000 | 0.00000000  | 0.74280000  |
| Si | -1 | -1.92000000 | -3.84010000 | 0.74280000  |
| Si | -1 | -1.92000000 | -7.68030000 | 0.74280000  |
| Si | -1 | 1.92000000  | 7.68020000  | 0.74280000  |
| Si | -1 | 1.92000000  | 3.84010000  | 0.74280000  |
| Si | -1 | 1.92000000  | 0.00000000  | 0.74280000  |
| Si | -1 | 1.92000000  | -3.84010000 | 0.74280000  |
| Si | -1 | 1.92000000  | -7.68020000 | 0.74280000  |
| Si | -1 | 5.76010000  | 7.68020000  | 0.74280000  |
| Si | -1 | 5.76010000  | 3.84010000  | 0.74280000  |
| Si | -1 | 5.76010000  | 0.00000000  | 0.74280000  |
| Si | -1 | 5.76010000  | -3.84010000 | 0.74280000  |
| Si | -1 | 5.76010000  | -7.68020000 | 0.74280000  |
| H  | -1 | -2.97390000 | 5.79380000  | -3.16220000 |
| H  | -1 | -5.23870000 | 5.77270000  | -2.51530000 |

---

---

|   |    |             |             |             |
|---|----|-------------|-------------|-------------|
| H | -1 | -2.98160000 | 1.92030000  | -3.17130000 |
| H | -1 | -5.23930000 | 1.92050000  | -2.51900000 |
| H | -1 | -2.98150000 | -1.92030000 | -3.17120000 |
| H | -1 | -5.23930000 | -1.92050000 | -2.51900000 |
| H | -1 | -2.97400000 | -5.79360000 | -3.16220000 |
| H | -1 | -5.23870000 | -5.77270000 | -2.51530000 |
| H | -1 | 1.16760000  | 5.71010000  | -2.86270000 |
| H | -1 | -1.16750000 | 5.71010000  | -2.86280000 |
| H | -1 | 1.17310000  | 1.91760000  | -2.85730000 |
| H | -1 | -1.17330000 | 1.91760000  | -2.85710000 |
| H | -1 | 1.17330000  | -1.91760000 | -2.85710000 |
| H | -1 | -1.17310000 | -1.91760000 | -2.85730000 |
| H | -1 | 1.16750000  | -5.71010000 | -2.86280000 |
| H | -1 | -1.16760000 | -5.71010000 | -2.86270000 |
| H | -1 | 5.23870000  | 5.77270000  | -2.51530000 |
| H | -1 | 2.97400000  | 5.79360000  | -3.16220000 |
| H | -1 | 5.23930000  | 1.92050000  | -2.51900000 |
| H | -1 | 2.98150000  | 1.92030000  | -3.17120000 |
| H | -1 | 5.23930000  | -1.92050000 | -2.51900000 |
| H | -1 | 2.98160000  | -1.92030000 | -3.17130000 |
| H | -1 | 5.23870000  | -5.77270000 | -2.51530000 |
| H | -1 | 2.97390000  | -5.79380000 | -3.16220000 |
| H | -1 | -3.82400000 | 8.85870000  | -1.53420000 |
| H | -1 | -3.82400000 | -8.85870000 | -1.53420000 |
| H | -1 | 0.00000000  | 8.92610000  | -1.42910000 |
| H | -1 | 0.00000000  | -8.92610000 | -1.42910000 |
| H | -1 | 3.82400000  | 8.85870000  | -1.53420000 |
| H | -1 | 3.82400000  | -8.85870000 | -1.53420000 |
| H | -1 | -7.00580000 | 7.40190000  | -0.01410000 |
| H | -1 | -5.87800000 | 8.93300000  | 1.52980000  |
| H | -1 | -7.05960000 | 3.84790000  | 0.03190000  |
| H | -1 | -7.05810000 | 0.00000000  | 0.02890000  |
| H | -1 | -7.05950000 | -3.84760000 | 0.03180000  |
| H | -1 | -5.87620000 | -8.93250000 | 1.53080000  |
| H | -1 | -7.00650000 | -7.40340000 | -0.01330000 |
| H | -1 | -1.90150000 | 8.88670000  | 1.61890000  |
| H | -1 | -1.90150000 | -8.88670000 | 1.61880000  |
| H | -1 | 1.90150000  | 8.88670000  | 1.61880000  |

---

---

|    |    |             |             |             |
|----|----|-------------|-------------|-------------|
| H  | -1 | 1.90150000  | -8.88670000 | 1.61890000  |
| H  | -1 | 5.87620000  | 8.93250000  | 1.53080000  |
| H  | -1 | 7.00650000  | 7.40340000  | -0.01330000 |
| H  | -1 | 7.05950000  | 3.84760000  | 0.03180000  |
| H  | -1 | 7.05810000  | 0.00000000  | 0.02890000  |
| H  | -1 | 7.05960000  | -3.84790000 | 0.03190000  |
| H  | -1 | 7.00580000  | -7.40190000 | -0.01410000 |
| H  | -1 | 5.87800000  | -8.93300000 | 1.52980000  |
| Si | 0  | -5.01130000 | 5.77870000  | 2.03980000  |
| Si | 0  | -5.04810000 | 1.90190000  | 1.93640000  |
| Si | 0  | -4.96340000 | -1.93980000 | 1.98960000  |
| Si | 0  | -5.03770000 | -5.75120000 | 1.94030000  |
| Si | 0  | -2.44480000 | 5.74630000  | 2.02140000  |
| Si | 0  | -2.62500000 | 1.94690000  | 1.84280000  |
| Si | 0  | -2.44960000 | -1.94010000 | 2.00420000  |
| Si | 0  | -2.60170000 | -5.74440000 | 1.93860000  |
| Si | 0  | 2.35690000  | 5.75290000  | 1.96450000  |
| Si | 0  | 2.70600000  | 2.00630000  | 1.96980000  |
| Si | 0  | 2.38110000  | -1.92840000 | 2.01180000  |
| Si | 0  | 2.60450000  | -5.74360000 | 1.93950000  |
| Si | 0  | 4.82150000  | 5.65420000  | 1.98550000  |
| Si | 0  | 5.12680000  | 1.91390000  | 1.90360000  |
| Si | 0  | 4.92010000  | -1.94360000 | 2.00010000  |
| Si | 0  | 5.04030000  | -5.75230000 | 1.93970000  |
| O  | 0  | -5.63020000 | 5.87710000  | 3.57860000  |
| O  | 0  | -5.18770000 | 1.82120000  | 3.60370000  |
| O  | 0  | -5.33620000 | -2.06890000 | 3.62730000  |
| O  | 0  | -5.24990000 | -5.60220000 | 3.60680000  |
| O  | 0  | -1.49810000 | 5.71470000  | 3.40200000  |
| O  | 0  | -2.33320000 | 2.16250000  | 3.54110000  |
| O  | 0  | -1.63690000 | -2.03190000 | 3.42470000  |
| O  | 0  | -2.39200000 | -5.65030000 | 3.60400000  |
| O  | 0  | 1.58380000  | 5.77200000  | 3.43660000  |
| O  | 0  | 2.69160000  | 2.57870000  | 3.56100000  |
| O  | 0  | 1.51820000  | -1.94440000 | 3.41280000  |
| O  | 0  | 2.40100000  | -5.62640000 | 3.60500000  |
| O  | 0  | 4.83970000  | 4.96610000  | 3.69820000  |
| O  | 0  | 5.44850000  | 2.15930000  | 3.51820000  |

---

---

|    |   |             |             |            |
|----|---|-------------|-------------|------------|
| O  | 0 | 5.25140000  | -2.05860000 | 3.64680000 |
| O  | 0 | 5.25720000  | -5.59900000 | 3.60440000 |
| H  | 0 | -5.31180000 | 5.25730000  | 4.24950000 |
| H  | 0 | -6.22680000 | -2.36410000 | 3.84830000 |
| Al | 0 | -3.83000000 | 2.10770000  | 4.62990000 |
| Al | 0 | -3.81310000 | -5.37010000 | 4.52440000 |
| Cl | 0 | -4.08520000 | 3.84510000  | 5.83580000 |
| Cl | 0 | -3.85610000 | -4.96540000 | 6.55550000 |
| Al | 0 | -0.07730000 | -1.58080000 | 4.12100000 |
| Al | 0 | 0.02080000  | 6.02380000  | 4.13050000 |
| Cl | 0 | -0.02860000 | -2.37210000 | 6.15510000 |
| Cl | 0 | 0.02040000  | 7.42580000  | 5.69290000 |
| Al | 0 | 3.82470000  | -5.32670000 | 4.51680000 |
| Al | 0 | 4.22320000  | 3.17870000  | 4.22220000 |
| Cl | 0 | 3.86940000  | -4.83200000 | 6.52830000 |
| Cl | 0 | 4.02990000  | 3.46920000  | 6.31830000 |
| H  | 0 | 4.60080000  | 5.60040000  | 4.39410000 |
| H  | 0 | 6.16110000  | -2.23500000 | 3.91210000 |
| Al | 0 | -1.17170000 | 1.40520000  | 4.73560000 |
| O  | 0 | -2.78000000 | 0.96390000  | 5.57550000 |
| O  | 0 | -0.26240000 | 2.57450000  | 5.63390000 |
| O  | 0 | -0.10150000 | 0.15410000  | 4.34560000 |
| C  | 0 | -2.96230000 | 0.13960000  | 6.74590000 |
| C  | 0 | -3.62680000 | -1.16110000 | 6.35710000 |
| C  | 0 | -0.39440000 | 3.92910000  | 5.90640000 |
| C  | 0 | -0.23820000 | 4.21700000  | 7.38900000 |
| H  | 0 | -3.54610000 | 0.71410000  | 7.47210000 |
| H  | 0 | -1.96880000 | -0.04380000 | 7.16940000 |
| H  | 0 | -4.61100000 | -0.98320000 | 5.91420000 |
| H  | 0 | -3.74280000 | -1.79880000 | 7.23720000 |
| H  | 0 | -3.01220000 | -1.69190000 | 5.62380000 |
| H  | 0 | -1.34990000 | 4.33710000  | 5.54430000 |
| H  | 0 | 0.46030000  | 4.44660000  | 5.37840000 |
| H  | 0 | -1.03390000 | 3.69780000  | 7.92980000 |
| H  | 0 | -0.31190000 | 5.28670000  | 7.59370000 |
| H  | 0 | 0.73110000  | 3.85470000  | 7.74140000 |
| C  | 0 | 2.08240000  | 0.55680000  | 5.61510000 |
| C  | 0 | 1.81290000  | 0.38020000  | 6.96170000 |

---

---

|   |   |            |             |            |
|---|---|------------|-------------|------------|
| H | 0 | 1.83910000 | 1.49010000  | 5.11160000 |
| H | 0 | 2.46150000 | -0.27080000 | 5.01180000 |
| H | 0 | 2.12560000 | -0.52490000 | 7.47310000 |
| H | 0 | 0.86830000 | 0.02600000  | 6.30340000 |
| H | 0 | 1.48180000 | 1.23870000  | 7.53830000 |

**Im3<sup>B-OEt</sup>**

| <b>Atom</b> | <b>Fix/Relax</b> | <b>X</b>    | <b>Y</b>    | <b>Z</b>    |
|-------------|------------------|-------------|-------------|-------------|
| Si          | -1               | -3.84010000 | 5.76010000  | -1.97260000 |
| Si          | -1               | -3.84010000 | 1.92000000  | -1.97260000 |
| Si          | -1               | -3.84010000 | -1.92000000 | -1.97260000 |
| Si          | -1               | -3.84010000 | -5.76010000 | -1.97260000 |
| Si          | -1               | 0.00000000  | 5.76010000  | -1.97260000 |
| Si          | -1               | 0.00000000  | 1.92000000  | -1.97260000 |
| Si          | -1               | 0.00000000  | -1.92000000 | -1.97260000 |
| Si          | -1               | 0.00000000  | -5.76010000 | -1.97260000 |
| Si          | -1               | 3.84010000  | 5.76010000  | -1.97260000 |
| Si          | -1               | 3.84010000  | 1.92000000  | -1.97260000 |
| Si          | -1               | 3.84010000  | -1.92000000 | -1.97260000 |
| Si          | -1               | 3.84010000  | -5.76010000 | -1.97260000 |
| Si          | -1               | -3.84010000 | 7.68020000  | -0.61490000 |
| Si          | -1               | -3.84010000 | 3.84010000  | -0.61490000 |
| Si          | -1               | -3.84010000 | 0.00000000  | -0.61490000 |
| Si          | -1               | -3.84010000 | -3.84010000 | -0.61490000 |
| Si          | -1               | -3.84010000 | -7.68020000 | -0.61490000 |
| Si          | -1               | 0.00000000  | 7.68020000  | -0.61490000 |
| Si          | -1               | 0.00000000  | 3.84010000  | -0.61490000 |
| Si          | -1               | 0.00000000  | 0.00000000  | -0.61490000 |
| Si          | -1               | 0.00000000  | -3.84010000 | -0.61490000 |
| Si          | -1               | 0.00000000  | -7.68020000 | -0.61490000 |
| Si          | -1               | 3.84010000  | 7.68020000  | -0.61490000 |
| Si          | -1               | 3.84010000  | 3.84010000  | -0.61490000 |
| Si          | -1               | 3.84010000  | 0.00000000  | -0.61490000 |
| Si          | -1               | 3.84010000  | -3.84010000 | -0.61490000 |
| Si          | -1               | 3.84010000  | -7.68020000 | -0.61490000 |
| Si          | -1               | -5.76010000 | 7.68020000  | 0.74280000  |
| Si          | -1               | -5.76010000 | 3.84010000  | 0.74280000  |
| Si          | -1               | -5.76020000 | 0.00000000  | 0.74280000  |

---



---

|    |    |             |             |             |
|----|----|-------------|-------------|-------------|
| Si | -1 | -5.76020000 | -3.84010000 | 0.74280000  |
| Si | -1 | -5.76010000 | -7.68020000 | 0.74280000  |
| Si | -1 | -1.92000000 | 7.68020000  | 0.74280000  |
| Si | -1 | -1.92000000 | 3.84010000  | 0.74280000  |
| Si | -1 | -1.92000000 | 0.00000000  | 0.74280000  |
| Si | -1 | -1.92000000 | -3.84010000 | 0.74280000  |
| Si | -1 | -1.92000000 | -7.68030000 | 0.74280000  |
| Si | -1 | 1.92000000  | 7.68020000  | 0.74280000  |
| Si | -1 | 1.92000000  | 3.84010000  | 0.74280000  |
| Si | -1 | 1.92000000  | 0.00000000  | 0.74280000  |
| Si | -1 | 1.92000000  | -3.84010000 | 0.74280000  |
| Si | -1 | 1.92000000  | -7.68020000 | 0.74280000  |
| Si | -1 | 5.76010000  | 7.68020000  | 0.74280000  |
| Si | -1 | 5.76010000  | 3.84010000  | 0.74280000  |
| Si | -1 | 5.76010000  | 0.00000000  | 0.74280000  |
| Si | -1 | 5.76010000  | -3.84010000 | 0.74280000  |
| Si | -1 | 5.76010000  | -7.68020000 | 0.74280000  |
| H  | -1 | -2.97390000 | 5.79380000  | -3.16220000 |
| H  | -1 | -5.23870000 | 5.77270000  | -2.51530000 |
| H  | -1 | -2.98160000 | 1.92030000  | -3.17130000 |
| H  | -1 | -5.23930000 | 1.92050000  | -2.51900000 |
| H  | -1 | -2.98150000 | -1.92030000 | -3.17120000 |
| H  | -1 | -5.23930000 | -1.92050000 | -2.51900000 |
| H  | -1 | -2.97400000 | -5.79360000 | -3.16220000 |
| H  | -1 | -5.23870000 | -5.77270000 | -2.51530000 |
| H  | -1 | 1.16760000  | 5.71010000  | -2.86270000 |
| H  | -1 | -1.16750000 | 5.71010000  | -2.86280000 |
| H  | -1 | 1.17310000  | 1.91760000  | -2.85730000 |
| H  | -1 | -1.17330000 | 1.91760000  | -2.85710000 |
| H  | -1 | 1.17330000  | -1.91760000 | -2.85710000 |
| H  | -1 | -1.17310000 | -1.91760000 | -2.85730000 |
| H  | -1 | 1.16750000  | -5.71010000 | -2.86280000 |
| H  | -1 | -1.16760000 | -5.71010000 | -2.86270000 |
| H  | -1 | 5.23870000  | 5.77270000  | -2.51530000 |
| H  | -1 | 2.97400000  | 5.79360000  | -3.16220000 |
| H  | -1 | 5.23930000  | 1.92050000  | -2.51900000 |
| H  | -1 | 2.98150000  | 1.92030000  | -3.17120000 |
| H  | -1 | 5.23930000  | -1.92050000 | -2.51900000 |

---

---

|    |    |             |             |             |
|----|----|-------------|-------------|-------------|
| H  | -1 | 2.98160000  | -1.92030000 | -3.17130000 |
| H  | -1 | 5.23870000  | -5.77270000 | -2.51530000 |
| H  | -1 | 2.97390000  | -5.79380000 | -3.16220000 |
| H  | -1 | -3.82400000 | 8.85870000  | -1.53420000 |
| H  | -1 | -3.82400000 | -8.85870000 | -1.53420000 |
| H  | -1 | 0.00000000  | 8.92610000  | -1.42910000 |
| H  | -1 | 0.00000000  | -8.92610000 | -1.42910000 |
| H  | -1 | 3.82400000  | 8.85870000  | -1.53420000 |
| H  | -1 | 3.82400000  | -8.85870000 | -1.53420000 |
| H  | -1 | -7.00580000 | 7.40190000  | -0.01410000 |
| H  | -1 | -5.87800000 | 8.93300000  | 1.52980000  |
| H  | -1 | -7.05960000 | 3.84790000  | 0.03190000  |
| H  | -1 | -7.05810000 | 0.00000000  | 0.02890000  |
| H  | -1 | -7.05950000 | -3.84760000 | 0.03180000  |
| H  | -1 | -5.87620000 | -8.93250000 | 1.53080000  |
| H  | -1 | -7.00650000 | -7.40340000 | -0.01330000 |
| H  | -1 | -1.90150000 | 8.88670000  | 1.61890000  |
| H  | -1 | -1.90150000 | -8.88670000 | 1.61880000  |
| H  | -1 | 1.90150000  | 8.88670000  | 1.61880000  |
| H  | -1 | 1.90150000  | -8.88670000 | 1.61890000  |
| H  | -1 | 5.87620000  | 8.93250000  | 1.53080000  |
| H  | -1 | 7.00650000  | 7.40340000  | -0.01330000 |
| H  | -1 | 7.05950000  | 3.84760000  | 0.03180000  |
| H  | -1 | 7.05810000  | 0.00000000  | 0.02890000  |
| H  | -1 | 7.05960000  | -3.84790000 | 0.03190000  |
| H  | -1 | 7.00580000  | -7.40190000 | -0.01410000 |
| H  | -1 | 5.87800000  | -8.93300000 | 1.52980000  |
| Si | 0  | -5.00474700 | 5.77685200  | 2.04218200  |
| Si | 0  | -5.04479400 | 1.89705800  | 1.93928400  |
| Si | 0  | -4.97056600 | -1.93788400 | 1.98858400  |
| Si | 0  | -5.04078000 | -5.75326000 | 1.94049900  |
| Si | 0  | -2.43943000 | 5.74461600  | 2.02619100  |
| Si | 0  | -2.62186500 | 1.93824200  | 1.83005500  |
| Si | 0  | -2.46385000 | -1.92112300 | 1.99772000  |
| Si | 0  | -2.60587900 | -5.74406400 | 1.93982500  |
| Si | 0  | 2.36279000  | 5.75571600  | 1.96063400  |
| Si | 0  | 2.70371100  | 2.01740400  | 1.98418400  |
| Si | 0  | 2.38240600  | -1.93698600 | 2.00100800  |

---

---

|    |   |             |             |            |
|----|---|-------------|-------------|------------|
| Si | 0 | 2.60600700  | -5.74292900 | 1.93851000 |
| Si | 0 | 4.82682900  | 5.65902600  | 1.97943800 |
| Si | 0 | 5.12174300  | 1.91683000  | 1.91928800 |
| Si | 0 | 4.92004500  | -1.94362900 | 2.00294800 |
| Si | 0 | 5.04185800  | -5.75412300 | 1.93893000 |
| O  | 0 | -5.61208200 | 5.85352000  | 3.58812900 |
| O  | 0 | -5.17006000 | 1.77559800  | 3.60847100 |
| O  | 0 | -5.33155400 | -2.06288300 | 3.62910200 |
| O  | 0 | -5.25547300 | -5.61135400 | 3.60672400 |
| O  | 0 | -1.49662800 | 5.69525500  | 3.40830800 |
| O  | 0 | -2.30611400 | 2.06305700  | 3.53713300 |
| O  | 0 | -1.66376200 | -1.89131100 | 3.43638400 |
| O  | 0 | -2.39749000 | -5.63486400 | 3.60595200 |
| O  | 0 | 1.58067500  | 5.78904900  | 3.42684200 |
| O  | 0 | 2.66454400  | 2.60802200  | 3.56032500 |
| O  | 0 | 1.46916600  | -2.01519400 | 3.37208500 |
| O  | 0 | 2.40011000  | -5.62479000 | 3.60383000 |
| O  | 0 | 4.86651900  | 4.97502900  | 3.66588700 |
| O  | 0 | 5.42213000  | 2.16465200  | 3.53491100 |
| O  | 0 | 5.22234700  | -2.05214900 | 3.65249000 |
| O  | 0 | 5.25734500  | -5.61537000 | 3.60402100 |
| H  | 0 | -5.25074400 | 5.25553100  | 4.25676300 |
| H  | 0 | -6.22317500 | -2.34811200 | 3.85908500 |
| Al | 0 | -3.80446600 | 2.01876000  | 4.63042100 |
| Al | 0 | -3.82241300 | -5.38446500 | 4.53044500 |
| Cl | 0 | -3.97460900 | 3.75557400  | 5.84273900 |
| Cl | 0 | -3.87491200 | -4.99316500 | 6.56322400 |
| Al | 0 | -0.07017400 | -1.73689900 | 4.15130200 |
| Al | 0 | 0.02403100  | 6.00294900  | 4.13902500 |
| Cl | 0 | -0.19479300 | -2.55983100 | 6.11560900 |
| Cl | 0 | 0.00245300  | 7.34689400  | 5.74872100 |
| Al | 0 | 3.82698700  | -5.34631200 | 4.51945800 |
| Al | 0 | 4.19443600  | 3.18851400  | 4.24208800 |
| Cl | 0 | 3.85610600  | -4.87410000 | 6.53465400 |
| Cl | 0 | 4.05938400  | 3.71706500  | 6.29216400 |
| H  | 0 | 4.68422400  | 5.59730700  | 4.38926800 |
| H  | 0 | 6.13344200  | -2.12252100 | 3.95872900 |
| Al | 0 | -1.15922700 | 1.39775700  | 4.77196900 |

---

---

|   |   |             |             |            |
|---|---|-------------|-------------|------------|
| O | 0 | -2.72543700 | 0.85546300  | 5.56252900 |
| O | 0 | -0.20163200 | 2.53993400  | 5.57925200 |
| O | 0 | 0.00018000  | 0.12111100  | 4.34895700 |
| C | 0 | -2.92446800 | 0.05916900  | 6.75908200 |
| C | 0 | -3.68544700 | -1.19545000 | 6.39950100 |
| C | 0 | -0.15109900 | 3.89067100  | 5.90045200 |
| C | 0 | 0.24356000  | 4.09114800  | 7.35295900 |
| H | 0 | -3.44975700 | 0.68509700  | 7.48687900 |
| H | 0 | -1.93292400 | -0.18117000 | 7.15380000 |
| H | 0 | -4.66620400 | -0.95525300 | 5.97778700 |
| H | 0 | -3.82395200 | -1.81483600 | 7.28916800 |
| H | 0 | -3.12408000 | -1.77122700 | 5.65842700 |
| H | 0 | -1.11465500 | 4.38793200  | 5.69874200 |
| H | 0 | 0.66420600  | 4.33780600  | 5.26985500 |
| H | 0 | -0.52694400 | 3.65647900  | 7.99438000 |
| H | 0 | 0.34363000  | 5.15271100  | 7.58738000 |
| H | 0 | 1.19398700  | 3.58896700  | 7.54428600 |
| C | 0 | 3.04752000  | 0.19391900  | 5.44009700 |
| C | 0 | 2.70235300  | -0.89038000 | 6.13200700 |
| H | 0 | 2.81197500  | 1.19341100  | 5.79795300 |
| H | 0 | 3.60987800  | 0.10958500  | 4.51045400 |
| H | 0 | 2.93858200  | -1.88855600 | 5.77661500 |
| H | 0 | 0.91745600  | 0.37820500  | 4.58680900 |
| H | 0 | 2.16837600  | -0.82224000 | 7.07514600 |

**P2<sup>B-OEt</sup>**

| Atom | Fix/Relax | X           | Y           | Z           |
|------|-----------|-------------|-------------|-------------|
| Si   | -1        | -3.84010000 | 5.76010000  | -1.97260000 |
| Si   | -1        | -3.84010000 | 1.92000000  | -1.97260000 |
| Si   | -1        | -3.84010000 | -1.92000000 | -1.97260000 |
| Si   | -1        | -3.84010000 | -5.76010000 | -1.97260000 |
| Si   | -1        | 0.00000000  | 5.76010000  | -1.97260000 |
| Si   | -1        | 0.00000000  | 1.92000000  | -1.97260000 |
| Si   | -1        | 0.00000000  | -1.92000000 | -1.97260000 |
| Si   | -1        | 0.00000000  | -5.76010000 | -1.97260000 |
| Si   | -1        | 3.84010000  | 5.76010000  | -1.97260000 |
| Si   | -1        | 3.84010000  | 1.92000000  | -1.97260000 |
| Si   | -1        | 3.84010000  | -1.92000000 | -1.97260000 |

---

---

|    |    |             |             |             |
|----|----|-------------|-------------|-------------|
| Si | -1 | 3.84010000  | -5.76010000 | -1.97260000 |
| Si | -1 | -3.84010000 | 7.68020000  | -0.61490000 |
| Si | -1 | -3.84010000 | 3.84010000  | -0.61490000 |
| Si | -1 | -3.84010000 | 0.00000000  | -0.61490000 |
| Si | -1 | -3.84010000 | -3.84010000 | -0.61490000 |
| Si | -1 | -3.84010000 | -7.68020000 | -0.61490000 |
| Si | -1 | 0.00000000  | 7.68020000  | -0.61490000 |
| Si | -1 | 0.00000000  | 3.84010000  | -0.61490000 |
| Si | -1 | 0.00000000  | 0.00000000  | -0.61490000 |
| Si | -1 | 0.00000000  | -3.84010000 | -0.61490000 |
| Si | -1 | 0.00000000  | -7.68020000 | -0.61490000 |
| Si | -1 | 3.84010000  | 7.68020000  | -0.61490000 |
| Si | -1 | 3.84010000  | 3.84010000  | -0.61490000 |
| Si | -1 | 3.84010000  | 0.00000000  | -0.61490000 |
| Si | -1 | 3.84010000  | -3.84010000 | -0.61490000 |
| Si | -1 | 3.84010000  | -7.68020000 | -0.61490000 |
| Si | -1 | -5.76010000 | 7.68020000  | 0.74280000  |
| Si | -1 | -5.76010000 | 3.84010000  | 0.74280000  |
| Si | -1 | -5.76020000 | 0.00000000  | 0.74280000  |
| Si | -1 | -5.76020000 | -3.84010000 | 0.74280000  |
| Si | -1 | -5.76010000 | -7.68020000 | 0.74280000  |
| Si | -1 | -1.92000000 | 7.68020000  | 0.74280000  |
| Si | -1 | -1.92000000 | 3.84010000  | 0.74280000  |
| Si | -1 | -1.92000000 | 0.00000000  | 0.74280000  |
| Si | -1 | -1.92000000 | -3.84010000 | 0.74280000  |
| Si | -1 | -1.92000000 | -7.68030000 | 0.74280000  |
| Si | -1 | 1.91999900  | 7.68020100  | 0.74280000  |
| Si | -1 | 1.91999900  | 3.84009900  | 0.74280000  |
| Si | -1 | 1.92000000  | -0.00000100 | 0.74280100  |
| Si | -1 | 1.92000000  | -3.84010000 | 0.74280000  |
| Si | -1 | 1.92000000  | -7.68020000 | 0.74280000  |
| Si | -1 | 5.76010000  | 7.68019900  | 0.74280000  |
| Si | -1 | 5.76010200  | 3.84010300  | 0.74280000  |
| Si | -1 | 5.76009900  | -0.00000200 | 0.74280100  |
| Si | -1 | 5.76010000  | -3.84010000 | 0.74280000  |
| Si | -1 | 5.76010000  | -7.68020000 | 0.74280000  |
| H  | -1 | -2.97390000 | 5.79380000  | -3.16220000 |
| H  | -1 | -5.23870000 | 5.77270000  | -2.51530000 |

---

---

|   |    |             |             |             |
|---|----|-------------|-------------|-------------|
| H | -1 | -2.98160000 | 1.92030000  | -3.17130000 |
| H | -1 | -5.23930000 | 1.92050000  | -2.51900000 |
| H | -1 | -2.98150000 | -1.92030000 | -3.17120000 |
| H | -1 | -5.23930000 | -1.92050000 | -2.51900000 |
| H | -1 | -2.97400000 | -5.79360000 | -3.16220000 |
| H | -1 | -5.23870000 | -5.77270000 | -2.51530000 |
| H | -1 | 1.16760000  | 5.71010000  | -2.86270000 |
| H | -1 | -1.16750000 | 5.71010000  | -2.86280000 |
| H | -1 | 1.17310000  | 1.91760000  | -2.85730000 |
| H | -1 | -1.17330000 | 1.91760000  | -2.85710000 |
| H | -1 | 1.17330000  | -1.91760000 | -2.85710000 |
| H | -1 | -1.17310000 | -1.91760000 | -2.85730000 |
| H | -1 | 1.16750000  | -5.71010000 | -2.86280000 |
| H | -1 | -1.16760000 | -5.71010000 | -2.86270000 |
| H | -1 | 5.23870000  | 5.77270000  | -2.51530000 |
| H | -1 | 2.97400000  | 5.79360000  | -3.16220000 |
| H | -1 | 5.23930000  | 1.92050000  | -2.51900000 |
| H | -1 | 2.98150000  | 1.92030000  | -3.17120000 |
| H | -1 | 5.23930000  | -1.92050000 | -2.51900000 |
| H | -1 | 2.98160000  | -1.92030000 | -3.17130000 |
| H | -1 | 5.23870000  | -5.77270000 | -2.51530000 |
| H | -1 | 2.97390000  | -5.79380000 | -3.16220000 |
| H | -1 | -3.82400000 | 8.85870000  | -1.53420000 |
| H | -1 | -3.82400000 | -8.85870000 | -1.53420000 |
| H | -1 | 0.00000000  | 8.92610000  | -1.42910000 |
| H | -1 | 0.00000000  | -8.92610000 | -1.42910000 |
| H | -1 | 3.82400000  | 8.85870000  | -1.53420000 |
| H | -1 | 3.82400000  | -8.85870000 | -1.53420000 |
| H | -1 | -7.00580000 | 7.40190000  | -0.01410000 |
| H | -1 | -5.87800000 | 8.93300000  | 1.52980000  |
| H | -1 | -7.05960000 | 3.84790000  | 0.03190000  |
| H | -1 | -7.05810000 | 0.00000000  | 0.02890000  |
| H | -1 | -7.05950000 | -3.84760000 | 0.03180000  |
| H | -1 | -5.87620000 | -8.93250000 | 1.53080000  |
| H | -1 | -7.00650000 | -7.40340000 | -0.01330000 |
| H | -1 | -1.90150000 | 8.88670000  | 1.61890000  |
| H | -1 | -1.90150000 | -8.88670000 | 1.61880000  |
| H | -1 | 1.90150000  | 8.88670000  | 1.61880000  |

---

---

|    |    |             |             |             |
|----|----|-------------|-------------|-------------|
| H  | -1 | 1.90150000  | -8.88670000 | 1.61890000  |
| H  | -1 | 5.87620000  | 8.93250000  | 1.53080000  |
| H  | -1 | 7.00650000  | 7.40340000  | -0.01330000 |
| H  | -1 | 7.05950000  | 3.84760000  | 0.03180000  |
| H  | -1 | 7.05809900  | 0.00000000  | 0.02889900  |
| H  | -1 | 7.05960000  | -3.84790000 | 0.03190000  |
| H  | -1 | 7.00580000  | -7.40190000 | -0.01410000 |
| H  | -1 | 5.87800000  | -8.93300000 | 1.52980000  |
| Si | 0  | -5.00485100 | 5.77696100  | 2.04199500  |
| Si | 0  | -5.05667300 | 1.89871200  | 1.93177200  |
| Si | 0  | -4.95557200 | -1.93798500 | 1.99751300  |
| Si | 0  | -5.04380400 | -5.75392900 | 1.93917000  |
| Si | 0  | -2.43973700 | 5.74453400  | 2.02640400  |
| Si | 0  | -2.63894900 | 1.94621900  | 1.81974500  |
| Si | 0  | -2.42888800 | -1.91545600 | 2.01374900  |
| Si | 0  | -2.60817600 | -5.74384100 | 1.94053500  |
| Si | 0  | 2.35401000  | 5.75500800  | 1.95984300  |
| Si | 0  | 2.68365300  | 1.97808800  | 1.94486000  |
| Si | 0  | 2.42250800  | -1.92537800 | 2.00104100  |
| Si | 0  | 2.60714400  | -5.74561000 | 1.93918900  |
| Si | 0  | 4.80480000  | 5.63527300  | 1.99816100  |
| Si | 0  | 5.10606800  | 1.91638200  | 1.91076600  |
| Si | 0  | 4.94850600  | -1.93961500 | 1.99933200  |
| Si | 0  | 5.04169700  | -5.75569400 | 1.94000500  |
| O  | 0  | -5.61445100 | 5.85703400  | 3.58703600  |
| O  | 0  | -5.19128200 | 1.78842300  | 3.60103000  |
| O  | 0  | -5.32280600 | -2.07012600 | 3.63648700  |
| O  | 0  | -5.26362400 | -5.61169700 | 3.60528100  |
| O  | 0  | -1.49860400 | 5.69873500  | 3.40922200  |
| O  | 0  | -2.35111600 | 2.15666100  | 3.52041900  |
| O  | 0  | -1.57831300 | -1.85642200 | 3.43031400  |
| O  | 0  | -2.40416700 | -5.62596800 | 3.60747300  |
| O  | 0  | 1.57670900  | 5.75576500  | 3.43030400  |
| O  | 0  | 1.54585800  | -1.90943900 | 3.40039500  |
| O  | 0  | 2.39961400  | -5.65732500 | 3.60534300  |
| O  | 0  | 5.29261000  | -2.04707700 | 3.63529500  |
| O  | 0  | 5.25562500  | -5.64437300 | 3.60648000  |
| H  | 0  | -5.26218000 | 5.25707600  | 4.25842000  |

---

---

|    |   |             |             |            |
|----|---|-------------|-------------|------------|
| H  | 0 | -6.22016300 | -2.34060000 | 3.86241800 |
| Al | 0 | -3.82918100 | 2.05362600  | 4.62080500 |
| Al | 0 | -3.83219600 | -5.36610700 | 4.52472200 |
| Cl | 0 | -4.03781700 | 3.74785100  | 5.88531800 |
| Cl | 0 | -3.86628300 | -4.92214800 | 6.54735300 |
| Al | 0 | 0.00389300  | -1.49399900 | 4.09853600 |
| Al | 0 | 0.02196600  | 6.01089800  | 4.14086900 |
| Cl | 0 | -0.06633600 | -1.80519000 | 6.20940200 |
| Cl | 0 | 0.01690700  | 7.42698000  | 5.68922500 |
| Al | 0 | 3.82585100  | -5.45713600 | 4.54297900 |
| Cl | 0 | 3.85065600  | -5.19578300 | 6.59416100 |
| H  | 0 | 6.20940700  | -2.16047500 | 3.90815300 |
| Al | 0 | -1.16817300 | 1.50364200  | 4.72171300 |
| O  | 0 | -2.70673800 | 0.90065200  | 5.52573200 |
| O  | 0 | -0.22679700 | 2.65180800  | 5.53620400 |
| O  | 0 | 0.02112100  | 0.38861100  | 3.98847000 |
| C  | 0 | -2.94989600 | 0.17840200  | 6.76424300 |
| C  | 0 | -3.64077500 | -1.12536200 | 6.43897800 |
| C  | 0 | -0.22840500 | 3.98568700  | 5.91711600 |
| C  | 0 | 0.04162900  | 4.14589000  | 7.40260900 |
| H  | 0 | -3.55048100 | 0.83098700  | 7.40603300 |
| H  | 0 | -1.98117800 | 0.01120700  | 7.23896700 |
| H  | 0 | -4.60030600 | -0.95219700 | 5.94208900 |
| H  | 0 | -3.81505600 | -1.69522400 | 7.35507600 |
| H  | 0 | -3.01164100 | -1.72164400 | 5.77298400 |
| H  | 0 | -1.17791700 | 4.48117200  | 5.65284500 |
| H  | 0 | 0.63604700  | 4.46615500  | 5.38106100 |
| H  | 0 | -0.77036700 | 3.67529100  | 7.96256200 |
| H  | 0 | 0.09580500  | 5.20191700  | 7.67563000 |
| H  | 0 | 0.98289800  | 3.65472000  | 7.65606700 |
| H  | 0 | 0.91155400  | 0.79398700  | 4.05503100 |
| O  | 0 | 2.57353900  | 2.39130100  | 3.57402000 |
| O  | 0 | 4.74691900  | 4.88829000  | 3.67020200 |
| O  | 0 | 5.36755200  | 2.12923600  | 3.53671200 |
| Al | 0 | 4.08208900  | 3.06763200  | 4.25437200 |
| Cl | 0 | 3.88662300  | 3.59301900  | 6.29206300 |
| H  | 0 | 4.52438000  | 5.50135400  | 4.39062800 |

---



**Table S2.** The interfacial interaction energies,  $E_{\text{interface}}$ , between  $\sigma_{\text{C-H}}^*$  and other orbitals of the transition state (TS) and the corresponding intermediate (Im) of alkyl halide (R-Cl) elimination on the surface.

| Donor NBO (i)        | Acceptor NBO (j) | $E_{\text{interface}}$ (kcal/mol) |
|----------------------|------------------|-----------------------------------|
| Im1 <sup>B-OEt</sup> |                  |                                   |
| BD(1)Si102-O118      | BD*(1)C143-H152  | 0.06                              |
| BD(1)Si106-O121      | BD*(1)C143-H152  | 0.05                              |
| LP(1)O114            | BD*(1)C143-H150  | 0.58                              |
| LP(2)O114            | BD*(1)C143-H150  | 0.08                              |
| LP(1)O118            | BD*(1)C143-H152  | 0.36                              |
| LP(2)O118            | BD*(1)C143-H152  | 0.06                              |
| LP(3)O118            | BD*(1)C143-H152  | 0.14                              |
| LP(2)O121            | BD*(1)C143-H152  | 0.06                              |
| LP(3)O121            | BD*(1)C143-H152  | 0.10                              |
| LP*(1)Al128          | BD*(1)C143-H152  | 0.06                              |
| LP(1)C1130           | BD*(1)C143-H151  | 0.06                              |
| LP(3)C1130           | BD*(1)C143-H151  | 0.12                              |
| BD(1)Si104-O120      | BD*(1)C144-H153  | 0.06                              |
| BD(1)Si104-O120      | BD*(1)C144-H154  | 0.11                              |
| LP(1)O116            | BD*(1)C144-H153  | 0.33                              |
| LP(2)O116            | BD*(1)C144-H153  | 0.15                              |
| LP(2)O116            | BD*(1)C144-H154  | 0.13                              |
| LP(2)O120            | BD*(1)C144-H154  | 0.83                              |
| LP(3)O120            | BD*(1)C144-H153  | 0.07                              |
| LP(3)O120            | BD*(1)C144-H154  | 0.07                              |
| BD(1)Si102-O118      | BD*(1)C146-H159  | 0.05                              |
| LP(1)O118            | BD*(1)C146-H159  | 0.05                              |
| LP(3)O118            | BD*(1)C146-H159  | 0.09                              |
| LP(1)O121            | BD*(1)C146-H159  | 0.06                              |
| LP(2)O121            | BD*(1)C146-H159  | 0.77                              |
| LP(3)O121            | BD*(1)C146-H159  | 0.07                              |
| LP(1)O163            | BD*(1)C146-H158  | 1.30                              |
| LP(2)O163            | BD*(1)C146-H158  | 1.53                              |
| LP(3)O163            | BD*(1)C146-H158  | 0.30                              |
| LP*(1)Al127          | BD*(1)C143-H150  | 0.30                              |
| LP*(1)Al127          | BD*(1)C143-H151  | 0.09                              |
| LP*(2)Al127          | BD*(1)C142-H148  | 0.50                              |

|                  |                 |      |
|------------------|-----------------|------|
| LP*(3)A1127      | BD*(1)C142-H148 | 0.26 |
| LP*(3)A1127      | BD*(1)C142-H149 | 0.10 |
| LP*(3)A1127      | BD*(1)C143-H150 | 0.33 |
| LP*(1)A1127      | BD*(1)C144-H153 | 0.11 |
| LP(1)C1129       | BD*(1)C144-H153 | 0.16 |
| LP(2)C1129       | BD*(1)C144-H153 | 0.94 |
| LP(2)C1129       | BD*(1)C144-H154 | 0.09 |
| LP(3)C1129       | BD*(1)C144-H153 | 0.36 |
| LP*(1)A1127      | BD*(1)C147-H161 | 0.05 |
| LP*(1)A1131      | BD*(1)C143-H152 | 0.11 |
| LP*(2)A1131      | BD*(1)C143-H152 | 0.35 |
| LP*(3)A1131      | BD*(1)C143-H152 | 1.08 |
| LP(2)C1133       | BD*(1)C143-H152 | 0.20 |
| BD(1)A1131-C1133 | BD*(1)C146-H158 | 0.06 |
| LP*(1)A1131      | BD*(1)C147-H160 | 0.15 |
| LP*(2)A1131      | BD*(1)C147-H160 | 0.06 |
| LP*(3)A1131      | BD*(1)C146-H158 | 0.41 |
| LP*(3)A1131      | BD*(1)C146-H159 | 2.06 |
| LP*(3)A1131      | BD*(1)C147-H160 | 0.09 |
| LP(1)C1133       | BD*(1)C147-H160 | 0.10 |
| LP(2)C1133       | BD*(1)C147-H160 | 0.05 |
| LP(3)C1133       | BD*(1)C146-H158 | 0.05 |
| LP(3)C1133       | BD*(1)C147-H160 | 1.48 |
| BD(1)A1132-C1134 | BD*(1)C144-H154 | 0.22 |
| CR(1)A1132       | BD*(1)C144-H154 | 0.05 |
| CR(2)A1132       | BD*(1)C144-H154 | 0.37 |
| CR(3)A1132       | BD*(1)C144-H154 | 0.06 |
| LP*(1)A1132      | BD*(1)C144-H153 | 0.09 |
| LP*(1)A1132      | BD*(1)C144-H154 | 1.27 |
| LP*(1)A1132      | BD*(1)C145-H155 | 0.05 |
| LP*(1)A1132      | BD*(1)C145-H156 | 0.07 |
| LP*(2)A1132      | BD*(1)C144-H154 | 5.01 |
| LP*(2)A1132      | BD*(1)C145-H156 | 0.12 |
| LP*(3)A1132      | BD*(1)C144-H153 | 1.77 |
| LP*(3)A1132      | BD*(1)C144-H154 | 0.97 |
| LP(1)C1134       | BD*(1)C145-H156 | 0.08 |
| LP(3)C1134       | BD*(1)C144-H154 | 0.05 |
| LP(3)C1134       | BD*(1)C145-H156 | 0.94 |

|             |                 |      |
|-------------|-----------------|------|
| LP*(1)A1138 | BD*(1)C142-H149 | 0.23 |
| LP*(2)A1138 | BD*(1)C142-H149 | 0.49 |
| LP*(3)A1138 | BD*(1)C142-H148 | 0.16 |
| LP*(3)A1138 | BD*(1)C142-H149 | 0.42 |
| LP*(3)A1138 | BD*(1)C143-H152 | 0.10 |
| LP*(4)A1138 | BD*(1)C142-H149 | 0.21 |
| LP*(4)A1138 | BD*(1)C143-H151 | 0.07 |
| LP*(1)A1138 | BD*(1)C144-H153 | 0.07 |
| LP*(2)A1138 | BD*(1)C145-H155 | 0.17 |
| LP*(3)A1138 | BD*(1)C144-H153 | 0.50 |
| LP*(3)A1138 | BD*(1)C144-H154 | 0.10 |
| LP*(3)A1138 | BD*(1)C145-H155 | 0.06 |
| LP*(4)A1138 | BD*(1)C145-H155 | 0.08 |
| LP*(4)A1138 | BD*(1)C145-H156 | 0.07 |
| LP*(4)A1138 | BD*(1)C145-H157 | 0.10 |
| LP*(1)A1138 | BD*(1)C147-H161 | 0.23 |
| LP*(2)A1138 | BD*(1)C146-H158 | 0.25 |
| LP*(2)A1138 | BD*(1)C147-H161 | 0.34 |
| LP*(2)A1138 | BD*(1)C147-H162 | 0.06 |
| LP*(3)A1138 | BD*(1)C147-H162 | 0.19 |
| LP*(4)A1138 | BD*(1)C146-H158 | 0.87 |
| LP*(4)A1138 | BD*(1)C146-H159 | 0.46 |
| LP*(4)A1138 | BD*(1)C147-H160 | 0.10 |
| LP*(4)A1138 | BD*(1)C147-H161 | 1.69 |
| LP*(4)A1138 | BD*(1)C147-H162 | 0.33 |
| LP(1)O139   | BD*(1)C142-H148 | 3.49 |
| LP(1)O139   | BD*(1)C143-H151 | 0.71 |
| LP(2)O139   | BD*(1)C142-H148 | 1.67 |
| LP(2)O139   | BD*(1)C142-H149 | 4.72 |
| LP(1)O140   | BD*(1)C144-H153 | 8.22 |
| LP(1)O140   | BD*(1)C144-H154 | 1.17 |
| LP(2)O140   | BD*(1)C144-H154 | 7.41 |
| LP(2)O140   | BD*(1)C145-H156 | 0.59 |
| LP(3)O140   | BD*(1)C144-H153 | 0.69 |
| LP(3)O140   | BD*(1)C144-H154 | 0.64 |
| LP(1)O140   | BD*(1)C146-H158 | 0.21 |
| LP(1)O140   | BD*(1)C146-H159 | 0.57 |
| LP(1)O140   | BD*(1)C147-H161 | 0.29 |

|                      |                 |      |
|----------------------|-----------------|------|
| LP(2)O140            | BD*(1)C146-H158 | 0.15 |
| LP(2)O140            | BD*(1)C147-H161 | 0.41 |
| LP(1)O141            | BD*(1)C146-H158 | 2.05 |
| LP(1)O141            | BD*(1)C147-H162 | 0.62 |
| LP(2)O141            | BD*(1)C146-H158 | 1.97 |
| LP(2)O141            | BD*(1)C146-H159 | 4.03 |
| LP*(1)Al166          | BD*(1)C145-H157 | 0.09 |
| LP*(2)Al166          | BD*(1)C144-H154 | 0.12 |
| LP*(3)Al166          | BD*(1)C144-H154 | 0.19 |
| LP(1)Cl167           | BD*(1)C145-H157 | 0.09 |
| LP(2)Cl167           | BD*(1)C145-H157 | 0.38 |
| LP(3)Cl167           | BD*(1)C145-H157 | 0.06 |
| LP*(3)Al166          | BD*(1)C146-H158 | 0.81 |
| Total                |                 | 77.1 |
| <hr/>                |                 |      |
| TS1 <sup>B-OEt</sup> |                 |      |
| BD(1)Si102-O118      | BD*(1)C148-H155 | 0.06 |
| LP(1)O114            | BD*(1)C148-H153 | 0.61 |
| LP(2)O114            | BD*(1)C148-H153 | 0.05 |
| LP(1)O118            | BD*(1)C148-H155 | 0.07 |
| LP(2)O118            | BD*(1)C148-H155 | 0.32 |
| LP(3)O118            | BD*(1)C148-H155 | 0.18 |
| BD(1)Si104-O120      | BD*(1)C149-H157 | 0.14 |
| LP(1)O116            | BD*(1)C149-H156 | 0.08 |
| LP(2)O116            | BD*(1)C149-H157 | 0.09 |
| LP(2)O120            | BD*(1)C149-H157 | 0.61 |
| LP(3)O120            | BD*(1)C149-H156 | 0.07 |
| LP*(1)Al138          | BD*(1)C149-H156 | 0.05 |
| LP*(1)Al138          | BD*(1)C149-H157 | 0.21 |
| LP*(1)Al138          | BD*(1)C150-H160 | 0.10 |
| LP(1)Cl140           | BD*(1)C150-H160 | 0.15 |
| LP(2)Cl140           | BD*(1)C150-H160 | 0.61 |
| LP(3)Cl140           | BD*(1)C150-H160 | 0.10 |
| BD*(1)O121-Al138     | BD*(1)C149-H157 | 0.05 |
| BD(1)Si101-O117      | BD*(1)C163-H168 | 0.07 |
| BD(1)Si102-O118      | BD*(1)C162-H164 | 0.07 |
| LP(2)O117            | BD*(1)C163-H168 | 0.06 |
| LP(3)O118            | BD*(1)C162-H164 | 0.09 |
| LP(2)O122            | BD*(1)C162-H164 | 0.38 |

|                  |                 |      |
|------------------|-----------------|------|
| LP*(2)A1138      | BD*(1)C162-H164 | 0.16 |
| LP*(2)A1138      | BD*(1)C163-H166 | 0.09 |
| LP(1)C1139       | BD*(1)C162-H165 | 0.10 |
| LP(2)C1139       | BD*(1)C162-H165 | 0.08 |
| LP(3)C1139       | BD*(1)C162-H165 | 0.48 |
| LP(2)C1140       | BD*(1)C163-H166 | 0.15 |
| LP(3)C1140       | BD*(1)C163-H166 | 0.10 |
| LP*(1)A1130      | BD*(1)C148-H153 | 0.22 |
| LP*(1)A1130      | BD*(1)C148-H154 | 0.06 |
| LP*(2)A1130      | BD*(1)C147-H151 | 0.68 |
| LP*(3)A1130      | BD*(1)C147-H151 | 0.31 |
| LP*(3)A1130      | BD*(1)C147-H152 | 0.16 |
| LP*(3)A1130      | BD*(1)C148-H153 | 0.31 |
| LP(3)C1132       | BD*(1)C147-H151 | 0.05 |
| LP*(1)A1130      | BD*(1)C149-H156 | 0.12 |
| LP(1)C1132       | BD*(1)C149-H156 | 0.07 |
| LP(2)C1132       | BD*(1)C149-H156 | 0.71 |
| LP(3)C1132       | BD*(1)C149-H156 | 0.17 |
| LP*(1)A1134      | BD*(1)C148-H155 | 0.08 |
| LP*(2)A1134      | BD*(1)C148-H155 | 0.34 |
| LP*(3)A1134      | BD*(1)C148-H155 | 0.12 |
| LP*(4)A1134      | BD*(1)C148-H155 | 1.23 |
| LP*(1)A1134      | BD*(1)C162-H164 | 0.47 |
| LP*(2)A1134      | BD*(1)C162-H164 | 0.39 |
| LP*(2)A1134      | BD*(1)C162-H165 | 0.18 |
| LP*(4)A1134      | BD*(1)C162-H164 | 2.50 |
| LP*(4)A1134      | BD*(1)C162-H165 | 0.29 |
| BD(1)A1135-C1136 | BD*(1)C149-H157 | 0.25 |
| CR(1)A1135       | BD*(1)C149-H157 | 0.07 |
| CR(2)A1135       | BD*(1)C149-H157 | 0.54 |
| CR(3)A1135       | BD*(1)C149-H157 | 0.10 |
| LP*(1)A1135      | BD*(1)C149-H156 | 0.11 |
| LP*(1)A1135      | BD*(1)C149-H157 | 3.20 |
| LP*(1)A1135      | BD*(1)C150-H159 | 0.07 |
| LP*(2)A1135      | BD*(1)C149-H157 | 4.65 |
| LP*(2)A1135      | BD*(1)C150-H159 | 0.14 |
| LP*(3)A1135      | BD*(1)C149-H156 | 1.17 |
| LP*(3)A1135      | BD*(1)C149-H157 | 1.22 |

|                  |                 |       |
|------------------|-----------------|-------|
| LP(1)C1136       | BD*(1)C150-H159 | 0.11  |
| LP(3)C1136       | BD*(1)C149-H157 | 0.10  |
| LP(3)C1136       | BD*(1)C150-H159 | 1.11  |
| LP*(1)A1143      | BD*(1)C147-H152 | 0.11  |
| LP*(2)A1143      | BD*(1)C147-H152 | 0.28  |
| LP*(3)A1143      | BD*(1)C147-H151 | 0.08  |
| LP*(3)A1143      | BD*(1)C147-H152 | 1.00  |
| LP(1)O146        | BD*(1)C148-H155 | 0.05  |
| LP(2)O146        | BD*(1)C147-H152 | 0.07  |
| LP*(1)A1143      | BD*(1)C149-H156 | 0.43  |
| LP*(2)A1143      | BD*(1)C149-H157 | 0.19  |
| LP*(3)A1143      | BD*(1)C149-H157 | 0.05  |
| LP*(3)A1143      | BD*(1)C150-H158 | 0.11  |
| BD*(1)A1143-O146 | BD*(1)C149-H156 | 0.14  |
| LP*(1)A1143      | BD*(1)C162-H164 | 0.08  |
| LP*(2)A1143      | BD*(1)C163-H168 | 0.15  |
| LP*(3)A1143      | BD*(1)C162-H165 | 0.07  |
| LP*(3)A1143      | BD*(1)C163-H166 | 0.09  |
| LP*(3)A1143      | BD*(1)C163-H167 | 0.06  |
| LP*(3)A1143      | BD*(1)C163-H168 | 2.36  |
| LP(2)O146        | BD*(1)C162-H164 | 0.10  |
| LP(2)O146        | BD*(1)C162-H165 | 0.06  |
| LP(1)O144        | BD*(1)C147-H151 | 2.92  |
| LP(1)O144        | BD*(1)C147-H152 | 0.61  |
| LP(1)O144        | BD*(1)C148-H154 | 0.84  |
| LP(2)O144        | BD*(1)C147-H151 | 2.64  |
| LP(2)O144        | BD*(1)C147-H152 | 4.89  |
| LP(1)O145        | BD*(1)C149-H156 | 7.91  |
| LP(2)O145        | BD*(1)C149-H156 | 1.15  |
| LP(2)O145        | BD*(1)C149-H157 | 10.47 |
| LP(1)O145        | BD*(1)C163-H168 | 1.98  |
| LP(2)O145        | BD*(1)C163-H168 | 0.31  |
| LP(3)O145        | BD*(1)C163-H168 | 0.06  |
| LP(2)C1161       | BD*(1)C147-H151 | 0.05  |
| LP(2)C1161       | BD*(1)C147-H152 | 0.31  |
| LP(2)C1161       | BD*(1)C148-H155 | 0.05  |
| LP(1)C1161       | BD*(1)C162-H164 | 1.09  |
| LP(2)C1161       | BD*(1)C162-H165 | 1.44  |

|                       |                 |      |
|-----------------------|-----------------|------|
| LP(2)C1161            | BD*(1)C163-H166 | 0.70 |
| LP(3)C1161            | BD*(1)C162-H164 | 1.45 |
| Total                 |                 | 71.0 |
| <hr/>                 |                 |      |
| Im1 <sup>B-OiPr</sup> |                 |      |
| LP(1)O114             | BD*(1)C143-H150 | 0.06 |
| LP(1)O118             | BD*(1)C143-H150 | 0.50 |
| LP(3)O118             | BD*(1)C143-H150 | 0.08 |
| LP*(1)A1128           | BD*(1)C143-H150 | 0.15 |
| LP(1)C1130            | BD*(1)C143-H151 | 0.09 |
| LP(3)C1130            | BD*(1)C143-H151 | 0.17 |
| LP(1)O116             | BD*(1)C144-H153 | 0.26 |
| LP(2)O116             | BD*(1)C144-H153 | 0.33 |
| LP(2)O116             | BD*(1)C154-H171 | 0.06 |
| LP(1)O120             | BD*(1)C154-H169 | 0.26 |
| LP(1)O120             | BD*(1)C154-H171 | 0.08 |
| LP(2)O120             | BD*(1)C154-H169 | 0.20 |
| LP(1)O172             | BD*(1)C154-H169 | 0.45 |
| LP(2)O172             | BD*(1)C154-H169 | 0.08 |
| BD(1)Si24-Si39        | BD*(1)C159-H166 | 0.08 |
| BD(1)Si102-O118       | BD*(1)C159-H167 | 0.07 |
| BD(1)Si106-Si110      | BD*(1)C159-H166 | 0.06 |
| LP(3)O118             | BD*(1)C159-H167 | 0.11 |
| LP(1)O121             | BD*(1)C159-H166 | 0.05 |
| LP(1)O121             | BD*(1)C159-H168 | 0.33 |
| LP(2)O121             | BD*(1)C159-H168 | 0.29 |
| LP(3)O121             | BD*(1)C159-H167 | 0.07 |
| LP(1)O172             | BD*(1)C146-H158 | 0.22 |
| LP(2)O172             | BD*(1)C146-H158 | 0.09 |
| LP(2)O172             | BD*(1)C159-H166 | 0.12 |
| LP(2)O172             | BD*(1)C159-H167 | 0.09 |
| LP(2)O172             | BD*(1)C159-H168 | 0.07 |
| LP(3)O172             | BD*(1)C146-H158 | 0.07 |
| LP(3)O172             | BD*(1)C159-H166 | 0.09 |
| BD(1)A1127-C1129      | BD*(1)C149-H164 | 0.06 |
| LP*(1)A1127           | BD*(1)C142-H148 | 0.35 |
| LP*(1)A1127           | BD*(1)C149-H164 | 0.17 |
| LP*(2)A1127           | BD*(1)C149-H163 | 0.16 |
| LP*(2)A1127           | BD*(1)C149-H164 | 0.23 |

|                  |                 |      |
|------------------|-----------------|------|
| LP*(3)A1127      | BD*(1)C142-H148 | 0.54 |
| LP*(3)A1127      | BD*(1)C149-H164 | 0.34 |
| LP(3)C1129       | BD*(1)C142-H148 | 0.08 |
| LP(3)C1129       | BD*(1)C149-H164 | 0.73 |
| BD(1)A1127-C1129 | BD*(1)C144-H153 | 0.07 |
| LP*(1)A1127      | BD*(1)C144-H153 | 0.29 |
| LP*(1)A1127      | BD*(1)C145-H155 | 0.09 |
| LP*(3)A1127      | BD*(1)C144-H153 | 0.13 |
| LP(1)C1129       | BD*(1)C144-H153 | 0.10 |
| LP(1)C1129       | BD*(1)C145-H155 | 0.17 |
| LP(2)C1129       | BD*(1)C144-H153 | 0.81 |
| LP(2)C1129       | BD*(1)C145-H155 | 0.35 |
| LP(2)C1129       | BD*(1)C145-H157 | 0.11 |
| LP(3)C1129       | BD*(1)C144-H153 | 0.58 |
| LP(3)C1129       | BD*(1)C145-H155 | 0.14 |
| LP*(1)A1127      | BD*(1)C146-H158 | 0.16 |
| LP*(1)A1127      | BD*(1)C147-H161 | 0.10 |
| LP*(1)A1131      | BD*(1)C143-H152 | 0.14 |
| LP*(2)A1131      | BD*(1)C143-H152 | 0.15 |
| LP*(3)A1131      | BD*(1)C143-H150 | 0.95 |
| LP*(3)A1131      | BD*(1)C143-H151 | 0.14 |
| LP(2)C1133       | BD*(1)C143-H152 | 0.17 |
| LP(3)C1133       | BD*(1)C143-H152 | 0.16 |
| LP*(1)A1131      | BD*(1)C147-H160 | 0.21 |
| LP*(1)A1131      | BD*(1)C159-H167 | 0.17 |
| LP*(2)A1131      | BD*(1)C146-H158 | 0.06 |
| LP*(2)A1131      | BD*(1)C147-H160 | 0.16 |
| LP*(2)A1131      | BD*(1)C147-H162 | 0.05 |
| LP*(2)A1131      | BD*(1)C159-H167 | 0.06 |
| LP*(2)A1131      | BD*(1)C159-H168 | 0.10 |
| LP*(3)A1131      | BD*(1)C146-H158 | 0.08 |
| LP*(3)A1131      | BD*(1)C147-H160 | 0.09 |
| LP*(3)A1131      | BD*(1)C159-H166 | 0.07 |
| LP*(3)A1131      | BD*(1)C159-H167 | 1.68 |
| LP*(3)A1131      | BD*(1)C159-H168 | 0.73 |
| LP(1)C1133       | BD*(1)C147-H160 | 0.06 |
| LP(3)C1133       | BD*(1)C147-H160 | 1.34 |
| LP(3)C1133       | BD*(1)C159-H167 | 0.06 |



|                  |                 |      |
|------------------|-----------------|------|
| BD(1)A1132-C1134 | BD*(1)C154-H170 | 0.11 |
| BD(1)A1132-C1134 | BD*(1)C154-H171 | 2.18 |
| CR(2)A1132       | BD*(1)C154-H170 | 0.25 |
| CR(2)A1132       | BD*(1)C154-H171 | 0.20 |
| CR(3)A1132       | BD*(1)C154-H170 | 0.06 |
| CR(5)A1132       | BD*(1)C154-H171 | 0.09 |
| LP*(1)A1132      | BD*(1)C144-H153 | 0.11 |
| LP*(1)A1132      | BD*(1)C145-H156 | 0.07 |
| LP*(1)A1132      | BD*(1)C154-H169 | 1.35 |
| LP*(1)A1132      | BD*(1)C154-H170 | 0.71 |
| LP*(1)A1132      | BD*(1)C154-H171 | 0.77 |
| LP*(2)A1132      | BD*(1)C144-H153 | 0.91 |
| LP*(2)A1132      | BD*(1)C145-H156 | 0.16 |
| LP*(2)A1132      | BD*(1)C154-H170 | 0.97 |
| LP*(2)A1132      | BD*(1)C154-H171 | 0.09 |
| LP*(3)A1132      | BD*(1)C144-H153 | 0.09 |
| LP*(3)A1132      | BD*(1)C154-H169 | 0.11 |
| LP*(3)A1132      | BD*(1)C154-H170 | 1.05 |
| LP*(3)A1132      | BD*(1)C154-H171 | 2.48 |
| LP(1)C1134       | BD*(1)C154-H169 | 0.16 |
| LP(1)C1134       | BD*(1)C154-H171 | 0.07 |
| LP(3)C1134       | BD*(1)C154-H171 | 1.45 |
| LP*(1)A1138      | BD*(1)C143-H151 | 0.07 |
| LP*(1)A1138      | BD*(1)C143-H152 | 0.11 |
| LP*(1)A1138      | BD*(1)C149-H165 | 0.16 |
| LP*(2)A1138      | BD*(1)C142-H148 | 0.10 |
| LP*(2)A1138      | BD*(1)C143-H151 | 0.14 |
| LP*(2)A1138      | BD*(1)C143-H152 | 0.32 |
| LP*(2)A1138      | BD*(1)C149-H163 | 0.19 |
| LP*(2)A1138      | BD*(1)C149-H165 | 0.71 |
| LP*(3)A1138      | BD*(1)C143-H151 | 0.32 |
| LP*(3)A1138      | BD*(1)C143-H152 | 0.58 |
| LP*(3)A1138      | BD*(1)C149-H163 | 0.05 |
| LP*(4)A1138      | BD*(1)C143-H152 | 0.66 |
| LP*(4)A1138      | BD*(1)C149-H165 | 0.59 |
| LP*(1)A1138      | BD*(1)C144-H153 | 0.08 |
| LP*(2)A1138      | BD*(1)C145-H155 | 0.06 |
| LP*(2)A1138      | BD*(1)C154-H169 | 0.29 |

|             |                 |      |
|-------------|-----------------|------|
| LP*(3)A1138 | BD*(1)C144-H153 | 0.87 |
| LP*(3)A1138 | BD*(1)C145-H155 | 0.13 |
| LP*(3)A1138 | BD*(1)C145-H156 | 0.05 |
| LP*(3)A1138 | BD*(1)C154-H169 | 0.40 |
| LP*(3)A1138 | BD*(1)C154-H171 | 0.07 |
| LP*(4)A1138 | BD*(1)C144-H153 | 0.12 |
| LP*(4)A1138 | BD*(1)C145-H156 | 0.06 |
| LP*(4)A1138 | BD*(1)C145-H157 | 0.09 |
| LP*(4)A1138 | BD*(1)C154-H169 | 0.10 |
| LP*(4)A1138 | BD*(1)C154-H170 | 0.14 |
| LP*(4)A1138 | BD*(1)C154-H171 | 0.18 |
| LP*(1)A1138 | BD*(1)C146-H158 | 0.12 |
| LP*(1)A1138 | BD*(1)C147-H161 | 0.27 |
| LP*(2)A1138 | BD*(1)C146-H158 | 0.38 |
| LP*(2)A1138 | BD*(1)C147-H161 | 0.43 |
| LP*(3)A1138 | BD*(1)C147-H162 | 0.13 |
| LP*(3)A1138 | BD*(1)C159-H167 | 0.05 |
| LP*(4)A1138 | BD*(1)C146-H158 | 1.67 |
| LP*(4)A1138 | BD*(1)C147-H160 | 0.16 |
| LP*(4)A1138 | BD*(1)C147-H161 | 1.94 |
| LP*(4)A1138 | BD*(1)C147-H162 | 0.36 |
| LP(1)O139   | BD*(1)C142-H148 | 1.70 |
| LP(1)O139   | BD*(1)C149-H163 | 0.72 |
| LP(2)O139   | BD*(1)C142-H148 | 3.09 |
| LP(1)O140   | BD*(1)C143-H152 | 0.05 |
| LP(2)O140   | BD*(1)C149-H165 | 0.14 |
| LP(3)O140   | BD*(1)C149-H165 | 0.08 |
| LP(1)O140   | BD*(1)C144-H153 | 7.68 |
| LP(2)O140   | BD*(1)C145-H156 | 0.63 |
| LP(2)O140   | BD*(1)C154-H171 | 1.08 |
| LP(3)O140   | BD*(1)C144-H153 | 0.77 |
| LP(1)O140   | BD*(1)C146-H158 | 0.17 |
| LP(1)O140   | BD*(1)C147-H160 | 0.10 |
| LP(1)O140   | BD*(1)C147-H161 | 0.52 |
| LP(2)O140   | BD*(1)C146-H158 | 0.49 |
| LP(2)O140   | BD*(1)C147-H161 | 0.14 |
| LP(1)O141   | BD*(1)C143-H152 | 0.06 |
| LP(3)O141   | BD*(1)C143-H152 | 0.06 |

|                       |                 |      |
|-----------------------|-----------------|------|
| LP(1)O141             | BD*(1)C146-H158 | 1.17 |
| LP(1)O141             | BD*(1)C147-H162 | 0.74 |
| LP(2)O141             | BD*(1)C146-H158 | 2.74 |
| LP*(1)A1175           | BD*(1)C154-H170 | 0.27 |
| LP*(3)A1175           | BD*(1)C154-H169 | 0.10 |
| LP*(3)A1175           | BD*(1)C154-H170 | 0.11 |
| LP(1)C1176            | BD*(1)C154-H170 | 0.08 |
| LP(2)C1176            | BD*(1)C154-H170 | 1.00 |
| LP(3)C1176            | BD*(1)C154-H170 | 0.41 |
| LP*(1)A1175           | BD*(1)C159-H168 | 0.15 |
| LP*(2)A1175           | BD*(1)C159-H166 | 0.09 |
| LP*(2)A1175           | BD*(1)C159-H167 | 0.12 |
| LP*(2)A1175           | BD*(1)C159-H168 | 0.43 |
| LP*(3)A1175           | BD*(1)C146-H158 | 0.42 |
| LP*(3)A1175           | BD*(1)C159-H167 | 0.11 |
| LP*(3)A1175           | BD*(1)C159-H168 | 0.08 |
| Total                 |                 | 68.1 |
| <hr/>                 |                 |      |
| TS1 <sup>B-OiPr</sup> |                 |      |
| LP(1)O116             | BD*(1)C137-H139 | 0.12 |
| LP(2)O116             | BD*(1)C137-H139 | 0.09 |
| LP(2)O116             | BD*(1)C140-H146 | 0.06 |
| LP(1)O120             | BD*(1)C140-H144 | 0.34 |
| LP(1)O120             | BD*(1)C140-H145 | 0.06 |
| LP(1)O120             | BD*(1)C140-H146 | 0.12 |
| LP(2)O120             | BD*(1)C140-H144 | 0.25 |
| LP(1)O147             | BD*(1)C140-H144 | 0.28 |
| LP(2)O147             | BD*(1)C140-H144 | 0.05 |
| BD(1)Si101-O117       | BD*(1)C155-H157 | 0.05 |
| LP(1)O114             | BD*(1)C156-H159 | 4.07 |
| LP(3)O117             | BD*(1)C155-H157 | 0.06 |
| LP(3)O118             | BD*(1)C156-H161 | 0.06 |
| LP(3)C1130            | BD*(1)C156-H160 | 0.10 |
| BD(1)Si102-O118       | BD*(1)C171-H175 | 0.07 |
| BD(1)Si106-O121       | BD*(1)C171-H175 | 0.14 |
| BD(1)Si109-O149       | BD*(1)C171-H177 | 0.06 |
| LP(2)O118             | BD*(1)C171-H175 | 0.06 |
| LP(3)O118             | BD*(1)C171-H175 | 0.07 |
| LP(1)O121             | BD*(1)C171-H175 | 0.44 |

|                  |                 |      |
|------------------|-----------------|------|
| LP(2)O121        | BD*(1)C171-H175 | 4.65 |
| LP(3)O121        | BD*(1)C171-H175 | 0.80 |
| LP(1)O147        | BD*(1)C168-H170 | 0.87 |
| LP(2)O147        | BD*(1)C168-H170 | 0.62 |
| LP(2)O147        | BD*(1)C171-H177 | 0.05 |
| LP(3)O147        | BD*(1)C168-H170 | 0.28 |
| LP(3)O147        | BD*(1)C171-H177 | 0.08 |
| LP(2)O148        | BD*(1)C171-H177 | 0.07 |
| LP(2)O149        | BD*(1)C171-H177 | 0.48 |
| BD(1)A1127-C1129 | BD*(1)C137-H139 | 0.07 |
| LP*(1)A1127      | BD*(1)C137-H139 | 0.28 |
| LP*(1)A1127      | BD*(1)C138-H141 | 0.07 |
| LP*(3)A1127      | BD*(1)C137-H139 | 0.16 |
| LP(1)C1129       | BD*(1)C137-H139 | 0.05 |
| LP(1)C1129       | BD*(1)C138-H141 | 0.06 |
| LP(2)C1129       | BD*(1)C137-H139 | 0.80 |
| LP(2)C1129       | BD*(1)C138-H141 | 0.30 |
| LP(2)C1129       | BD*(1)C138-H143 | 0.08 |
| LP(3)C1129       | BD*(1)C137-H139 | 0.53 |
| LP(3)C1129       | BD*(1)C138-H141 | 0.06 |
| LP*(1)A1127      | BD*(1)C156-H159 | 0.11 |
| LP*(2)A1127      | BD*(1)C155-H157 | 0.35 |
| LP*(2)A1127      | BD*(1)C158-H163 | 0.17 |
| LP*(3)A1127      | BD*(1)C155-H157 | 1.10 |
| LP*(3)A1127      | BD*(1)C156-H159 | 0.09 |
| BD(1)A1127-C1129 | BD*(1)C168-H170 | 0.06 |
| LP*(1)A1127      | BD*(1)C168-H170 | 0.16 |
| LP*(1)A1127      | BD*(1)C169-H173 | 0.07 |
| LP*(2)A1127      | BD*(1)C168-H170 | 0.11 |
| BD(1)A1131-C1132 | BD*(1)C140-H145 | 0.08 |
| BD(1)A1131-C1132 | BD*(1)C140-H146 | 2.08 |
| CR(2)A1131       | BD*(1)C140-H145 | 0.23 |
| CR(2)A1131       | BD*(1)C140-H146 | 0.17 |
| CR(3)A1131       | BD*(1)C140-H145 | 0.06 |
| CR(5)A1131       | BD*(1)C140-H146 | 0.08 |
| LP*(1)A1131      | BD*(1)C137-H139 | 0.10 |
| LP*(1)A1131      | BD*(1)C140-H144 | 1.74 |
| LP*(1)A1131      | BD*(1)C140-H145 | 0.63 |

|                  |                 |      |
|------------------|-----------------|------|
| LP*(1)A1131      | BD*(1)C140-H146 | 0.88 |
| LP*(2)A1131      | BD*(1)C137-H139 | 0.83 |
| LP*(2)A1131      | BD*(1)C138-H142 | 0.08 |
| LP*(2)A1131      | BD*(1)C140-H145 | 0.84 |
| LP*(2)A1131      | BD*(1)C140-H146 | 0.08 |
| LP*(3)A1131      | BD*(1)C137-H139 | 0.17 |
| LP*(3)A1131      | BD*(1)C140-H144 | 0.12 |
| LP*(3)A1131      | BD*(1)C140-H145 | 1.06 |
| LP*(3)A1131      | BD*(1)C140-H146 | 2.28 |
| LP(1)C1132       | BD*(1)C140-H144 | 0.19 |
| LP(1)C1132       | BD*(1)C140-H146 | 0.07 |
| LP(3)C1132       | BD*(1)C140-H146 | 1.43 |
| LP(1)O136        | BD*(1)C137-H139 | 7.26 |
| LP(2)O136        | BD*(1)C138-H142 | 0.57 |
| LP(2)O136        | BD*(1)C140-H146 | 1.35 |
| LP(3)O136        | BD*(1)C137-H139 | 1.15 |
| LP(2)O136        | BD*(1)C158-H162 | 0.19 |
| LP(2)O136        | BD*(1)C158-H163 | 0.10 |
| LP(1)O136        | BD*(1)C168-H170 | 0.07 |
| LP(1)O136        | BD*(1)C169-H172 | 0.18 |
| LP(1)O136        | BD*(1)C169-H173 | 1.99 |
| LP(2)O136        | BD*(1)C168-H170 | 0.24 |
| LP(2)O136        | BD*(1)C169-H173 | 0.19 |
| BD(1)A1150-C1151 | BD*(1)C140-H145 | 0.06 |
| LP*(1)A1150      | BD*(1)C140-H145 | 0.31 |
| LP*(2)A1150      | BD*(1)C140-H145 | 0.09 |
| LP*(3)A1150      | BD*(1)C140-H144 | 0.07 |
| LP*(3)A1150      | BD*(1)C140-H145 | 0.23 |
| LP(2)C1151       | BD*(1)C140-H145 | 1.40 |
| LP(3)C1151       | BD*(1)C140-H145 | 0.23 |
| LP*(1)A1150      | BD*(1)C169-H174 | 0.27 |
| LP*(2)A1150      | BD*(1)C171-H175 | 0.29 |
| LP*(2)A1150      | BD*(1)C171-H177 | 1.91 |
| LP*(3)A1150      | BD*(1)C168-H170 | 0.11 |
| LP*(3)A1150      | BD*(1)C171-H177 | 0.25 |
| LP(1)C1151       | BD*(1)C169-H174 | 0.38 |
| LP(2)C1151       | BD*(1)C169-H174 | 1.43 |
| LP(3)C1151       | BD*(1)C169-H174 | 0.63 |

|                  |                 |      |
|------------------|-----------------|------|
| LP(3)C1151       | BD*(1)C171-H177 | 0.10 |
| LP*(1)A1153      | BD*(1)C137-H139 | 1.36 |
| LP*(1)A1153      | BD*(1)C138-H141 | 0.10 |
| LP*(1)A1153      | BD*(1)C140-H144 | 0.19 |
| LP*(2)A1153      | BD*(1)C140-H144 | 1.04 |
| LP*(2)A1153      | BD*(1)C140-H145 | 0.06 |
| LP*(2)A1153      | BD*(1)C140-H146 | 0.18 |
| LP*(3)A1153      | BD*(1)C138-H142 | 0.07 |
| LP*(3)A1153      | BD*(1)C138-H143 | 0.07 |
| LP*(3)A1153      | BD*(1)C140-H145 | 0.09 |
| LP*(3)A1153      | BD*(1)C140-H146 | 0.15 |
| LP(1)O166        | BD*(1)C140-H144 | 0.06 |
| BD*(1)A1153-O166 | BD*(1)C137-H139 | 0.27 |
| LP*(1)A1153      | BD*(1)C158-H162 | 0.19 |
| LP*(1)A1153      | BD*(1)C158-H163 | 0.27 |
| LP*(2)A1153      | BD*(1)C156-H160 | 0.10 |
| LP*(2)A1153      | BD*(1)C156-H161 | 0.08 |
| LP*(2)A1153      | BD*(1)C158-H162 | 0.22 |
| LP*(2)A1153      | BD*(1)C158-H163 | 0.09 |
| LP*(2)A1153      | BD*(1)C158-H164 | 0.30 |
| LP*(3)A1153      | BD*(1)C158-H162 | 0.48 |
| LP*(3)A1153      | BD*(1)C158-H163 | 0.14 |
| LP*(3)A1153      | BD*(1)C158-H164 | 0.91 |
| LP(2)O166        | BD*(1)C158-H164 | 0.08 |
| BD*(1)A1153-O166 | BD*(1)C158-H163 | 0.10 |
| BD*(1)A1153-O166 | BD*(1)C158-H164 | 0.16 |
| BD(1)A1153-O166  | BD*(1)C168-H170 | 0.05 |
| LP*(1)A1153      | BD*(1)C168-H170 | 0.21 |
| LP*(2)A1153      | BD*(1)C168-H170 | 1.39 |
| LP*(3)A1153      | BD*(1)C168-H170 | 1.01 |
| LP*(3)A1153      | BD*(1)C169-H172 | 0.11 |
| LP*(3)A1153      | BD*(1)C169-H173 | 2.09 |
| LP*(3)A1153      | BD*(1)C169-H174 | 0.16 |
| LP(1)O166        | BD*(1)C168-H170 | 1.70 |
| LP(2)O166        | BD*(1)C168-H170 | 0.77 |
| BD*(1)A1153-O166 | BD*(1)C168-H170 | 0.42 |
| LP(1)O154        | BD*(1)C156-H160 | 0.71 |
| LP(2)O154        | BD*(1)C155-H157 | 4.32 |

|                  |                 |      |
|------------------|-----------------|------|
| LP(3)O154        | BD*(1)C155-H157 | 0.58 |
| LP(3)O154        | BD*(1)C168-H170 | 0.06 |
| LP*(2)A1165      | BD*(1)C137-H139 | 0.08 |
| BD(1)A1165-C1167 | BD*(1)C156-H161 | 0.16 |
| LP*(1)A1165      | BD*(1)C156-H161 | 0.20 |
| LP*(1)A1165      | BD*(1)C158-H164 | 0.11 |
| LP*(2)A1165      | BD*(1)C156-H161 | 0.15 |
| LP*(3)A1165      | BD*(1)C156-H160 | 0.06 |
| LP*(3)A1165      | BD*(1)C156-H161 | 1.00 |
| LP(1)C1167       | BD*(1)C158-H164 | 0.18 |
| LP(2)C1167       | BD*(1)C156-H161 | 1.59 |
| LP(2)C1167       | BD*(1)C158-H164 | 1.23 |
| LP(3)C1167       | BD*(1)C156-H161 | 0.18 |
| LP(3)C1167       | BD*(1)C158-H164 | 0.64 |
| BD(1)A1165-C1167 | BD*(1)C171-H175 | 0.09 |
| LP*(1)A1165      | BD*(1)C171-H175 | 0.08 |
| LP*(2)A1165      | BD*(1)C168-H170 | 0.08 |
| LP*(2)A1165      | BD*(1)C171-H175 | 0.36 |
| LP*(3)A1165      | BD*(1)C171-H175 | 2.22 |
| LP*(3)A1165      | BD*(1)C171-H176 | 0.12 |
| LP(1)C1167       | BD*(1)C169-H174 | 0.07 |
| LP(2)C1167       | BD*(1)C171-H175 | 0.23 |
| LP(2)C1167       | BD*(1)C171-H177 | 0.08 |
| LP(3)C1167       | BD*(1)C168-H170 | 0.07 |
| LP(3)C1167       | BD*(1)C169-H174 | 0.65 |
| LP(3)C1167       | BD*(1)C171-H175 | 0.06 |
| Total            |                 | 83.4 |

---
